# Supplementary material for: A simple and high-yield route to iridium, rhodium, osmium and rutheniumnido-6-metalladecaborane compounds
Source: Royal Society of Chemistry journal article supplement (doi:10.1039/d1dt02971a), 2021-01-01
Supplement: d1dt02971a1.pdf [file d1dt02971a1.pdf]

# Supporting Information

## **A simple and high-yield route to iridium, rhodium, osmium and ruthenium *nido*-metalladecaborane compounds.**

Jonathan Bould,<sup>\*a,b</sup> Michael G.S. Londesborough,<sup>a</sup> Vincenzo Passarelli,<sup>b</sup>  
William Clegg,<sup>c</sup> Paul G. Waddell,<sup>c</sup> Josef Cvačka,<sup>d</sup> and Ramón Macías,<sup>\* b</sup>

<sup>a</sup>*Institute of Inorganic Chemistry, Academy of Sciences of the Czech Republic, Husinec-Řež 250 68, Czech Republic; [orcid.org/0000-0003-3615-1938](https://orcid.org/0000-0003-3615-1938); Email: [jbould@gmail.com](mailto:jbould@gmail.com)*

<sup>b</sup>*Departamento de Química Inorgánica, Instituto de Síntesis Química y Catálisis Homogénea (ISQCH), Universidad de Zaragoza-CSIC, C/Pedro Cerbuna 12, ES-50009 Zaragoza, Spain; [orcid.org/0000-0003-2299-9428](https://orcid.org/0000-0003-2299-9428); E-mail: [rmacias@unizar.es](mailto:rmacias@unizar.es)*

<sup>c</sup>*School of Natural and Environmental Sciences, Newcastle University, Newcastle upon Tyne, NE1 7RU, UK; [orcid.org/0000-0003-1643-5298](https://orcid.org/0000-0003-1643-5298).*

<sup>d</sup>*Institute of Organic Chemistry and Biochemistry of the Czech Academy of Sciences, Flemingovo nám. 2, CZ-166 10 Prague 6, Czech Republic. [orcid.org/](https://orcid.org/)*

# TABLE OF CONTENTS

## Figures

|                                                                                                                                                                                                                                                                                                                                                                                                                                                                                                                                    | Page |
|------------------------------------------------------------------------------------------------------------------------------------------------------------------------------------------------------------------------------------------------------------------------------------------------------------------------------------------------------------------------------------------------------------------------------------------------------------------------------------------------------------------------------------|------|
| <b>Figure S1.</b> (upper two spectra) $^1\text{H}\{-^{11}\text{B}\}$ spectra for [6,6,6-(PPh <sub>3</sub> ) <sub>2</sub> H- <i>nido</i> -6-IrB <sub>9</sub> H <sub>13</sub> ] <b>1</b> and [6,6,6-(PPh <sub>3</sub> ) <sub>2</sub> H- <i>nido</i> -6-RhB <sub>9</sub> H <sub>13</sub> ] <b>2</b> in the high-field region. (centre) $^1\text{H}\{-^{11}\text{B}\}$ NMR spectrum for <b>2</b> in CD <sub>2</sub> Cl <sub>2</sub> solution at 213 K, 400 MHz. (lower) 128 MHz $^{11}\text{B}\{-^1\text{H}\}$ spectrum for <b>2</b> . | 6    |
| <b>Figure S2.</b> Subtracted $^1\text{H}\{-^{11}\text{B}\}$ spectrum of [6,6,6-(PPh <sub>3</sub> ) <sub>2</sub> H- <i>nido</i> -6-RhB <sub>9</sub> H <sub>13</sub> ] <b>2</b>                                                                                                                                                                                                                                                                                                                                                      | 6    |
| <b>Figure S3.</b> $^1\text{H}\{-^{11}\text{B}_{\text{selective}}\}$ spectra for [6,6,6-(PPh <sub>3</sub> ) <sub>2</sub> H- <i>nido</i> -6-RhB <sub>9</sub> H <sub>13</sub> ] <b>2</b>                                                                                                                                                                                                                                                                                                                                              | 7    |
| <b>Figure S4.</b> $^{31}\text{P}\{-^1\text{H}\}$ NMR spectrum for [6,6,6-(PPh <sub>3</sub> ) <sub>2</sub> H- <i>nido</i> -6-RhB <sub>9</sub> H <sub>13</sub> ] <b>2</b>                                                                                                                                                                                                                                                                                                                                                            | 7    |
| <b>Figure S5</b> $^1\text{H}\{-^{11}\text{B}_{\text{selective}}\}$ spectra for [6,6,6-(PPh <sub>3</sub> ) <sub>2</sub> H- <i>nido</i> -6-IrB <sub>9</sub> H <sub>13</sub> ] <b>1</b>                                                                                                                                                                                                                                                                                                                                               | 8    |
| <b>Figure S6.</b> (left) $^{11}\text{B}\{-^1\text{H}\}$ and $^{31}\text{P}\{-^1\text{H}\}$ NMR spectra for [6,6,6-(PPh <sub>3</sub> ) <sub>2</sub> (CO)- <i>nido</i> -6-RuB <sub>9</sub> H <sub>13</sub> ] <b>3</b>                                                                                                                                                                                                                                                                                                                | 8    |
| <b>Figure S7.</b> Infrared spectrum (ATR) for [6,6,6-(PPh <sub>3</sub> ) <sub>2</sub> H- <i>nido</i> -6-RhB <sub>9</sub> H <sub>13</sub> ] <b>2</b>                                                                                                                                                                                                                                                                                                                                                                                | 9    |
| <b>Figure S8.</b> $^1\text{H}\{-^{11}\text{B}\}$ NMR spectrum for [6,6,6-(PPh <sub>3</sub> ) <sub>2</sub> (CO)- <i>nido</i> -6-RuB <sub>9</sub> H <sub>13</sub> ] <b>3</b>                                                                                                                                                                                                                                                                                                                                                         | 9    |
| <b>Figure S9.</b> IR spectrum of [6,6,6-(PPh <sub>3</sub> ) <sub>2</sub> (CO)- <i>nido</i> -6-RuB <sub>9</sub> H <sub>13</sub> ] <b>3</b>                                                                                                                                                                                                                                                                                                                                                                                          | 10   |
| <b>Figure S10.</b> $^{11}\text{B}\{-^1\text{H}\}$ NMR spectrum for [6,6,6-(PPh <sub>3</sub> ) <sub>2</sub> (CO)- <i>nido</i> -6-OsB <sub>9</sub> H <sub>13</sub> ] <b>4</b>                                                                                                                                                                                                                                                                                                                                                        | 11   |
| <b>Figure S11.</b> $^1\text{H}\{-^{11}\text{B}_{\text{selective}}\}$ spectra for [6,6,6-(PPh <sub>3</sub> ) <sub>2</sub> (CO)- <i>nido</i> -6-OsB <sub>9</sub> H <sub>13</sub> ] <b>3</b>                                                                                                                                                                                                                                                                                                                                          | 11   |
| <b>Figure S10.</b> $^{11}\text{B}\{-^1\text{H}\}$ NMR spectrum for [6,6,6-(PPh <sub>3</sub> ) <sub>2</sub> (CO)- <i>nido</i> -6-OsB <sub>9</sub> H <sub>13</sub> ] <b>4</b>                                                                                                                                                                                                                                                                                                                                                        | 11   |
| <b>Figure S11.</b> $^1\text{H}\{-^{11}\text{B}_{\text{selective}}\}$ spectra for [6,6,6-(PPh <sub>3</sub> ) <sub>2</sub> (CO)- <i>nido</i> -6-OsB <sub>9</sub> H <sub>13</sub> ] <b>3</b> ,                                                                                                                                                                                                                                                                                                                                        | 11   |
| <b>Figure S12.</b> Subtracted $^1\text{H}\{-^{11}\text{B}\}$ spectrum of [6,6,6-(PPh <sub>3</sub> ) <sub>2</sub> (CO)- <i>nido</i> -6-OsB <sub>9</sub> H <sub>13</sub> ] <b>4</b>                                                                                                                                                                                                                                                                                                                                                  | 12   |
| <b>Figure S13.</b> $^{31}\text{P}\{-^1\text{H}\}$ NMR spectrum for [6,6,6-(PPh <sub>3</sub> ) <sub>2</sub> (CO)- <i>nido</i> -6-OsB <sub>9</sub> H <sub>13</sub> ] <b>4</b>                                                                                                                                                                                                                                                                                                                                                        | 12   |
| <b>Figure S14.</b> IR spectrum of [6,6,6-(PPh <sub>3</sub> ) <sub>2</sub> (CO)- <i>nido</i> -6-OsB <sub>9</sub> H <sub>13</sub> ] <b>4</b>                                                                                                                                                                                                                                                                                                                                                                                         | 13   |
| <b>Figure S15.</b> IR spectrum of [1,1,1-(CO)H(PPh <sub>3</sub> )- <i>isocloso</i> -1-RuB <sub>9</sub> H <sub>8</sub> -μ-(1,2)-{Pt(PMe <sub>2</sub> Ph) <sub>2</sub> }] <b>5</b>                                                                                                                                                                                                                                                                                                                                                   | 13   |
| <b>Figure S16.</b> $\{^{11}\text{B}\}\{-^1\text{H}\}$ NMR spectrum for [1,1,1-(CO)H(PPh <sub>3</sub> )- <i>isocloso</i> -1-RuB <sub>9</sub> H <sub>8</sub> -μ-(1,2)-{Pt(PMe <sub>2</sub> Ph) <sub>2</sub> }] <b>5</b>                                                                                                                                                                                                                                                                                                              | 14   |
| <b>Figure S17.</b> $^{31}\text{P}\{-^1\text{H}\}$ NMR spectrum for [1,1,1-(CO)H(PPh <sub>3</sub> )- <i>isocloso</i> -1-RuB <sub>9</sub> H <sub>8</sub> -μ-(1,2)-{Pt(PMe <sub>2</sub> Ph) <sub>2</sub> }] <b>5</b>                                                                                                                                                                                                                                                                                                                  | 14   |
| <b>Figure S18.</b> $^1\text{H}\{-^{11}\text{B}_{\text{selective}}\}$ spectra for [1,1,1-(CO)H(PPh <sub>3</sub> )- <i>isocloso</i> -1-RuB <sub>9</sub> H <sub>8</sub> -μ-(1,2)-{Pt(PMe <sub>2</sub> Ph) <sub>2</sub> }] <b>5</b>                                                                                                                                                                                                                                                                                                    | 15   |

|                                                                                                                                                                                                                                                                                                                                 |    |
|---------------------------------------------------------------------------------------------------------------------------------------------------------------------------------------------------------------------------------------------------------------------------------------------------------------------------------|----|
| <b>Figure S19.</b> $^{11}\text{B}$ - $\{^1\text{H}\}$ NMR spectrum for $[7,7-(\text{PMe}_2\text{Ph})_2-9,9,9-(\text{CO})(\text{PPh}_3)_2\text{-nido-}7,9\text{-PtOsB}_9\text{H}_{11}].\text{CH}_2\text{Cl}_2$ <b>6</b>                                                                                                          | 16 |
| <b>Figure S20.</b> Variation of energy and the $\text{PH}_3\text{-Rh6}$ distances in the relaxed potential energy surface (PES) scan upon the rotation of the $\{\text{Rh}(\text{H})(\text{PH}_3)_2\}$ ligand sphere in $[6,6,6-(\text{H})(\text{PMe}_3)_2\text{-nido-RhB}_9\text{H}_{13}]$                                     | 17 |
| <b>Figure S21.</b> Variation of energy and the $\text{PMe}_3\text{-Ir6}$ distances in the relaxed PES scan upon the rotation of the $\{\text{Ir}(\text{H})(\text{PMe}_3)_2\}$ ligand sphere in $[6,6,6-(\text{H})(\text{PMe}_3)_2\text{-nido-IrB}_9\text{H}_{13}]$                                                              | 18 |
| <b>Figure S22.</b> Variation of energy and the $\text{PH}_3\text{-Ru6}$ distances in the relaxed PES scan upon the rotation of the $\{\text{Ir}(\text{H})(\text{PMe}_3)_2\}$ ligand sphere, in the $\text{PH}_3$ -ligated hydridoruthenadecaborane model, $[6,6,6-(\text{CO})(\text{PH}_3)_2\text{-nido-RuB}_9\text{H}_{13}]$ , | 19 |

## Tables

|                                                                                                                                                                                                                                   | Page |
|-----------------------------------------------------------------------------------------------------------------------------------------------------------------------------------------------------------------------------------|------|
| <b>Table S1.</b> Bond lengths and angles for $[6,6,6-(\text{CO})(\text{PPh}_3)_2\text{-nido-}6\text{-RuB}_9\text{H}_{13}]$ <b>3</b>                                                                                               | 21   |
| <b>Table S2.</b> Bond lengths [ $\text{\AA}$ ] and angles for $[1,1,1-(\text{CO})\text{H}(\text{PPh}_3)\text{-isocloso-}1\text{-RuB}_9\text{H}_8\text{-}\mu\text{-}(1,2)\text{-}\{\text{Pt}(\text{PMe}_2\text{Ph})_2\}]$ <b>5</b> | 23   |
| <b>Table S3.</b> Bond lengths [ $\text{\AA}$ ] and angles [ $^\circ$ ] for $[7,7-(\text{PMe}_2\text{Ph})_2-9,9,9-(\text{CO})(\text{PPh}_3)_2\text{-nido-}7,9\text{-PtOsB}_9\text{H}_{11}].\text{CH}_2\text{Cl}_2$ <b>6</b> .      | 27   |
| <b>Table S4.</b> Bond lengths and angles for $[5,5,5-(\text{PPh}_3)_2(\text{CO})\text{-nido-}5\text{-OsB}_9\text{H}_{13}]$ <b>7</b>                                                                                               | 32   |
| <b>Table S5.</b> Cartesian coordinates for DFT-calculated asymmetric isomer of $[6,6,6\text{-H}(\text{PPh}_3)_2\text{-nido-}6\text{-IrB}_9\text{H}_{13}]$ <b>1</b>                                                                | 37   |
| <b>Table S6.</b> Cartesian coordinates for DFT-calculated symmetric isomer of $[6,6,6\text{-H}(\text{PPh}_3)_2\text{-nido-}6\text{-IrB}_9\text{H}_{13}]$ <b>1</b>                                                                 | 39   |
| <b>Table S7.</b> Cartesian coordinates for DFT-calculated asymmetric isomer of $[6,6,6\text{-H}(\text{PPh}_3)_2\text{-nido-}6\text{-RhB}_9\text{H}_{13}]$ <b>2</b>                                                                | 40   |
| <b>Table S8.</b> Cartesian coordinates for DFT-calculated symmetric isomer of $[6,6,6\text{-H}(\text{PPh}_3)_2\text{-nido-}6\text{-RhB}_9\text{H}_{13}]$ <b>2</b>                                                                 | 42   |
| <b>Table S9.</b> Cartesian coordinates for DFT-calculated asymmetric isomer of $[6,6,6\text{-CO}(\text{PPh}_3)_2\text{-nido-}6\text{-RuB}_9\text{H}_{13}]$ <b>3</b>                                                               | 44   |
| <b>Table S10.</b> Cartesian coordinates for DFT-calculated symmetric isomer of $[6,6,6\text{-CO}(\text{PPh}_3)_2\text{-nido-}6\text{-RuB}_9\text{H}_{13}]$ <b>3</b>                                                               | 46   |
| <b>Table S11.</b> Cartesian coordinates for DFT-calculated asymmetric isomer of $[6,6,6\text{-CO}(\text{PPh}_3)_2\text{-nido-}6\text{-OsB}_9\text{H}_{13}]$ <b>4</b>                                                              | 47   |

|                                                                                                                                                                                                                 |    |
|-----------------------------------------------------------------------------------------------------------------------------------------------------------------------------------------------------------------|----|
| <b>Table S12.</b> Cartesian coordinates for DFT-calculated [1,1,1-(CO)H(PPh <sub>3</sub> )- <i>isocloso</i> -1-RuB <sub>9</sub> H <sub>8</sub> -μ-(1,2)-{Pt(PMe <sub>2</sub> Ph) <sub>2</sub> }] <b>5</b>       | 49 |
| <b>Table S13.</b> Cartesian coordinates for DFT-calculated [7,7-(PMe <sub>2</sub> Ph) <sub>2</sub> -9,9,9-(CO)(PPh <sub>3</sub> ) <sub>2</sub> - <i>nido</i> -7,9-PtOsB <sub>9</sub> H <sub>11</sub> ] <b>6</b> | 51 |
| <b>Table S14.</b> Cartesian coordinates for DFT-calculated low-energy asymmetric conformer for [6,6,6-H(PH <sub>3</sub> ) <sub>2</sub> - <i>nido</i> -6-RhB <sub>9</sub> H <sub>13</sub> ] model                | 54 |
| <b>Table S15.</b> Cartesian coordinates for DFT-calculated high-energy asymmetric conformer for [6,6,6-H(PH <sub>3</sub> ) <sub>2</sub> - <i>nido</i> -6-RhB <sub>9</sub> H <sub>13</sub> ] model               | 54 |
| <b>Table S16.</b> Cartesian coordinates for DFT-calculated intermediate-energy asymmetric conformer for [6,6,6-H(PH <sub>3</sub> ) <sub>2</sub> - <i>nido</i> -6-RhB <sub>9</sub> H <sub>13</sub> ] model       | 55 |
| <b>Table S17.</b> Cartesian coordinates for DFT-calculated low-energy asymmetric conformer for [6,6,6-H(PMe <sub>3</sub> ) <sub>2</sub> - <i>nido</i> -6-IrB <sub>9</sub> H <sub>13</sub> ] model               | 56 |
| <b>Table S18</b> Cartesian coordinates for DFT-calculated high-energy asymmetric conformer                                                                                                                      | 57 |
| <b>Table S19</b> Cartesian coordinates for DFT-calculated intermediate-energy symmetric conformer                                                                                                               | 58 |
| <b>Table S20</b> Cartesian coordinates for DFT-calculated low-energy asymmetric conformer                                                                                                                       | 59 |
| <b>Table S21</b> Cartesian coordinates for DFT-calculated high-energy asymmetric conformer                                                                                                                      | 60 |
| <b>Table S22</b> Cartesian coordinates for DFT-calculated intermediate-energy asymmetric conformer                                                                                                              | 60 |

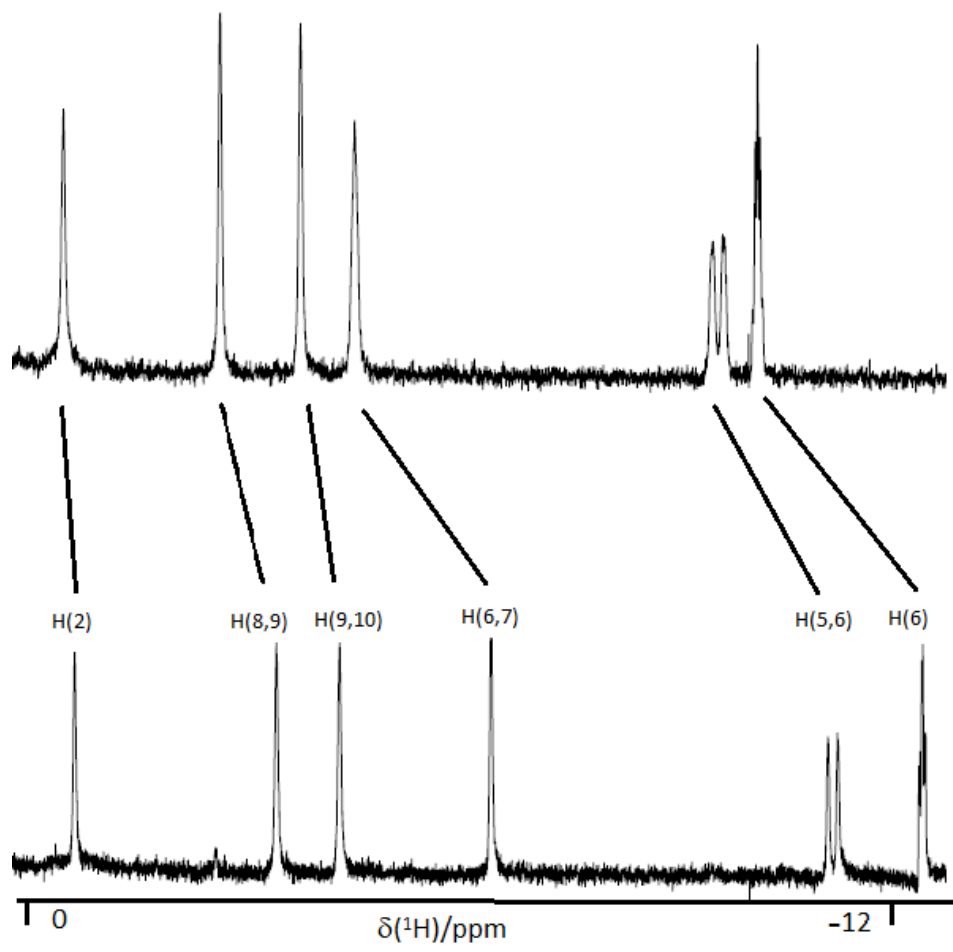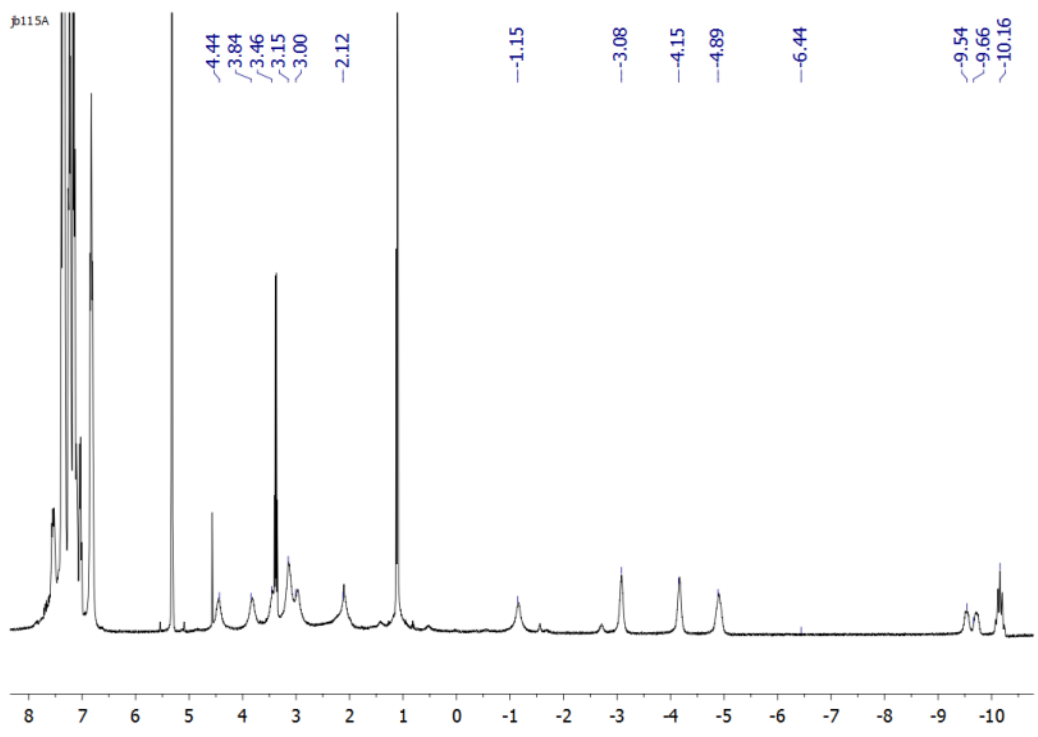

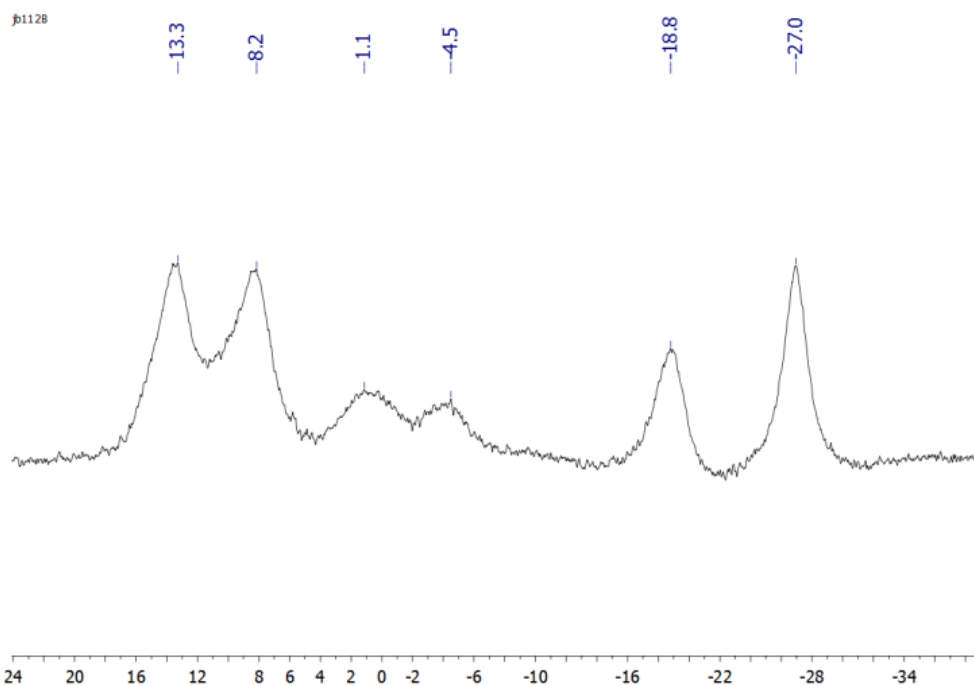

**Figure S1.** (upper two spectra)  $^1\text{H}\{-^{11}\text{B}\}$  spectra for  $[6,6,6\text{-}(\text{PPh}_3)_2\text{H-nido-6-IrB}_9\text{H}_{13}]$  **1** and  $[6,6,6\text{-}(\text{PPh}_3)_2\text{H-nido-6-RhB}_9\text{H}_{13}]$  **2** in the high-field region. (centre)  $^1\text{H}\{-^{11}\text{B}\}$  NMR spectrum for **2** in  $\text{CD}_2\text{Cl}_2$  solution at 213 K, 400 MHz. (lower) 128 MHz  $^{11}\text{B}\{-^1\text{H}\}$  spectrum for **2**. The boron peaks are very broad due to the low temperature. The boron peaks are very broad due to the low temperature.

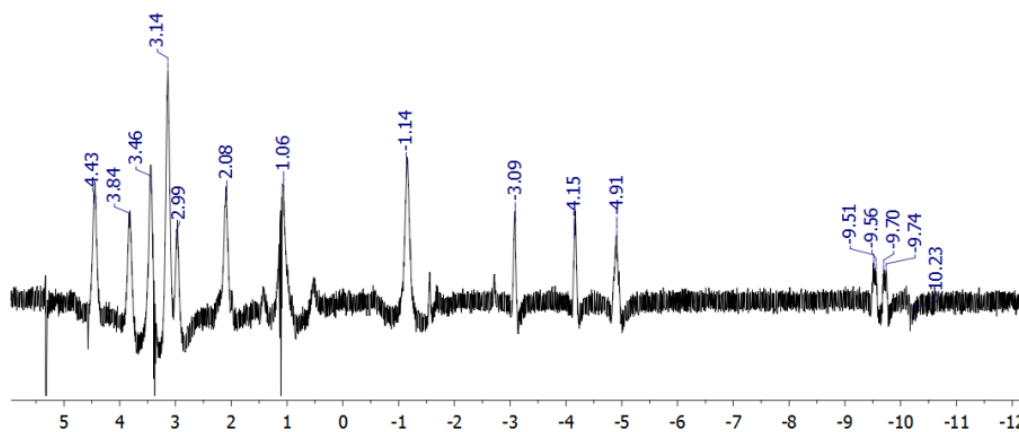

**Figure S2.** Subtracted  $^1\text{H}\{-^{11}\text{B}\}$  spectrum of  $[6,6,6\text{-}(\text{PPh}_3)_2\text{H-nido-6-RhB}_9\text{H}_{13}]$  **2** obtained by subtracting the “off-resonance”  $^1\text{H}\{-^{11}\text{B}\}$  spectrum (i.e. with the boron decoupler set at +150 ppm) from the “on-resonance” (i.e. zero ppm)  $^1\text{H}\{-^{11}\text{B}\}$  spectrum in order to remove non-boron-coupled resonances such as solvent resonances. In  $\text{CD}_2\text{Cl}_2$  at 213K, 400 MHz.

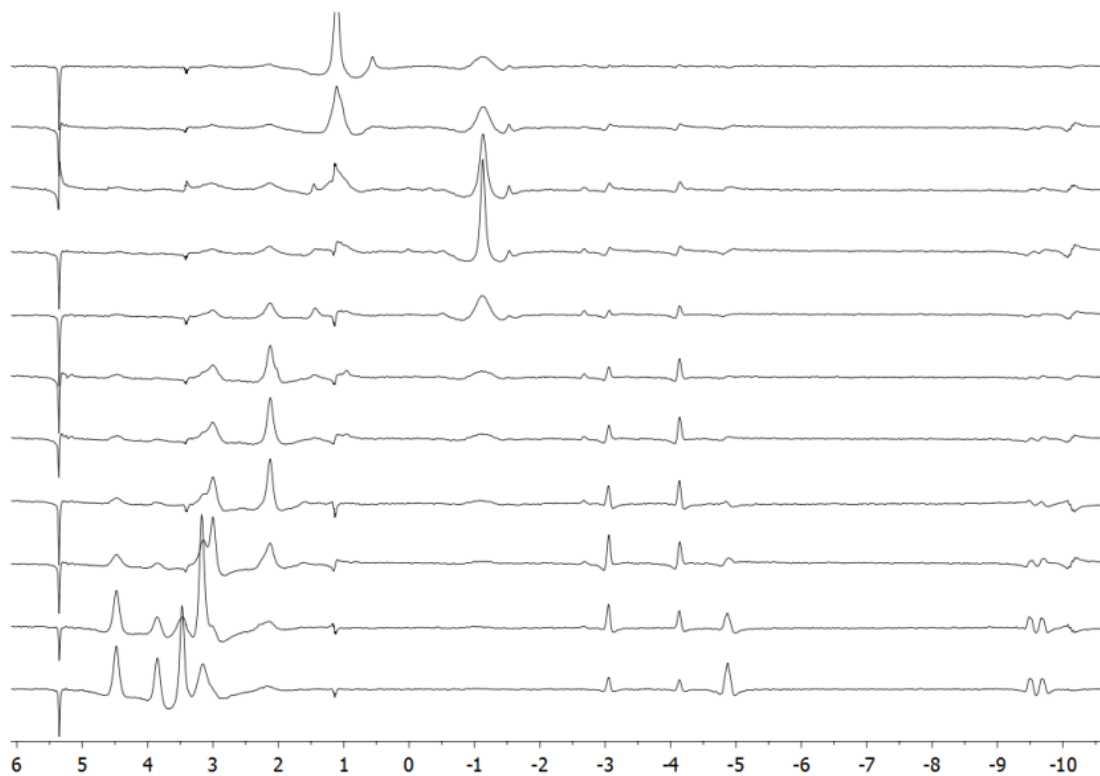

**Figure S3.**  $^1\text{H}\{-^{11}\text{B}_{\text{selective}}\}$  spectra for  $[\text{6,6,6-(PPh}_3)_2\text{H-nido-6-RhB}_9\text{H}_{13}]$  **2**,  $\text{CD}_2\text{Cl}_2$ , 213 K. 400 MHz

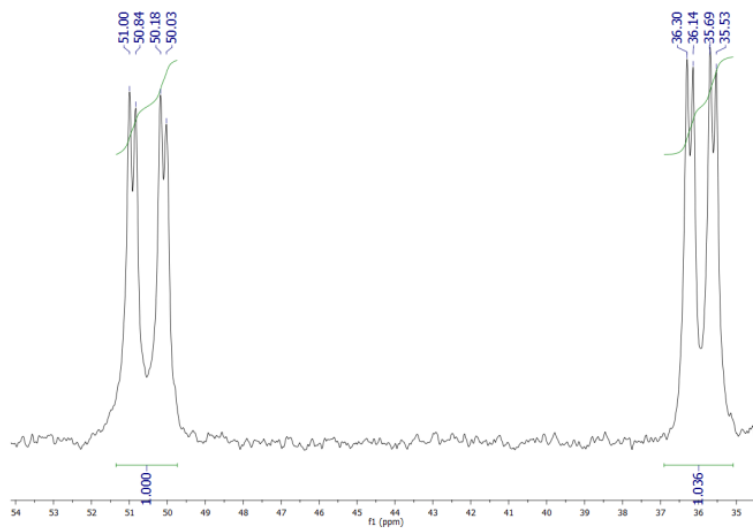

**Figure S4.**  $^{31}\text{P}\{-^1\text{H}\}$  NMR spectrum for  $[\text{6,6,6-(PPh}_3)_2\text{H-nido-6-RhB}_9\text{H}_{13}]$  **2** in  $\text{CD}_2\text{Cl}_2$  at 162 MHz, 213 K.

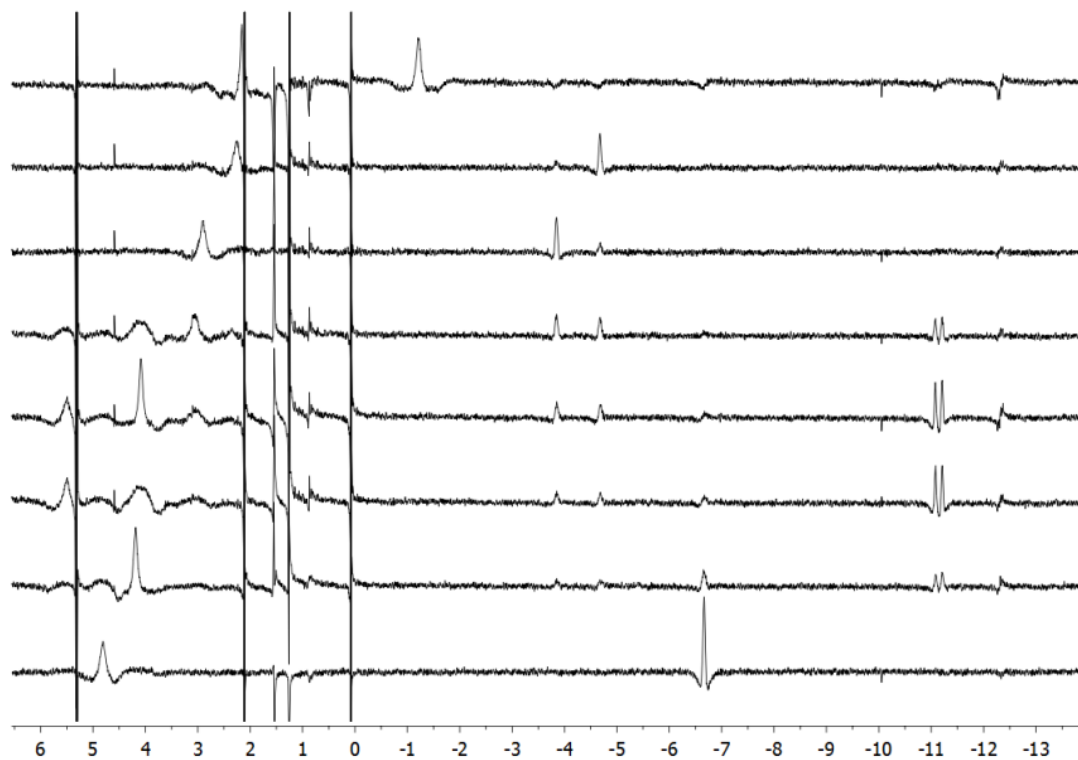

**Figure S5**  $^1\text{H}\{-^{11}\text{B}_{\text{selective}}\}$  spectra for  $[6,6,6\text{-}(\text{PPh}_3)_2\text{H-nido-6-IrB}_9\text{H}_{13}]$  **1**, 500 MHz,  $\text{CD}_2\text{Cl}_2$ , 301K.

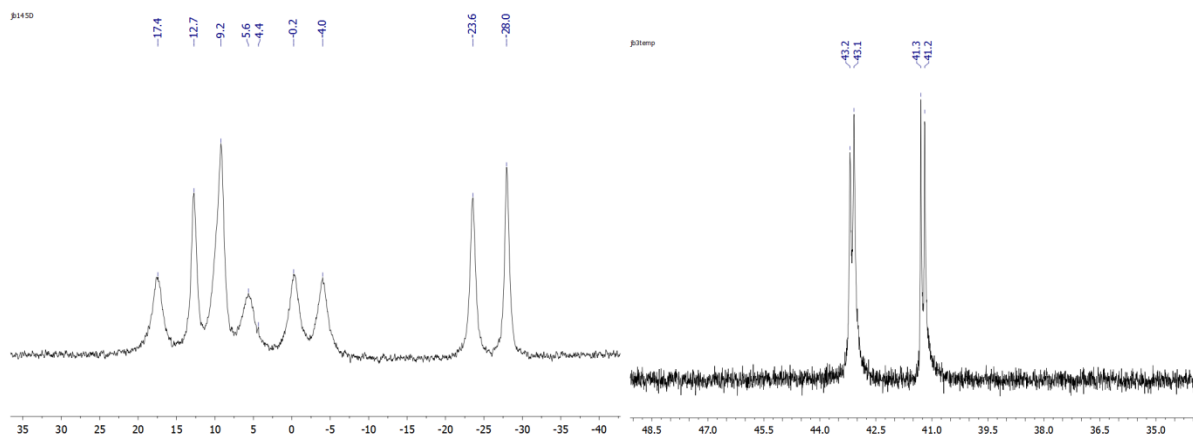

**Figure S6.** (left)  $^{11}\text{B}\{-^1\text{H}\}$  NMR spectrum for  $[6,6,6\text{-}(\text{PPh}_3)_2(\text{CO})\text{-nido-6-RuB}_9\text{H}_{13}]$  **3**, 192 MHz, and (right) 243 MHz  $^{31}\text{P}\{-^1\text{H}\}$  NMR spectrum, in  $\text{CD}_2\text{Cl}_2$ , at 292 K.



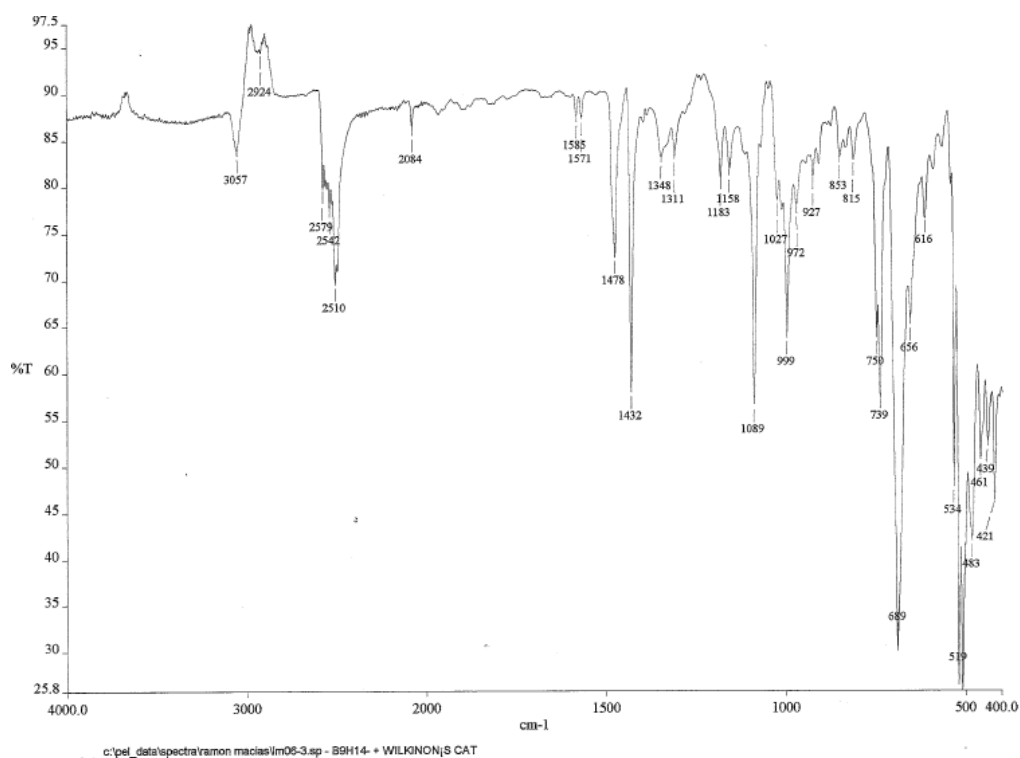

**Figure S7.** Infrared spectrum (ATR) for [6,6,6-(PPh<sub>3</sub>)<sub>2</sub>H-nido-6-RhB<sub>9</sub>H<sub>13</sub>] **2**.

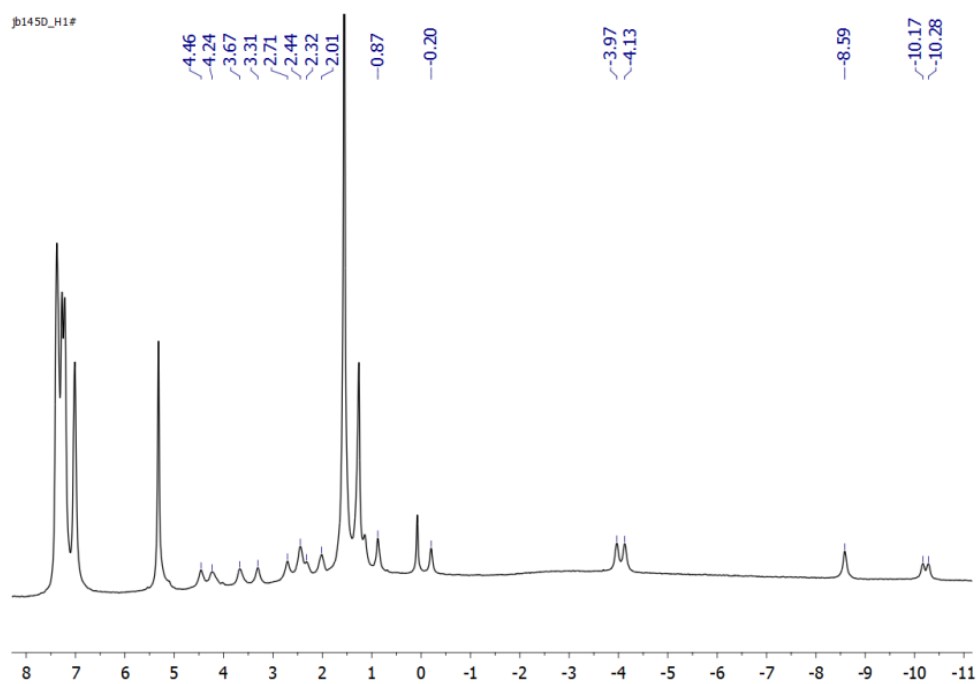

**Figure S8** <sup>1</sup>H-<sup>11</sup>B NMR spectrum for [6,6,6-(PPh<sub>3</sub>)<sub>2</sub>(CO)-nido6-RuB<sub>9</sub>H<sub>13</sub>] **3**, 400 MHz, CDCl<sub>3</sub>, 292 K.

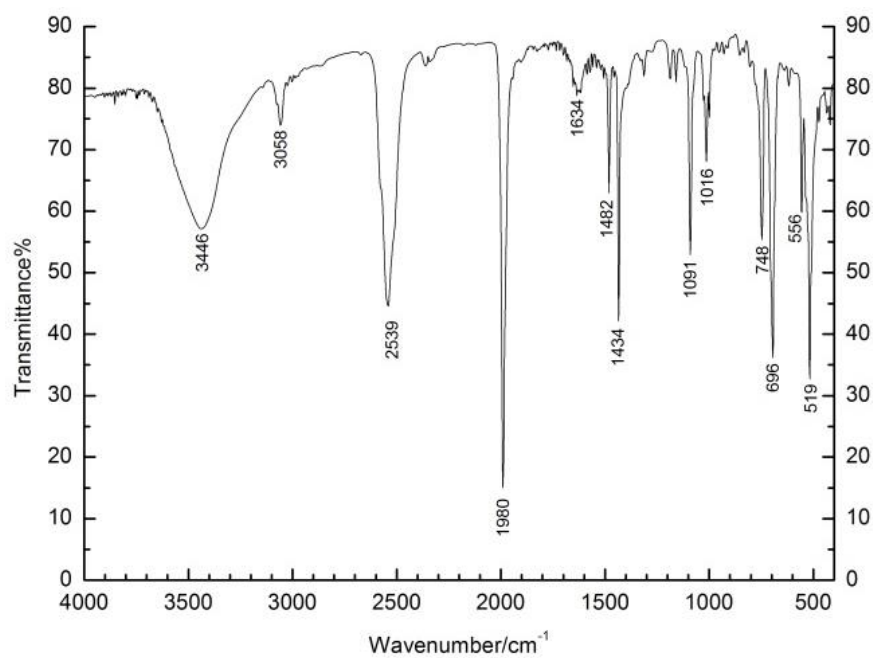

**Figure S9** IR spectrum of [6,6-(PPh<sub>3</sub>)<sub>2</sub>(CO)-nido6-RuB<sub>9</sub>H<sub>13</sub>] **3** (KBr disc).

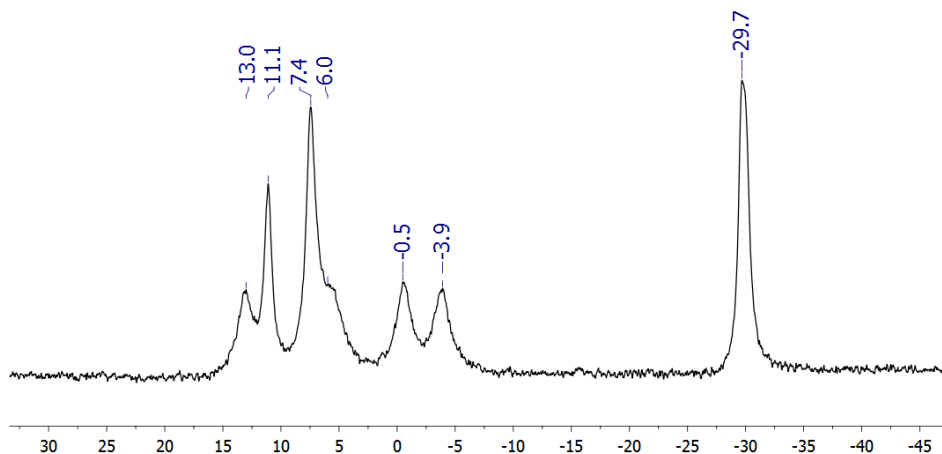

**Figure S10.**  $^{11}\text{B}\{-^1\text{H}\}$  NMR spectrum for  $[6,6,6\text{-}(\text{PPh}_3)_2(\text{CO})\text{-nido-6-OsB}_9\text{H}_{13}]$  **4** in  $\text{CD}_2\text{Cl}_2$ , 193 MHz, 292 K..

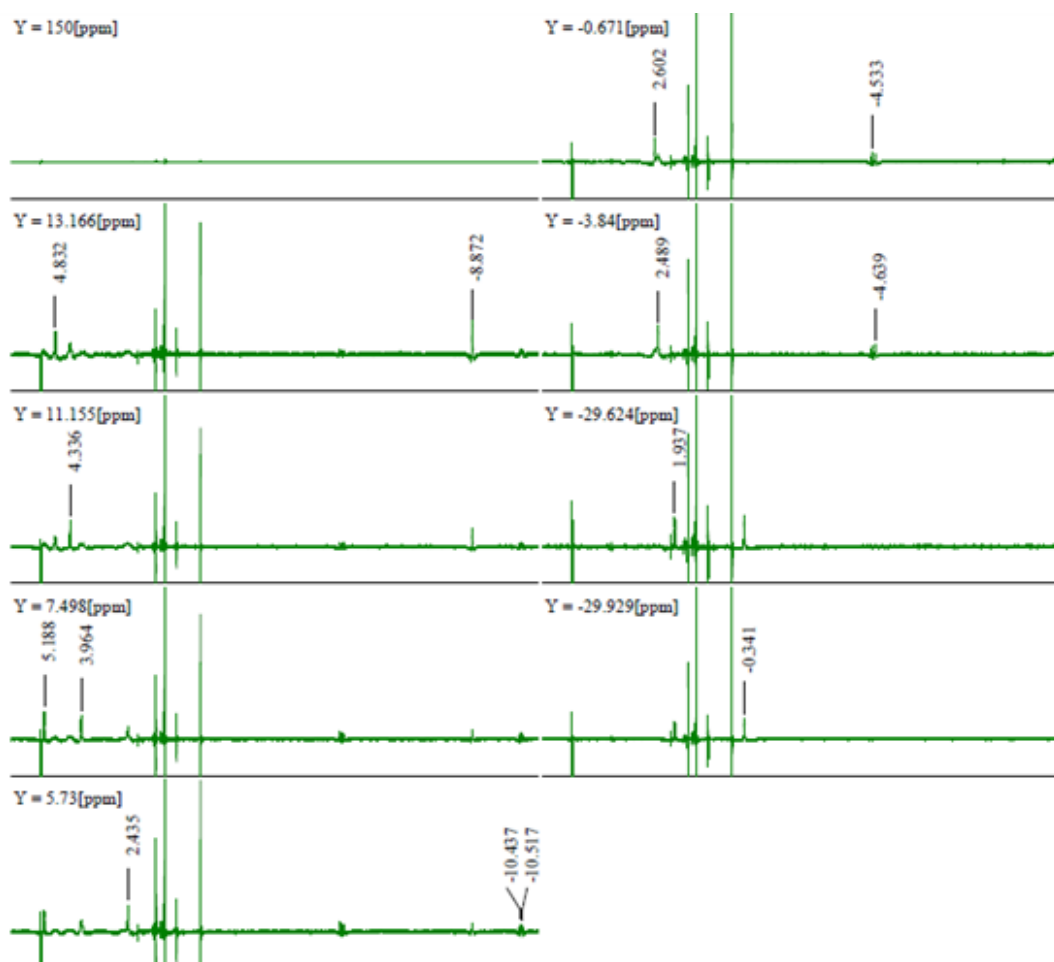

**Figure S11.**  $^1\text{H}\{-^{11}\text{B}_{\text{selective}}\}$  spectra for  $[6,6,6\text{-}(\text{PPh}_3)_2(\text{CO})\text{-nido-6-OsB}_9\text{H}_{13}]$  **3**,  $\text{CD}_2\text{Cl}_2$ , 298 K. 600MHz

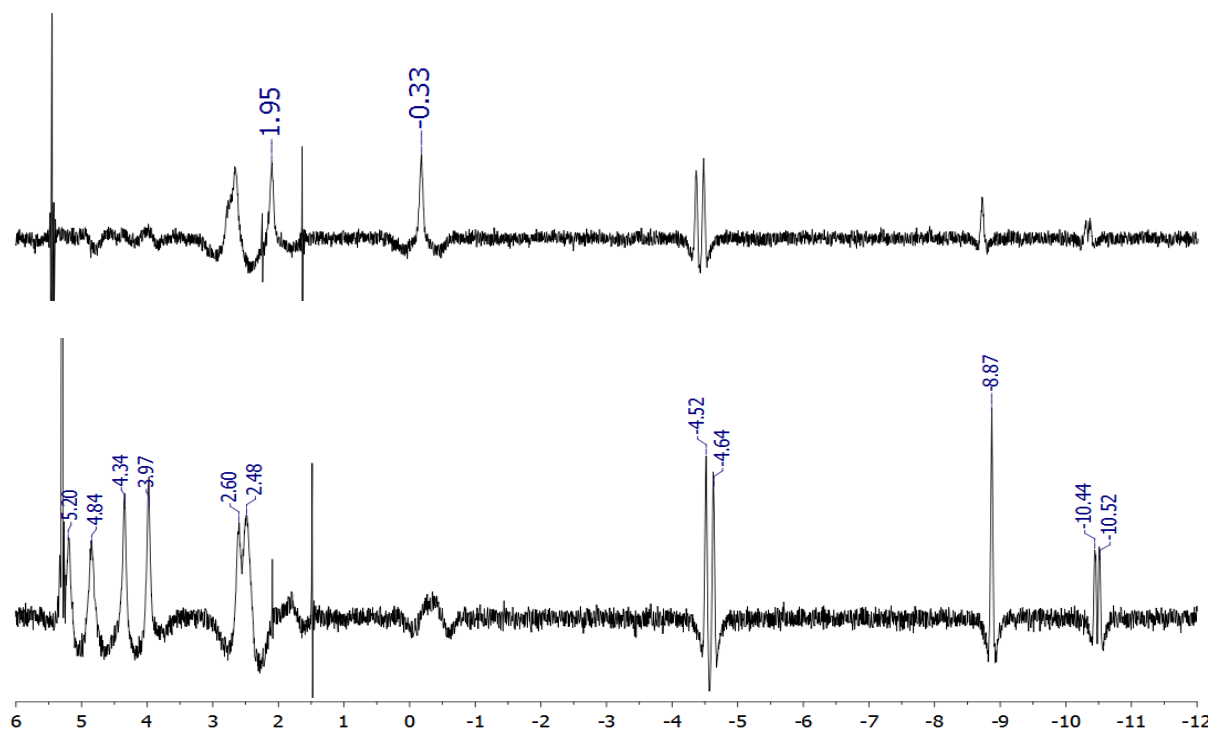

**Figure S12.** Subtracted  $^1\text{H}\{-^{11}\text{B}\}$  spectrum of  $[6,6,6\text{-}(\text{PPh}_3)_2(\text{CO})\text{-}n\text{ido-}6\text{-OsB}_9\text{H}_{13}]$  **4** obtained by subtracting the “off-resonance”  $^1\text{H}\{-^{11}\text{B}\}$  spectrum (i.e. with the boron decoupler set at +150 ppm) from the “on-resonance” (i.e. zero ppm)  $^1\text{H}\{-^{11}\text{B}\}$  spectrum in order to remove non-boron-coupled resonances such as solvent resonances. Broadband decoupling does not efficiently decouple all the resonances simultaneously and therefore the upper spectrum is with the ‘on resonance’ decoupler set at -30 ppm and the lower is with it set at +9 ppm. In  $\text{CD}_2\text{Cl}_2$  at 298K, 600 MHz.

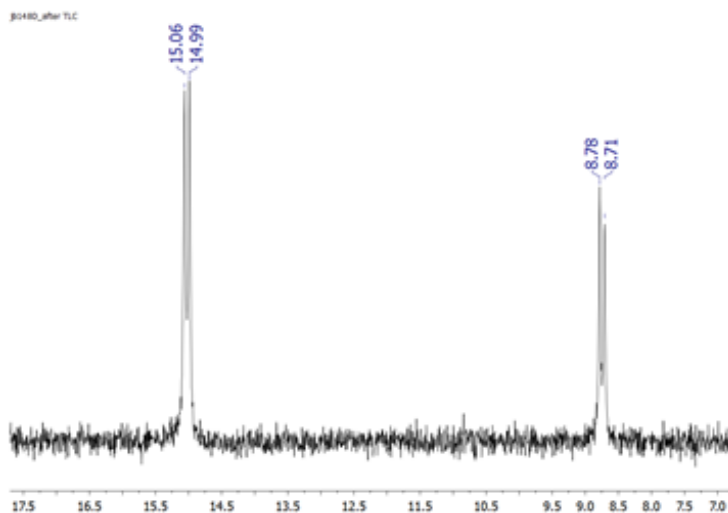

**Figure S13.**  $^{31}\text{P}\{-^1\text{H}\}$  NMR spectrum for  $[6,6,6\text{-}(\text{PPh}_3)_2(\text{CO})\text{-}n\text{ido-}6\text{-OsB}_9\text{H}_{13}]$  **4** in  $\text{CD}_2\text{Cl}_2$ , 243 MHz, 292 K.

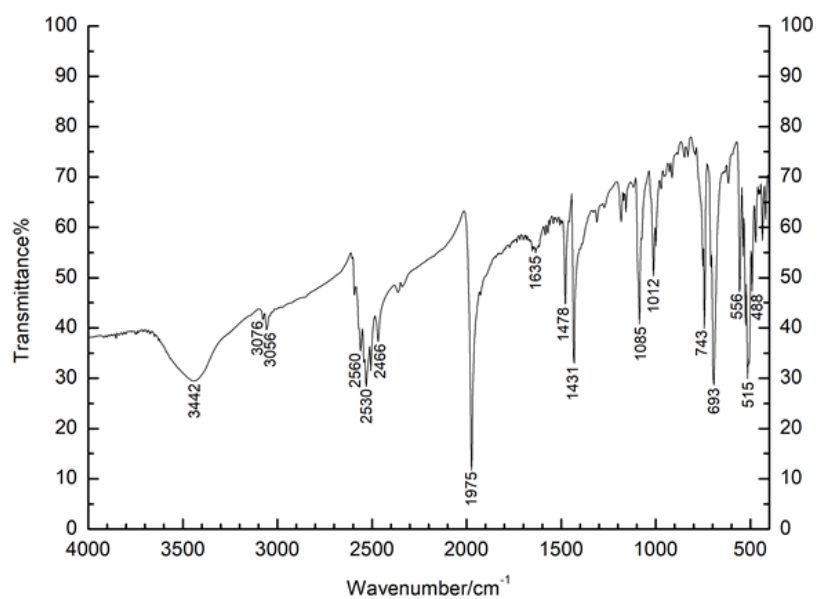

**Figure S14.** IR spectrum of [6,6,6-(PPh<sub>3</sub>)<sub>2</sub>(CO)-nido6-OsB<sub>9</sub>H<sub>13</sub>] **4** (KBr disc).

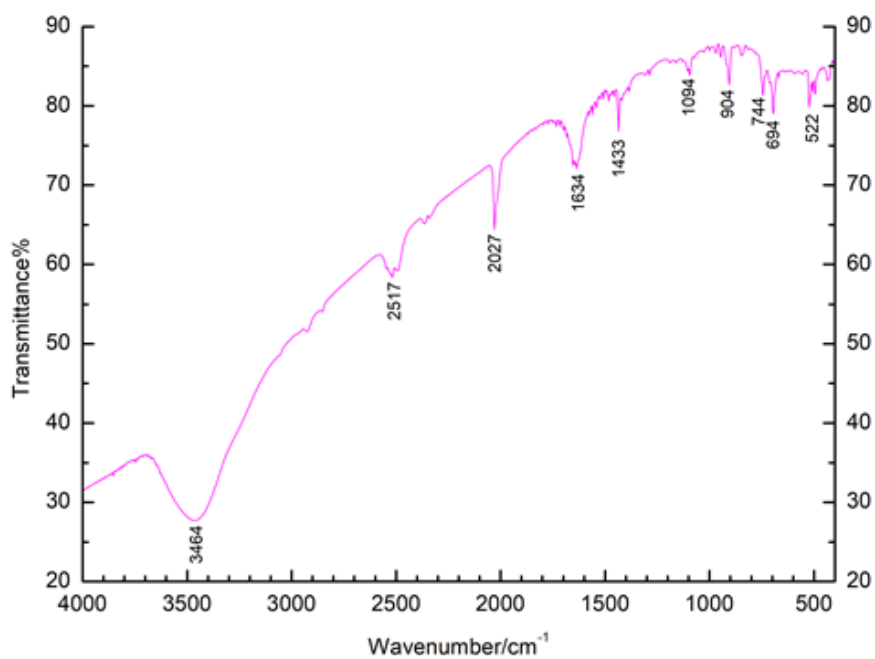

**Figure S15.** IR spectrum of [1,1,1-(CO)H(PPh<sub>3</sub>)-isocloso-1-RuB<sub>9</sub>H<sub>8</sub>-μ-(1,2)-{Pt(PMe<sub>2</sub>Ph)<sub>2</sub>}] **5** (KBr disc)

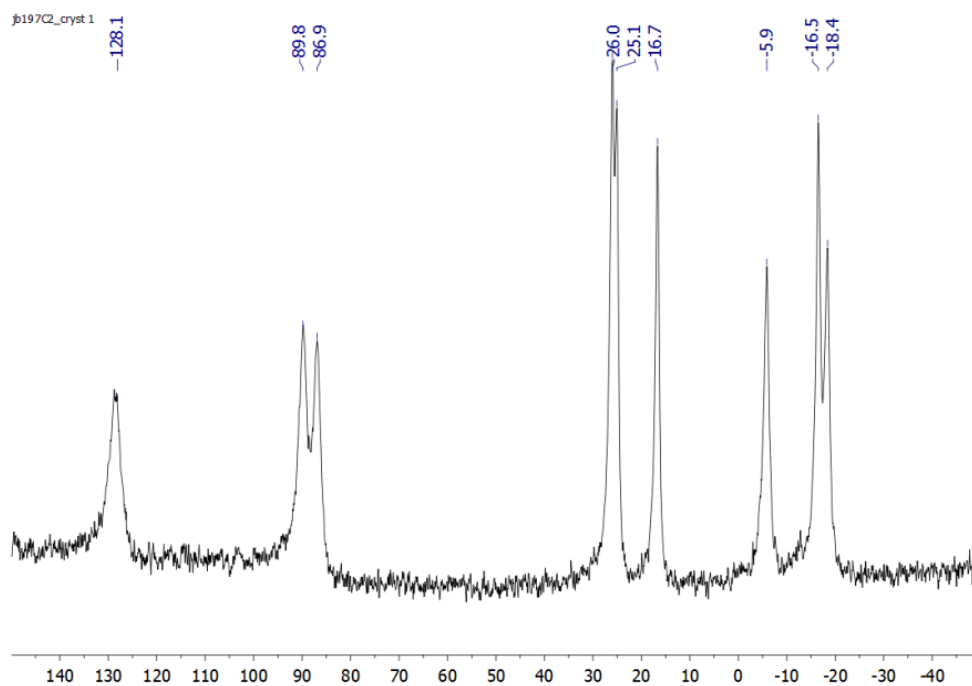

**Figure S16.**  $\{^{11}\text{B}\}$ - $^1\text{H}$ - NMR spectrum for  $[1,1,1\text{-}(\text{CO})\text{H}(\text{PPh}_3)\text{-isocloso-1-RuB}_9\text{H}_8\text{-}\mu\text{-}(1,2)\text{-}\{\text{Pt}(\text{PMe}_2\text{Ph})_2\}]$  **5**, 192 MHz,  $\text{CDCl}_3$ , 292 K.

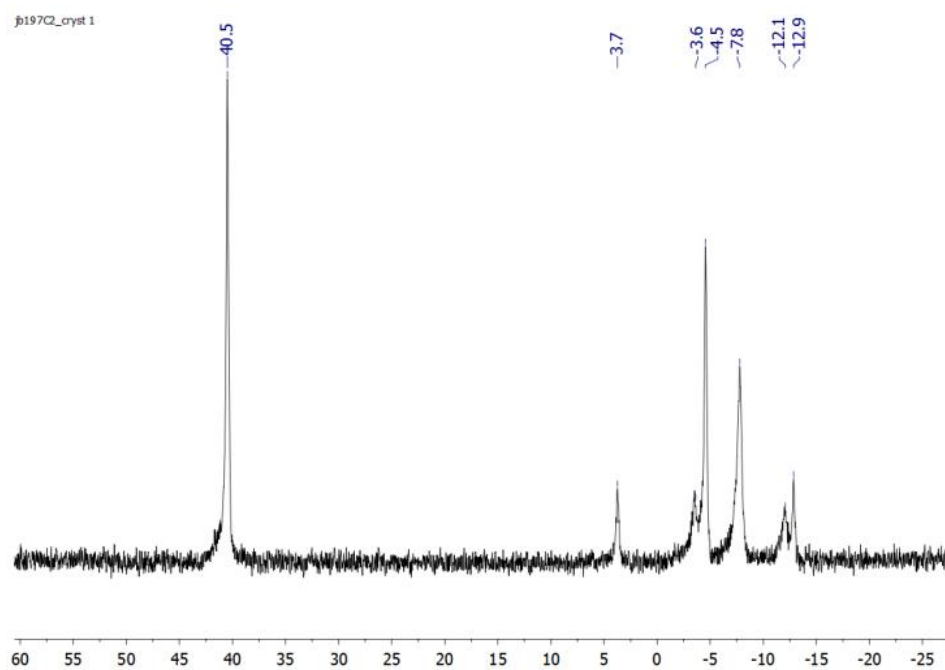

**Figure S17.**  $^{31}\text{P}$ - $\{^1\text{H}\}$  NMR spectrum for  $[1,1,1\text{-}(\text{CO})\text{H}(\text{PPh}_3)\text{-isocloso-1-RuB}_9\text{H}_8\text{-}\mu\text{-}(1,2)\text{-}\{\text{Pt}(\text{PMe}_2\text{Ph})_2\}]$  **5**, 243 MHz,  $\text{CDCl}_3$ , 203 K.

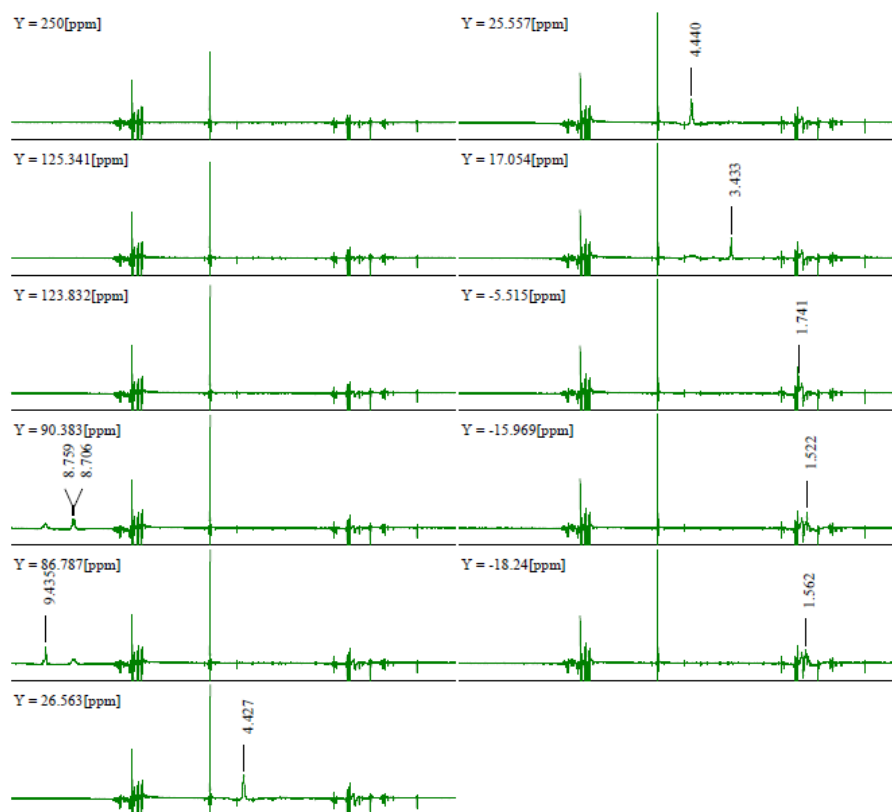

**Figure S18.**  $^1\text{H}\{-^{11}\text{B}_{\text{selective}}\}$  spectra for  $[1,1,1\text{-}(\text{CO})\text{H}(\text{PPh}_3)\text{-}i\text{so}\text{clo}\text{so}\text{-}1\text{-RuB}_9\text{H}_8\text{-}\mu\text{-}(1,2)\text{-}\{\text{Pt}(\text{PMe}_2\text{Ph})_2\}]$  **5**,  $\text{CD}_2\text{Cl}_2$ , 298 K. 600MHz.

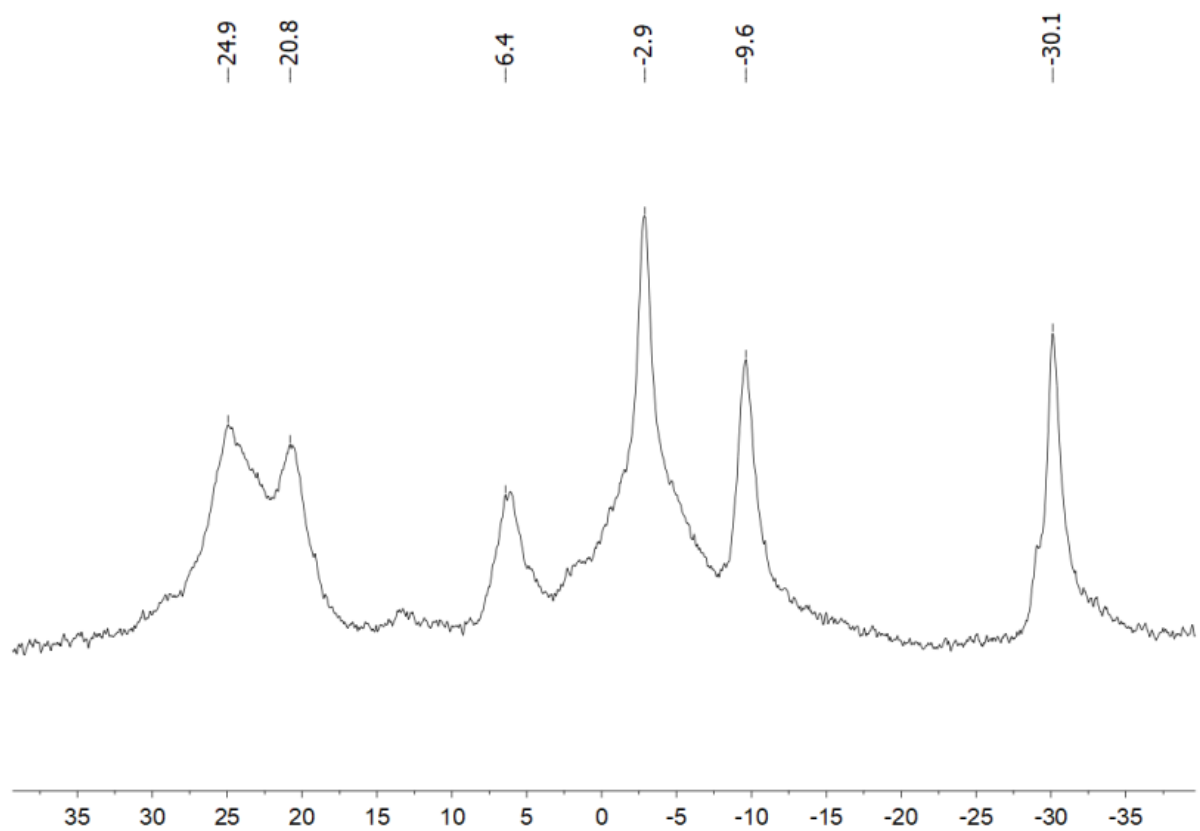

**Figure S19.**  $^{11}\text{B}\{-^1\text{H}\}$  NMR spectrum for  $[7,7\text{-}(\text{PMe}_2\text{Ph})_2\text{-}9,9,9\text{-}(\text{CO})(\text{PPh}_3)_2\text{-nido-}7,9\text{-PtOsB}_9\text{H}_{11}]\cdot\text{CH}_2\text{Cl}_2$  **6**



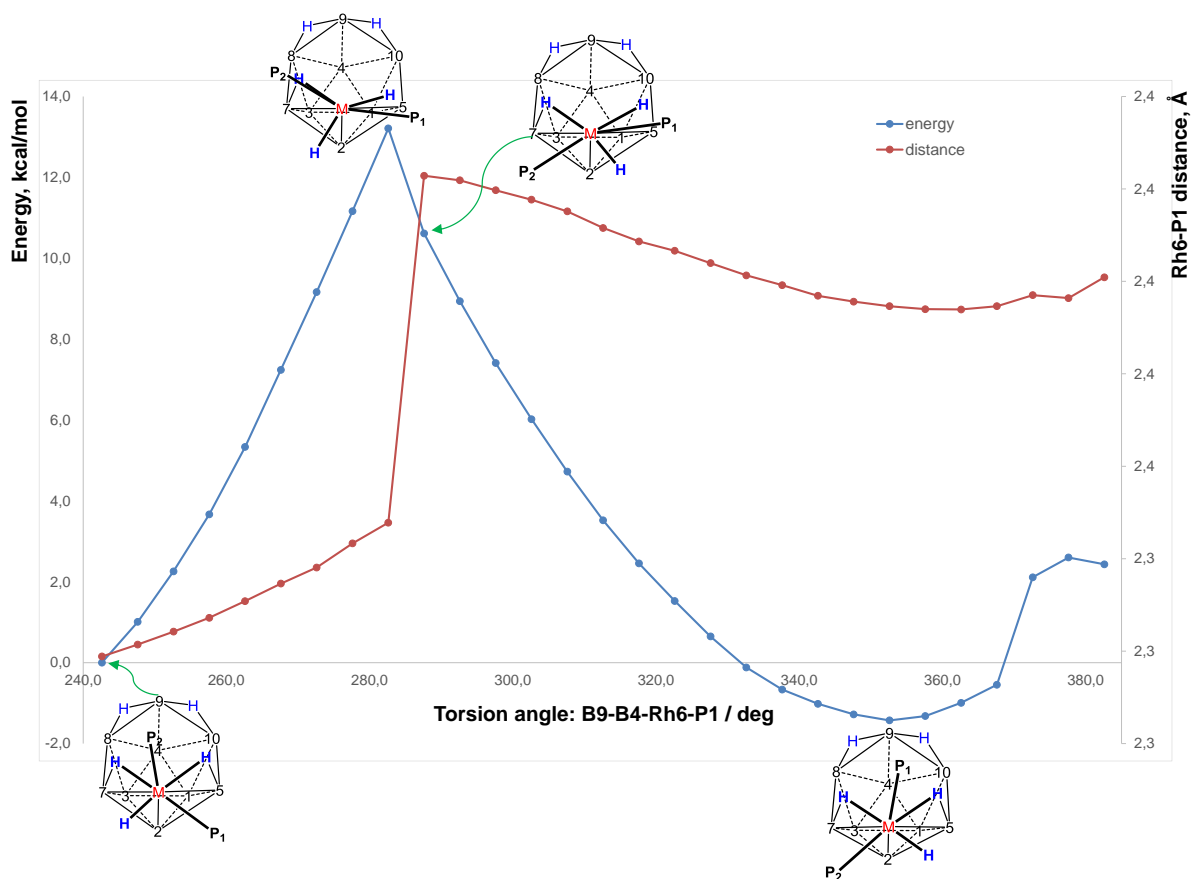

**Figure S20.** Variation of energy and the  $\text{PH}_3\text{-Rh6}$  distances in the PES scan upon the rotation of the  $\{\text{Rh}(\text{H})(\text{PH}_3)_2\}$  ligand sphere in  $[\text{6,6,6-}(\text{H})(\text{PH}_3)_2\text{-nido-RhB}_9\text{H}_{13}]$ , using as a reference the dihedral angle defined by  $\text{B9-B4-Rh6-P1}$ . (n.b. to reduce the computational load, H atoms were used instead of phenyl rings on the  $\text{PPh}_3$  ligand)

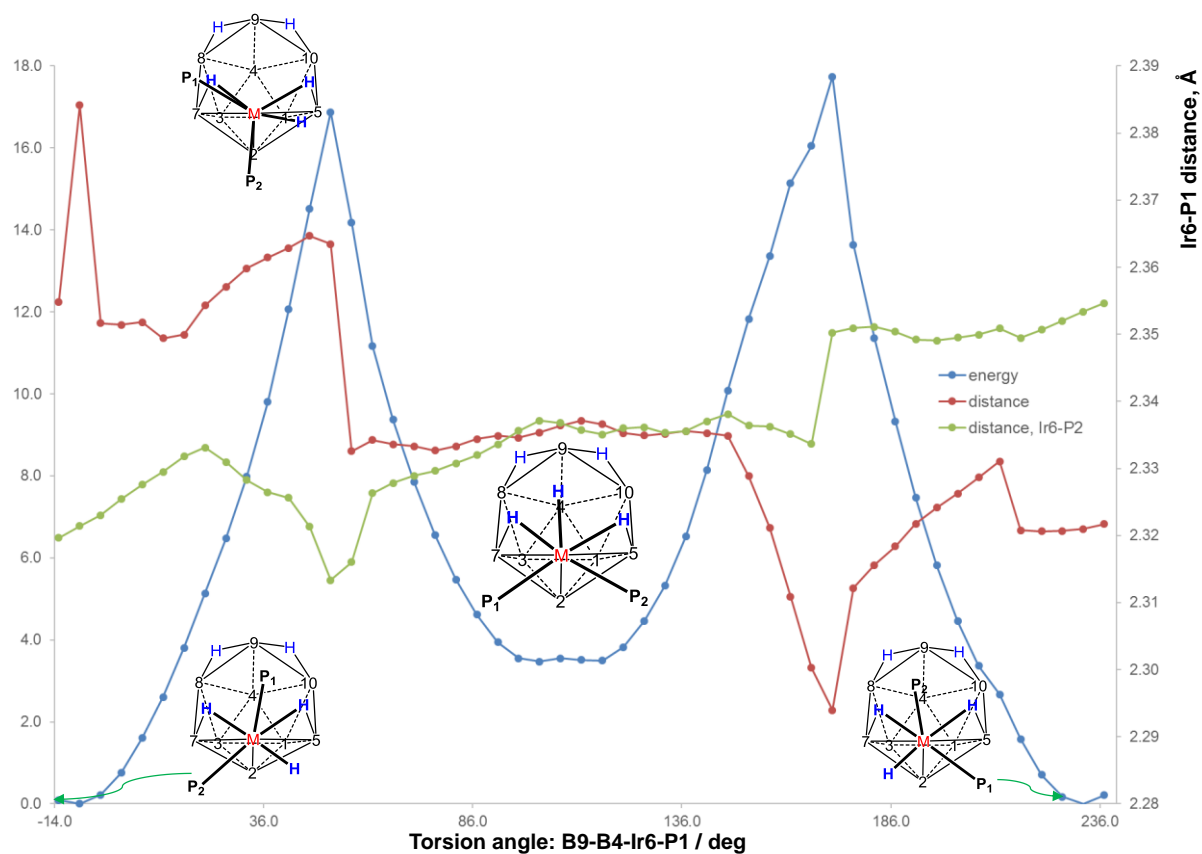

**Figure S21.** Variation of energy and the  $\text{PMe}_3\text{-Ir6}$  distances in the relaxed PES scan upon the rotation of the  $\{\text{Ir}(\text{H})(\text{PMe}_3)_2\}$  ligand sphere in  $[6,6,6\text{-}(\text{H})(\text{PMe}_3)_2\text{-}nido\text{-IrB}_9\text{H}_{13}]$ , using as a reference the dihedral angle defined by B9–B4–Ir6–P1.

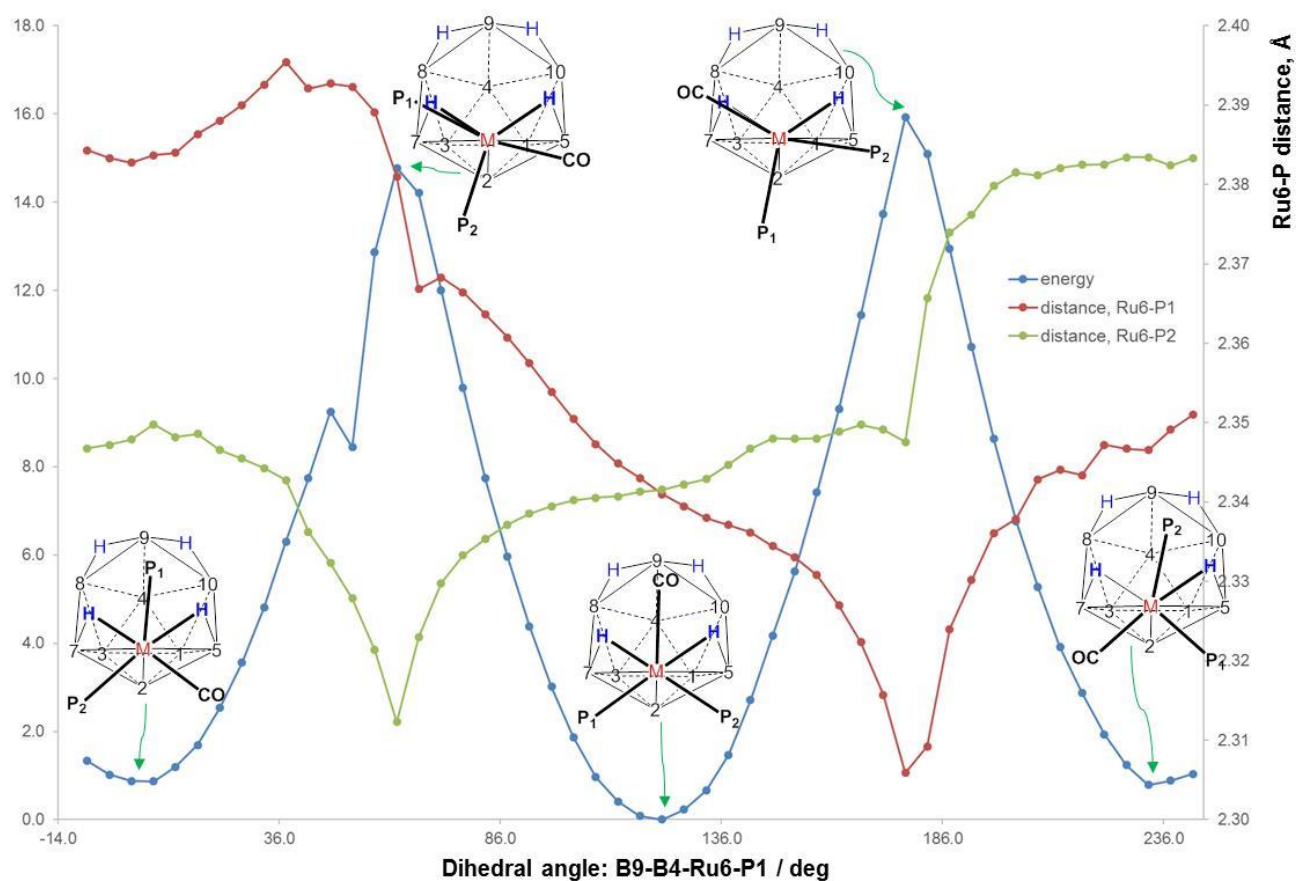

**Figure S22.** Variation of energy and the  $\text{PH}_3\text{-Ru}_6$  distances in the PES scan upon the rotation of the  $\{\text{Ru}(\text{CO})(\text{PH}_3)_2\}$  ligand sphere, in the  $\text{PH}_3$ -ligated ruthenadecaborane model,  $[\text{6,6-(CO)(PH}_3)_2\text{-nido-RuB}_9\text{H}_{13}]$ , using as a reference the dihedral angle defined by  $\text{B}_9\text{-B}_4\text{-Ru}_6\text{-P}_1$ . (n.b. to reduce the computational load, H atoms were used instead of phenyl rings on the  $\text{PPh}_3$  ligand)

## CRYSTALLOGRAPHIC DATA: DISTANCES AND ANGLES

### Twin analysis, resolution and refinement of the X-ray structure determination of compound 3

*Twin analysis.* The collected reflections were analysed with Cell Now<sup>i</sup> and were assigned to three different domains, 8.2% of the reflections remaining unassigned.

The following twin matrixes (real space) relate the encountered domains:

Domains 1 and 2 [1.000 -0.019 0.000 0.001 1.000 -0.003 0.002 -0.025 -1.000]

Domains 1 and 3 [0.448 -0.552 0.248 -1.446 -0.448 -0.247 -0.001 -0.002 -1.000]

Only contributions from domains 1 and 2 are significant:

18202 data (7549 unique) involve domain 1 only, mean I/sigma 9.4

22114 data (9024 unique) involve domain 2 only, mean I/sigma 6.3

42162 data (14645 unique) involve domain 3 only, mean I/sigma 0.5

35160 data (15710 unique) involve 2 domains, mean I/sigma 11.8

12070 data (6155 unique) involve 3 domains, mean I/sigma 12.9

3 data (3 unique) involve 4 domains, mean I/sigma 9.6

Both single and composite contributions from domains 1 and 2 were used.

Diffraction data have been corrected for absorption corrections with TWINABS.<sup>ii</sup>

*Resolution and refinement details.* The asymmetric unit contains two chemically equivalent molecules. B-H hydrogen atoms of molecule 1 were encountered in the Fourier difference map and were refined freely.

Molecule 2 presented static disorder. The disordered P(3) atom, the phenyl groups (C(39)>C(44), C(45)>C(50), C(51)>C(56), C(69)>C(74)) and the B9-cluster were included in the model using two sets of atomic coordinates with complementary occupancy factors (aprox. 0.50/0.50). AFIX, EADP and SADI restraints were used. Anisotropic refinement was applied to P(3), while disordered carbon and boron atoms were refined isotropically. C-H hydrogen atoms were included at calculated positions and refined according to the riding model. B-H hydrogen atoms were found in the difference Fourier map and refined using SADI restraints and fixed isotropic displacement parameter (1.2 times the equivalent Ueq for the C/B atom attached).

**Table S1.** Bond lengths [ $\text{\AA}$ ] and angles [ $^\circ$ ] for  $[6,6,6\text{-}(\text{CO})(\text{PPh}_3)_2\text{-nido-6-RuB}_9\text{H}_{13}]_3$  **3** with s.u.s. in parentheses

| Molecule 1        |           |                   |            |                   |           |
|-------------------|-----------|-------------------|------------|-------------------|-----------|
| B(1)-B(10)        | 1.750(4)  | B(4)-B(8)         | 1.782(4)   | B(9)-H(90B)       | 1.28(3)   |
| B(1)-B(2)         | 1.768(4)  | B(4)-B(9)         | 1.721(4)   | B(9)-H(9B)        | 1.06(3)   |
| B(1)-B(3)         | 1.787(4)  | B(4)-H(4B)        | 1.09(3)    | B(10)-H(10B)      | 1.06(3)   |
| B(1)-B(4)         | 1.789(4)  | B(5)-B(10)        | 2.003(4)   | B(10)-H(90B)      | 1.20(3)   |
| B(1)-B(5)         | 1.735(4)  | B(5)-H(5B)        | 1.11(3)    | C(1)-O(1)         | 1.146(3)  |
| B(1)-H(1B)        | 1.07(3)   | B(5)-H(65B)       | 1.22(3)    | C(1)-Ru(6)        | 1.873(3)  |
| B(2)-B(3)         | 1.777(4)  | B(5)-Ru(6)        | 2.305(3)   | C(2)-P(1)         | 1.839(2)  |
| B(2)-B(5)         | 1.810(4)  | B(7)-B(8)         | 2.031(4)   | C(8)-P(1)         | 1.848(2)  |
| B(2)-B(7)         | 1.826(4)  | B(7)-H(76B)       | 1.28(3)    | C(14)-P(1)        | 1.828(2)  |
| B(2)-H(2B)        | 1.05(3)   | B(7)-H(7B)        | 1.05(3)    | C(20)-P(2)        | 1.836(2)  |
| B(2)-Ru(6)        | 2.298(3)  | B(7)-Ru(6)        | 2.325(3)   | C(26)-P(2)        | 1.835(2)  |
| B(3)-B(4)         | 1.794(4)  | B(8)-B(9)         | 1.782(4)   | C(32)-P(2)        | 1.826(2)  |
| B(3)-B(7)         | 1.753(4)  | B(8)-H(89B)       | 1.23(3)    | P(1)-Ru(6)        | 2.3731(8) |
| B(3)-B(8)         | 1.745(4)  | B(8)-H(8B)        | 1.06(3)    | P(2)-Ru(6)        | 2.3806(8) |
| B(3)-H(3B)        | 1.11(3)   | B(9)-B(10)        | 1.792(4)   | Ru(6)-H(65B)      | 1.61(3)   |
| B(4)-B(10)        | 1.789(4)  | B(9)-H(89B)       | 1.27(3)    | Ru(6)-H(76B)      | 1.76(3)   |
| Molecule 2        |           |                   |            |                   |           |
| B(11A)-B(12A)     | 1.782(9)  | B(14A)-B(19A)     | 1.712(8)   | B(19A)-H(19X)     | 1.07(4)   |
| B(11A)-B(13A)     | 1.783(8)  | B(14A)-B(20A)     | 1.768(7)   | B(19A)-H(89X)     | 1.28(5)   |
| B(11A)-B(14A)     | 1.797(8)  | B(14A)-H(14X)     | 1.09(4)    | B(19A)-H(90X)     | 1.32(4)   |
| B(11A)-B(15A)     | 1.749(9)  | B(14B)-B(18B)     | 1.769(8)   | B(19B)-B(20B)     | 1.789(8)  |
| B(11A)-B(20A)     | 1.732(8)  | B(14B)-B(19B)     | 1.708(8)   | B(19B)-H(19Y)     | 1.07(4)   |
| B(11A)-H(11X)     | 1.10(4)   | B(14B)-B(20B)     | 1.781(7)   | B(19B)-H(89Y)     | 1.28(5)   |
| B(11B)-B(12B)     | 1.778(9)  | B(14B)-H(14Y)     | 1.09(4)    | B(19B)-H(90Y)     | 1.32(4)   |
| B(11B)-B(13B)     | 1.793(8)  | B(15A)-B(20A)     | 2.045(8)   | B(20A)-H(20X)     | 1.11(4)   |
| B(11B)-B(14B)     | 1.790(8)  | B(15A)-H(15X)     | 1.10(3)    | B(20A)-H(90X)     | 1.22(5)   |
| B(11B)-B(15B)     | 1.759(10) | B(15A)-H(56X)     | 1.26(3)    | B(20B)-H(20Y)     | 1.11(4)   |
| B(11B)-B(20B)     | 1.734(9)  | B(15A)-Ru(16)     | 2.419(7)   | B(20B)-H(90Y)     | 1.22(5)   |
| B(11B)-H(11Y)     | 1.10(4)   | B(15B)-B(20B)     | 2.044(8)   | C(38)-O(2)        | 1.144(3)  |
| B(12A)-B(13A)     | 1.773(9)  | B(15B)-H(15Y)     | 1.10(3)    | C(38)-Ru(16)      | 1.869(3)  |
| B(12A)-B(15A)     | 1.818(13) | B(15B)-H(56Y)     | 1.26(3)    | C(57)-P(4)        | 1.831(2)  |
| B(12A)-B(17A)     | 1.808(11) | B(15B)-Ru(16)     | 2.203(8)   | C(63)-P(4)        | 1.838(3)  |
| B(12A)-H(12X)     | 1.09(3)   | B(17A)-B(18A)     | 2.022(8)   | C(69A)-P(4)       | 1.855(3)  |
| B(12A)-Ru(16)     | 2.341(10) | B(17A)-H(17X)     | 1.08(3)    | C(69B)-P(4)       | 1.831(3)  |
| B(12B)-B(13B)     | 1.779(9)  | B(17A)-H(76X)     | 1.37(3)    | P(3A)-C(39A)      | 1.849(7)  |
| B(12B)-B(15B)     | 1.811(14) | B(17A)-Ru(16)     | 2.365(7)   | P(3A)-C(45A)      | 1.858(6)  |
| B(12B)-B(17B)     | 1.808(13) | B(17B)-B(18B)     | 2.009(8)   | P(3A)-C(51A)      | 1.852(7)  |
| B(12B)-H(12Y)     | 1.09(3)   | B(17B)-H(17Y)     | 1.08(3)    | P(3A)-Ru(16)      | 2.382(8)  |
| B(12B)-Ru(16)     | 2.248(11) | B(17B)-H(76Y)     | 1.37(3)    | P(3B)-C(39B)      | 1.866(8)  |
| B(13A)-B(14A)     | 1.793(7)  | B(17B)-Ru(16)     | 2.250(7)   | P(3B)-C(45B)      | 1.851(7)  |
| B(13A)-B(17A)     | 1.715(9)  | B(18A)-B(19A)     | 1.781(7)   | P(3B)-C(51B)      | 1.849(8)  |
| B(13A)-B(18A)     | 1.755(9)  | B(18A)-H(18X)     | 1.14(4)    | P(3B)-Ru(16)      | 2.353(9)  |
| B(13A)-H(13X)     | 1.12(3)   | B(18A)-H(89X)     | 1.23(4)    | P(4)-Ru(16)       | 2.3871(8) |
| B(13B)-B(14B)     | 1.789(7)  | B(18B)-B(19B)     | 1.792(7)   | Ru(16)-H(56X)     | 1.77(3)   |
| B(13B)-B(17B)     | 1.728(10) | B(18B)-H(18Y)     | 1.13(4)    | Ru(16)-H(56Y)     | 1.77(3)   |
| B(13B)-B(18B)     | 1.731(9)  | B(18B)-H(89Y)     | 1.23(4)    | Ru(16)-H(76X)     | 1.67(3)   |
| B(13B)-H(13Y)     | 1.12(3)   | B(19A)-B(20A)     | 1.786(7)   | Ru(16)-H(76Y)     | 1.68(3)   |
| B(14A)-B(18A)     | 1.763(8)  |                   |            |                   |           |
| Molecule 1        |           |                   |            |                   |           |
| B(2)-Ru(6)-B(5)   | 46.32(9)  | B(5)-Ru(6)-P(1)   | 115.99(7)  | C(1)-Ru(6)-H(65B) | 92.3(12)  |
| B(2)-Ru(6)-B(7)   | 46.51(9)  | B(5)-Ru(6)-P(2)   | 142.43(6)  | C(1)-Ru(6)-H(76B) | 173.2(9)  |
| B(2)-Ru(6)-H(65B) | 71.9(12)  | B(7)-Ru(6)-H(65B) | 87.6(12)   | C(1)-Ru(6)-P(1)   | 93.37(7)  |
| B(2)-Ru(6)-H(76B) | 76.7(9)   | B(7)-Ru(6)-H(76B) | 33.0(9)    | C(1)-Ru(6)-P(2)   | 89.65(7)  |
| B(2)-Ru(6)-P(1)   | 157.33(6) | B(7)-Ru(6)-P(1)   | 125.66(7)  | P(1)-Ru(6)-H(65B) | 87.5(12)  |
| B(2)-Ru(6)-P(2)   | 99.61(7)  | B(7)-Ru(6)-P(2)   | 85.62(7)   | P(1)-Ru(6)-H(76B) | 92.6(9)   |
| B(5)-Ru(6)-B(7)   | 79.40(9)  | C(1)-Ru(6)-B(2)   | 96.58(10)  | P(1)-Ru(6)-P(2)   | 100.77(3) |
| B(5)-Ru(6)-H(65B) | 30.3(12)  | C(1)-Ru(6)-B(5)   | 81.11(10)  | P(2)-Ru(6)-H(65B) | 171.4(12) |
| B(5)-Ru(6)-H(76B) | 93.4(9)   | C(1)-Ru(6)-B(7)   | 140.89(10) | P(2)-Ru(6)-H(76B) | 92.3(9)   |
| Molecule 2        |           |                   |            |                   |           |

|                      |           |                      |            |                      |            |
|----------------------|-----------|----------------------|------------|----------------------|------------|
| B(12A)-Ru(16)-B(15A) | 44.9(3)   | C(38)-Ru(16)-B(12A)  | 97.3(2)    | C(38)-Ru(16)-P(3A)   | 96.54(16)  |
| B(12A)-Ru(16)-B(17A) | 45.2(3)   | C(38)-Ru(16)-B(12B)  | 96.9(3)    | C(38)-Ru(16)-P(3B)   | 90.48(17)  |
| B(12A)-Ru(16)-H(56X) | 73.9(13)  | C(38)-Ru(16)-B(15A)  | 139.82(19) | C(38)-Ru(16)-P(4)    | 90.19(8)   |
| B(12A)-Ru(16)-H(76X) | 75.0(14)  | C(38)-Ru(16)-B(15B)  | 142.8(2)   | H(56X)-Ru(16)-H(76X) | 86(3)      |
| B(12A)-Ru(16)-P(3A)  | 153.6(3)  | C(38)-Ru(16)-B(17A)  | 84.49(18)  | H(56Y)-Ru(16)-H(76Y) | 84(3)      |
| B(12A)-Ru(16)-P(4)   | 99.7(2)   | C(38)-Ru(16)-B(17B)  | 77.8(2)    | H(65B)-Ru(6)-H(76B)  | 84.8(15)   |
| B(12B)-Ru(16)-B(17B) | 47.4(3)   | C(38)-Ru(16)-H(56X)  | 169.5(13)  | P(3A)-Ru(16)-B(15A)  | 123.4(2)   |
| B(12B)-Ru(16)-H(56Y) | 78.5(14)  | C(38)-Ru(16)-H(56Y)  | 173(2)     | P(3A)-Ru(16)-H(56X)  | 93.8(12)   |
| B(12B)-Ru(16)-H(76Y) | 79.6(16)  | C(38)-Ru(16)-H(76X)  | 97(2)      | P(3A)-Ru(16)-H(76X)  | 81.0(12)   |
| B(12B)-Ru(16)-P(3B)  | 157.4(3)  | C(38)-Ru(16)-H(76Y)  | 90(3)      | P(3A)-Ru(16)-P(4)    | 102.55(16) |
| B(12B)-Ru(16)-P(4)   | 102.2(3)  | B(17A)-Ru(16)-B(15A) | 76.0(2)    | P(3B)-Ru(16)-H(56Y)  | 92.0(12)   |
| B(15A)-Ru(16)-H(56X) | 30.2(11)  | B(17A)-Ru(16)-H(56X) | 93.0(18)   | P(3B)-Ru(16)-H(76Y)  | 79.1(14)   |
| B(15A)-Ru(16)-H(76X) | 86(2)     | B(17A)-Ru(16)-H(76X) | 34.7(11)   | P(3B)-Ru(16)-P(4)    | 99.16(18)  |
| B(15B)-Ru(16)-B(12B) | 48.0(3)   | B(17A)-Ru(16)-P(3A)  | 114.5(2)   | P(4)-Ru(16)-B(15A)   | 85.15(16)  |
| B(15B)-Ru(16)-B(17B) | 83.2(3)   | B(17A)-Ru(16)-P(4)   | 142.95(15) | P(4)-Ru(16)-H(56X)   | 85.7(19)   |
| B(15B)-Ru(16)-H(56Y) | 34.8(11)  | B(17B)-Ru(16)-H(56Y) | 95(2)      | P(4)-Ru(16)-H(56Y)   | 96(2)      |
| B(15B)-Ru(16)-H(76Y) | 94(3)     | B(17B)-Ru(16)-H(76Y) | 37.5(11)   | P(4)-Ru(16)-H(76X)   | 171(2)     |
| B(15B)-Ru(16)-P(3B)  | 126.6(3)  | B(17B)-Ru(16)-P(3B)  | 114.5(3)   | P(4)-Ru(16)-H(76Y)   | 178.2(15)  |
| B(15B)-Ru(16)-P(4)   | 86.80(19) | B(17B)-Ru(16)-P(4)   | 144.10(18) |                      |            |

**Table S2** Bond lengths [ $\text{\AA}$ ] and angles [ $^\circ$ ] for [1,1,1-(CO)H(PPh<sub>3</sub>)-*isocloso*-1-RuB<sub>9</sub>H<sub>8</sub>- $\mu$ -(1,2)-{Pt(PMe<sub>2</sub>Ph)<sub>2</sub>}] (**5**) with s.u.s. in parentheses

|           |            |           |            |
|-----------|------------|-----------|------------|
| Pt1–Ru1   | 2.9152(3)  | Pt1–H1    | 1.65(6)    |
| Pt1–B2    | 2.032(4)   | Pt1–P1    | 2.3397(9)  |
| Pt1–P2    | 2.2426(10) | Ru1–H1    | 1.93(6)    |
| Ru1–B2    | 2.091(4)   | Ru1–B3    | 2.183(5)   |
| Ru1–B4    | 2.191(4)   | Ru1–B5    | 2.412(5)   |
| Ru1–B6    | 2.424(4)   | Ru1–B7    | 2.438(4)   |
| Ru1–C1    | 1.950(4)   | Ru1–P3    | 2.4169(10) |
| B2–B5     | 1.757(6)   | B2–B7     | 1.745(6)   |
| B2–B8     | 1.733(6)   | B3–H3     | 1.21(5)    |
| B3–B5     | 1.734(6)   | B3–B6     | 1.729(7)   |
| B3–B9     | 1.742(7)   | B4–H4     | 1.12(5)    |
| B4–B6     | 1.729(7)   | B4–B7     | 1.733(6)   |
| B4–B10    | 1.747(7)   | B5–H5     | 1.05(5)    |
| B5–B8     | 1.804(7)   | B5–B9     | 1.790(6)   |
| B6–H6     | 1.10(5)    | B6–B9     | 1.816(7)   |
| B6–B10    | 1.817(7)   | B7–H7     | 1.06(5)    |
| B7–B8     | 1.806(6)   | B7–B10    | 1.782(6)   |
| B8–H8     | 1.10(5)    | B8–B9     | 1.806(6)   |
| B8–B10    | 1.798(6)   | B9–H9     | 1.12(5)    |
| B9–B10    | 1.801(7)   | B10–H10   | 1.06(5)    |
| C1–O1     | 1.135(6)   | P1–C11    | 1.821(4)   |
| P1–C17    | 1.823(4)   | P1–C18    | 1.822(4)   |
| C11–C12   | 1.398(6)   | C11–C16   | 1.399(6)   |
| C12–H12   | 0.950      | C12–C13   | 1.380(7)   |
| C13–H13   | 0.950      | C13–C14   | 1.388(7)   |
| C14–H14   | 0.950      | C14–C15   | 1.374(8)   |
| C15–H15   | 0.950      | C15–C16   | 1.388(7)   |
| C16–H16   | 0.950      | C17–H17A  | 0.980      |
| C17–H17B  | 0.980      | C17–H17C  | 0.980      |
| C18–H18A  | 0.980      | C18–H18B  | 0.980      |
| C18–H18C  | 0.980      | P2–C21    | 1.823(4)   |
| P2–C27    | 1.822(5)   | P2–C28    | 1.806(5)   |
| C21–C22   | 1.392(6)   | C21–C26   | 1.400(6)   |
| C22–H22   | 0.950      | C22–C23   | 1.389(7)   |
| C23–H23   | 0.950      | C23–C24   | 1.381(8)   |
| C24–H24   | 0.950      | C24–C25   | 1.382(8)   |
| C25–H25   | 0.950      | C25–C26   | 1.388(7)   |
| C26–H26   | 0.950      | C27–H27A  | 0.980      |
| C27–H27B  | 0.980      | C27–H27C  | 0.980      |
| C28–H28A  | 0.980      | C28–H28B  | 0.980      |
| C28–H28C  | 0.980      | P3–C311   | 1.829(4)   |
| P3–C321   | 1.824(4)   | P3–C331   | 1.838(4)   |
| C311–C312 | 1.381(6)   | C311–C316 | 1.400(6)   |
| C312–H312 | 0.950      | C312–C313 | 1.394(6)   |
| C313–H313 | 0.950      | C313–C314 | 1.375(7)   |
| C314–H314 | 0.950      | C314–C315 | 1.386(7)   |
| C315–H315 | 0.950      | C315–C316 | 1.379(6)   |
| C316–H316 | 0.950      | C321–C322 | 1.392(6)   |
| C321–C326 | 1.398(6)   | C322–H322 | 0.950      |
| C322–C323 | 1.382(7)   | C323–H323 | 0.950      |
| C323–C324 | 1.387(8)   | C324–H324 | 0.950      |
| C324–C325 | 1.374(7)   | C325–H325 | 0.950      |

|            |            |            |            |
|------------|------------|------------|------------|
| C325–C326  | 1.383(6)   | C326–H326  | 0.950      |
| C331–C332  | 1.387(6)   | C331–C336  | 1.387(6)   |
| C332–H332  | 0.950      | C332–C333  | 1.392(6)   |
| C333–H333  | 0.950      | C333–C334  | 1.380(7)   |
| C334–H334  | 0.950      | C334–C335  | 1.385(7)   |
| C335–H335  | 0.950      | C335–C336  | 1.388(6)   |
| C336–H336  | 0.950      |            |            |
| Ru1–Pt1–H1 | 39(2)      | Ru1–Pt1–B2 | 45.83(12)  |
| Ru1–Pt1–P1 | 120.94(3)  | Ru1–Pt1–P2 | 133.14(3)  |
| H1–Pt1–B2  | 85(2)      | H1–Pt1–P1  | 83(2)      |
| H1–Pt1–P2  | 172(2)     | B2–Pt1–P1  | 165.80(12) |
| B2–Pt1–P2  | 87.36(12)  | P1–Pt1–P2  | 105.36(3)  |
| Pt1–Ru1–H1 | 32.5(19)   | Pt1–Ru1–B2 | 44.18(11)  |
| Pt1–Ru1–B3 | 116.71(12) | Pt1–Ru1–B4 | 119.65(12) |
| Pt1–Ru1–B5 | 75.19(10)  | Pt1–Ru1–B6 | 138.48(11) |
| Pt1–Ru1–B7 | 77.84(10)  | Pt1–Ru1–C1 | 98.57(12)  |
| Pt1–Ru1–P3 | 106.43(2)  | H1–Ru1–B2  | 76.6(19)   |
| H1–Ru1–B3  | 134.8(18)  | H1–Ru1–B4  | 133.7(18)  |
| H1–Ru1–B5  | 102.9(19)  | H1–Ru1–B6  | 170.9(19)  |
| H1–Ru1–B7  | 102.5(18)  | H1–Ru1–C1  | 78.5(18)   |
| H1–Ru1–P3  | 80.4(19)   | B2–Ru1–B3  | 87.65(18)  |
| B2–Ru1–B4  | 86.71(17)  | B2–Ru1–B5  | 45.24(16)  |
| B2–Ru1–B6  | 94.41(17)  | B2–Ru1–B7  | 44.50(15)  |
| B2–Ru1–C1  | 126.32(17) | B2–Ru1–P3  | 132.24(12) |
| B3–Ru1–B4  | 86.07(17)  | B3–Ru1–B5  | 43.98(16)  |
| B3–Ru1–B6  | 43.69(17)  | B3–Ru1–B7  | 94.30(17)  |
| B3–Ru1–C1  | 77.69(18)  | B3–Ru1–P3  | 136.00(13) |
| B4–Ru1–B5  | 94.31(16)  | B4–Ru1–B6  | 43.64(17)  |
| B4–Ru1–B7  | 43.57(15)  | B4–Ru1–C1  | 141.73(17) |
| B4–Ru1–P3  | 79.83(12)  | B5–Ru1–B6  | 70.25(16)  |
| B5–Ru1–B7  | 71.46(16)  | B5–Ru1–C1  | 97.36(17)  |
| B5–Ru1–P3  | 173.98(12) | B6–Ru1–B7  | 69.96(16)  |
| B6–Ru1–C1  | 107.89(17) | B6–Ru1–P3  | 105.83(12) |
| B7–Ru1–C1  | 168.77(16) | B7–Ru1–P3  | 103.04(11) |
| C1–Ru1–P3  | 88.17(13)  | Pt1–B2–Ru1 | 89.98(17)  |
| Pt1–B2–B5  | 119.4(3)   | Pt1–B2–B7  | 127.1(3)   |
| Pt1–B2–B8  | 162.6(3)   | Ru1–B2–B5  | 77.1(2)    |
| Ru1–B2–B7  | 78.3(2)    | Ru1–B2–B8  | 106.9(2)   |
| B5–B2–B7   | 107.9(3)   | B5–B2–B8   | 62.3(3)    |
| B7–B2–B8   | 62.6(3)    | Ru1–B3–H3  | 125(3)     |
| Ru1–B3–B5  | 75.0(2)    | Ru1–B3–B6  | 75.6(2)    |
| Ru1–B3–B9  | 104.0(3)   | H3–B3–B5   | 128(2)     |
| H3–B3–B6   | 124(2)     | H3–B3–B9   | 131(3)     |
| B5–B3–B6   | 106.9(4)   | B5–B3–B9   | 62.0(3)    |
| B6–B3–B9   | 63.1(3)    | Ru1–B4–H4  | 130(2)     |
| Ru1–B4–B6  | 75.4(2)    | Ru1–B4–B7  | 75.8(2)    |
| Ru1–B4–B10 | 103.7(3)   | H4–B4–B6   | 126(3)     |
| H4–B4–B7   | 124(3)     | H4–B4–B10  | 126(2)     |
| B6–B4–B7   | 107.2(3)   | B6–B4–B10  | 63.0(3)    |
| B7–B4–B10  | 61.6(3)    | Ru1–B5–B2  | 57.69(19)  |
| Ru1–B5–B3  | 61.0(2)    | Ru1–B5–H5  | 130(3)     |
| Ru1–B5–B8  | 92.7(2)    | Ru1–B5–B9  | 94.1(2)    |
| B2–B5–B3   | 116.0(3)   | B2–B5–H5   | 117(3)     |
| B2–B5–B8   | 58.2(3)    | B2–B5–B9   | 108.8(3)   |



|             |            |               |            |
|-------------|------------|---------------|------------|
| B3-B5-H5    | 115(3)     | B3-B5-B8      | 110.2(3)   |
| B3-B5-B9    | 59.2(3)    | H5-B5-B8      | 129(3)     |
| H5-B5-B9    | 128(3)     | B8-B5-B9      | 60.3(2)    |
| Ru1-B6-B3   | 60.7(2)    | Ru1-B6-B4     | 60.99(19)  |
| Ru1-B6-H6   | 133(3)     | Ru1-B6-B9     | 93.0(2)    |
| Ru1-B6-B10  | 93.1(2)    | B3-B6-B4      | 119.4(3)   |
| B3-B6-H6    | 116(3)     | B3-B6-B9      | 58.8(3)    |
| B3-B6-B10   | 109.7(3)   | B4-B6-H6      | 115(3)     |
| B4-B6-B9    | 109.9(3)   | B4-B6-B10     | 59.0(3)    |
| H6-B6-B9    | 127(3)     | H6-B6-B10     | 127(3)     |
| B9-B6-B10   | 59.4(3)    | Ru1-B7-B2     | 57.16(18)  |
| Ru1-B7-B4   | 60.6(2)    | Ru1-B7-H7     | 131(3)     |
| Ru1-B7-B8   | 91.8(2)    | Ru1-B7-B10    | 93.6(2)    |
| B2-B7-B4    | 115.5(3)   | B2-B7-H7      | 115(2)     |
| B2-B7-B8    | 58.4(2)    | B2-B7-B10     | 108.8(3)   |
| B4-B7-H7    | 117(2)     | B4-B7-B8      | 110.0(3)   |
| B4-B7-B10   | 59.6(3)    | H7-B7-B8      | 127(3)     |
| H7-B7-B10   | 129(2)     | B8-B7-B10     | 60.1(2)    |
| B2-B8-B5    | 59.5(3)    | B2-B8-B7      | 59.0(2)    |
| B2-B8-H8    | 121(2)     | B2-B8-B9      | 109.1(3)   |
| B2-B8-B10   | 108.6(3)   | B5-B8-B7      | 103.3(3)   |
| B5-B8-H8    | 121(3)     | B5-B8-B9      | 59.4(2)    |
| B5-B8-B10   | 105.8(3)   | B7-B8-H8      | 128(3)     |
| B7-B8-B9    | 106.0(3)   | B7-B8-B10     | 59.3(2)    |
| H8-B8-B9    | 119(3)     | H8-B8-B10     | 124(2)     |
| B9-B8-B10   | 60.0(3)    | B3-B9-B5      | 58.8(3)    |
| B3-B9-B6    | 58.1(3)    | B3-B9-B8      | 109.7(3)   |
| B3-B9-H9    | 125(3)     | B3-B9-B10     | 109.9(3)   |
| B5-B9-B6    | 101.0(3)   | B5-B9-B8      | 60.2(2)    |
| B5-B9-H9    | 129(3)     | B5-B9-B10     | 106.3(3)   |
| B6-B9-B8    | 105.4(3)   | B6-B9-H9      | 124(3)     |
| B6-B9-B10   | 60.3(3)    | B8-B9-H9      | 119(3)     |
| B8-B9-B10   | 59.8(3)    | H9-B9-B10     | 115(3)     |
| B4-B10-B6   | 58.0(3)    | B4-B10-B7     | 58.8(2)    |
| B4-B10-B8   | 109.8(3)   | B4-B10-B9     | 109.8(3)   |
| B4-B10-H10  | 121(2)     | B6-B10-B7     | 101.5(3)   |
| B6-B10-B8   | 105.7(3)   | B6-B10-B9     | 60.3(3)    |
| B6-B10-H10  | 122(3)     | B7-B10-B8     | 60.6(2)    |
| B7-B10-B9   | 107.2(3)   | B7-B10-H10    | 128(3)     |
| B8-B10-B9   | 60.2(2)    | B8-B10-H10    | 123(2)     |
| B9-B10-H10  | 118(3)     | Ru1-C1-O1     | 176.8(4)   |
| Pt1-P1-C11  | 115.78(13) | Pt1-P1-C17    | 117.71(15) |
| Pt1-P1-C18  | 112.15(14) | C11-P1-C17    | 102.85(19) |
| C11-P1-C18  | 105.0(2)   | C17-P1-C18    | 101.6(2)   |
| P1-C11-C12  | 122.9(3)   | P1-C11-C16    | 118.4(3)   |
| C12-C11-C16 | 118.7(4)   | C11-C12-H12   | 119.6      |
| C11-C12-C13 | 120.8(4)   | H12-C12-C13   | 119.6      |
| C12-C13-H13 | 120.1      | C12-C13-C14   | 119.9(4)   |
| H13-C13-C14 | 120.1      | C13-C14-H14   | 120.0      |
| C13-C14-C15 | 120.1(4)   | H14-C14-C15   | 120.0      |
| C14-C15-H15 | 119.7      | C14-C15-C16   | 120.6(4)   |
| H15-C15-C16 | 119.7      | C11-C16-C15   | 120.0(4)   |
| C11-C16-H16 | 120.0      | C15-C16-H16   | 120.0      |
| P1-C17-H17A | 109.5      | P1-C17-H17B   | 109.5      |
| P1-C17-H17C | 109.5      | H17A-C17-H17B | 109.5      |

|                |            |                |            |
|----------------|------------|----------------|------------|
| H17A-C17-H17C  | 109.5      | H17B-C17-H17C  | 109.5      |
| P1-C18-H18A    | 109.5      | P1-C18-H18B    | 109.5      |
| P1-C18-H18C    | 109.5      | H18A-C18-H18B  | 109.5      |
| H18A-C18-H18C  | 109.5      | H18B-C18-H18C  | 109.5      |
| Pt1-P2-C21     | 118.21(14) | Pt1-P2-C27     | 113.82(18) |
| Pt1-P2-C28     | 113.1(2)   | C21-P2-C27     | 101.6(2)   |
| C21-P2-C28     | 105.2(2)   | C27-P2-C28     | 103.2(3)   |
| P2-C21-C22     | 123.6(3)   | P2-C21-C26     | 117.7(3)   |
| C22-C21-C26    | 118.8(4)   | C21-C22-H22    | 119.8      |
| C21-C22-C23    | 120.4(4)   | H22-C22-C23    | 119.8      |
| C22-C23-H23    | 119.9      | C22-C23-C24    | 120.2(4)   |
| H23-C23-C24    | 119.9      | C23-C24-H24    | 120.0      |
| C23-C24-C25    | 120.0(4)   | H24-C24-C25    | 120.0      |
| C24-C25-H25    | 120.0      | C24-C25-C26    | 120.1(5)   |
| H25-C25-C26    | 120.0      | C21-C26-C25    | 120.4(4)   |
| C21-C26-H26    | 119.8      | C25-C26-H26    | 119.8      |
| P2-C27-H27A    | 109.5      | P2-C27-H27B    | 109.5      |
| P2-C27-H27C    | 109.5      | H27A-C27-H27B  | 109.5      |
| H27A-C27-H27C  | 109.5      | H27B-C27-H27C  | 109.5      |
| P2-C28-H28A    | 109.5      | P2-C28-H28B    | 109.5      |
| P2-C28-H28C    | 109.5      | H28A-C28-H28B  | 109.5      |
| H28A-C28-H28C  | 109.5      | H28B-C28-H28C  | 109.5      |
| Ru1-P3-C311    | 116.05(13) | Ru1-P3-C321    | 115.82(15) |
| Ru1-P3-C331    | 113.33(13) | C311-P3-C321   | 105.79(17) |
| C311-P3-C331   | 100.72(18) | C321-P3-C331   | 103.32(19) |
| P3-C311-C312   | 120.9(3)   | P3-C311-C316   | 120.2(3)   |
| C312-C311-C316 | 118.8(4)   | C311-C312-H312 | 119.7      |
| C311-C312-C313 | 120.6(4)   | H312-C312-C313 | 119.7      |
| C312-C313-H313 | 120.0      | C312-C313-C314 | 120.0(4)   |
| H313-C313-C314 | 120.0      | C313-C314-H314 | 120.0      |
| C313-C314-C315 | 120.0(4)   | H314-C314-C315 | 120.0      |
| C314-C315-H315 | 119.9      | C314-C315-C316 | 120.1(4)   |
| H315-C315-C316 | 119.9      | C311-C316-C315 | 120.5(4)   |
| C311-C316-H316 | 119.8      | C315-C316-H316 | 119.8      |
| P3-C321-C322   | 123.2(3)   | P3-C321-C326   | 118.1(3)   |
| C322-C321-C326 | 118.7(4)   | C321-C322-H322 | 119.6      |
| C321-C322-C323 | 120.8(4)   | H322-C322-C323 | 119.6      |
| C322-C323-H323 | 119.9      | C322-C323-C324 | 120.1(4)   |
| H323-C323-C324 | 119.9      | C323-C324-H324 | 120.3      |
| C323-C324-C325 | 119.3(4)   | H324-C324-C325 | 120.3      |
| C324-C325-H325 | 119.4      | C324-C325-C326 | 121.3(4)   |
| H325-C325-C326 | 119.4      | C321-C326-C325 | 119.8(4)   |
| C321-C326-H326 | 120.1      | C325-C326-H326 | 120.1      |
| P3-C331-C332   | 121.1(3)   | P3-C331-C336   | 119.8(3)   |
| C332-C331-C336 | 119.0(4)   | C331-C332-H332 | 119.9      |
| C331-C332-C333 | 120.2(4)   | H332-C332-C333 | 119.9      |
| C332-C333-H333 | 119.9      | C332-C333-C334 | 120.3(4)   |
| H333-C333-C334 | 119.9      | C333-C334-H334 | 120.1      |
| C333-C334-C335 | 119.9(4)   | H334-C334-C335 | 120.1      |
| C334-C335-H335 | 120.1      | C334-C335-C336 | 119.8(4)   |
| H335-C335-C336 | 120.1      | C331-C336-C335 | 120.9(4)   |
| C331-C336-H336 | 119.6      | C335-C336-H336 | 119.6      |

**Table S3** Bond lengths [Å] and angles [°] for [7,7-(PMe<sub>2</sub>Ph)<sub>2</sub>-9,9,9-(CO)(PPh<sub>3</sub>)<sub>2</sub>-*nido*-7,9-PtOsB<sub>9</sub>H<sub>11</sub>].CH<sub>2</sub>Cl<sub>2</sub> (**6**) with s.u.s. in parentheses.

|           |           |           |           |
|-----------|-----------|-----------|-----------|
| B1–H1     | 1.07(3)   | B1–B2     | 1.745(5)  |
| B1–B3     | 1.764(5)  | B1–B4     | 1.775(5)  |
| B1–B6     | 1.771(5)  | B1–B11    | 1.797(4)  |
| B2–H2     | 1.11(3)   | B2–B3     | 1.763(4)  |
| B2–B5     | 1.787(4)  | B2–B6     | 1.858(4)  |
| B2–Pt7    | 2.209(3)  | B3–H3     | 1.08(3)   |
| B3–B4     | 1.791(4)  | B3–B5     | 1.767(5)  |
| B3–B10    | 1.793(5)  | B4–H4     | 1.10(3)   |
| B4–Os9    | 2.266(3)  | B4–B10    | 1.803(5)  |
| B4–B11    | 1.816(4)  | B5–H5     | 1.08(3)   |
| B5–Pt7    | 2.287(3)  | B5–B10    | 1.845(4)  |
| B5–H510   | 1.27(3)   | B6–H6     | 1.10(3)   |
| B6–Pt7    | 2.230(3)  | B6–B8     | 1.755(4)  |
| B6–B11    | 1.782(4)  | Pt7–B8    | 2.392(3)  |
| Pt7–P1    | 2.3367(7) | Pt7–P2    | 2.3328(7) |
| B8–H8     | 1.06(3)   | B8–Os9    | 2.379(3)  |
| B8–B11    | 1.817(4)  | B8–H89    | 1.31(3)   |
| Os9–B10   | 2.356(3)  | Os9–B11   | 2.314(3)  |
| Os9–H89   | 1.81(4)   | Os9–C9    | 1.860(3)  |
| Os9–P3    | 2.3663(7) | Os9–P4    | 2.4115(6) |
| B10–H10   | 1.08(3)   | B10–H510  | 1.28(3)   |
| B11–H11   | 1.12(3)   | C9–O9     | 1.158(4)  |
| P1–C11    | 1.821(3)  | P1–C17    | 1.813(3)  |
| P1–C18    | 1.811(3)  | C11–C12   | 1.395(4)  |
| C11–C16   | 1.391(4)  | C12–H12   | 0.950     |
| C12–C13   | 1.381(4)  | C13–H13   | 0.950     |
| C13–C14   | 1.378(5)  | C14–H14   | 0.950     |
| C14–C15   | 1.379(5)  | C15–H15   | 0.950     |
| C15–C16   | 1.390(4)  | C16–H16   | 0.950     |
| C17–H17A  | 0.980     | C17–H17B  | 0.980     |
| C17–H17C  | 0.980     | C18–H18A  | 0.980     |
| C18–H18B  | 0.980     | C18–H18C  | 0.980     |
| P2–C21    | 1.793(11) | P2–C21'   | 1.830(7)  |
| P2–C27    | 1.815(3)  | P2–C28    | 1.811(3)  |
| C21–C22   | 1.398(12) | C21–C26   | 1.389(12) |
| C22–H22   | 0.950     | C22–C23   | 1.395(11) |
| C23–H23   | 0.950     | C23–C24   | 1.401(13) |
| C24–H24   | 0.950     | C24–C25   | 1.371(13) |
| C25–H25   | 0.950     | C25–C26   | 1.392(12) |
| C26–H26   | 0.950     | C21'–C22' | 1.392(8)  |
| C21'–C26' | 1.415(9)  | C22'–H22' | 0.950     |
| C22'–C23' | 1.387(9)  | C23'–H23' | 0.950     |
| C23'–C24' | 1.390(10) | C24'–H24' | 0.950     |
| C24'–C25' | 1.401(9)  | C25'–H25' | 0.950     |
| C25'–C26' | 1.400(8)  | C26'–H26' | 0.950     |
| C27–H27A  | 0.980     | C27–H27B  | 0.980     |
| C27–H27C  | 0.980     | C28–H28A  | 0.980     |
| C28–H28B  | 0.980     | C28–H28C  | 0.980     |
| P3–C311   | 1.847(3)  | P3–C321   | 1.843(3)  |
| P3–C331   | 1.840(3)  | C311–C312 | 1.397(4)  |
| C311–C316 | 1.396(4)  | C312–H312 | 0.950     |
| C312–C313 | 1.393(4)  | C313–H313 | 0.950     |

|           |            |           |            |
|-----------|------------|-----------|------------|
| C313–C314 | 1.375(5)   | C314–H314 | 0.950      |
| C314–C315 | 1.381(5)   | C315–H315 | 0.950      |
| C315–C316 | 1.391(4)   | C316–H316 | 0.950      |
| C321–C322 | 1.389(5)   | C321–C326 | 1.393(5)   |
| C322–H322 | 0.950      | C322–C323 | 1.393(4)   |
| C323–H323 | 0.950      | C323–C324 | 1.370(6)   |
| C324–H324 | 0.950      | C324–C325 | 1.382(6)   |
| C325–H325 | 0.950      | C325–C326 | 1.390(5)   |
| C326–H326 | 0.950      | C331–C332 | 1.400(4)   |
| C331–C336 | 1.389(4)   | C332–H332 | 0.950      |
| C332–C333 | 1.377(4)   | C333–H333 | 0.950      |
| C333–C334 | 1.387(5)   | C334–H334 | 0.950      |
| C334–C335 | 1.376(5)   | C335–H335 | 0.950      |
| C335–C336 | 1.390(5)   | C336–H336 | 0.950      |
| P4–C411   | 1.857(3)   | P4–C421   | 1.847(3)   |
| P4–C431   | 1.840(3)   | C411–C412 | 1.390(4)   |
| C411–C416 | 1.393(4)   | C412–H412 | 0.950      |
| C412–C413 | 1.386(4)   | C413–H413 | 0.950      |
| C413–C414 | 1.379(4)   | C414–H414 | 0.950      |
| C414–C415 | 1.383(5)   | C415–H415 | 0.950      |
| C415–C416 | 1.385(4)   | C416–H416 | 0.950      |
| C421–C422 | 1.384(4)   | C421–C426 | 1.399(4)   |
| C422–H422 | 0.950      | C422–C423 | 1.397(4)   |
| C423–H423 | 0.950      | C423–C424 | 1.378(5)   |
| C424–H424 | 0.950      | C424–C425 | 1.381(5)   |
| C425–H425 | 0.950      | C425–C426 | 1.388(4)   |
| C426–H426 | 0.950      | C431–C432 | 1.401(4)   |
| C431–C436 | 1.388(4)   | C432–H432 | 0.950      |
| C432–C433 | 1.380(4)   | C433–H433 | 0.950      |
| C433–C434 | 1.381(4)   | C434–H434 | 0.950      |
| C434–C435 | 1.381(4)   | C435–H435 | 0.950      |
| C435–C436 | 1.385(4)   | C436–H436 | 0.950      |
| C11–C1    | 1.789(13)  | C1–H1A    | 0.990      |
| C1–H1B    | 0.990      | C1–C2     | 1.479(17)  |
| C2–H2A    | 0.990      | C2–H2B    | 0.990      |
| C2–C12    | 1.713(12)  | C13–C3    | 1.806(15)  |
| C3–H3A    | 0.990      | C3–H3B    | 0.990      |
| C3–C4     | 1.496(17)  | C4–H4A    | 0.990      |
| C4–H4B    | 0.990      | C4–C14    | 1.726(15)  |
|           |            |           |            |
| H1–B1–B2  | 119.0(17)  | H1–B1–B3  | 117.5(16)  |
| H1–B1–B4  | 120.7(17)  | H1–B1–B6  | 122.5(16)  |
| H1–B1–B11 | 120.3(17)  | B2–B1–B3  | 60.34(18)  |
| B2–B1–B4  | 109.3(2)   | B2–B1–B6  | 63.80(18)  |
| B2–B1–B11 | 113.1(2)   | B3–B1–B4  | 60.80(19)  |
| B3–B1–B6  | 111.5(2)   | B3–B1–B11 | 112.3(2)   |
| B4–B1–B6  | 108.1(2)   | B4–B1–B11 | 61.12(18)  |
| B6–B1–B11 | 59.93(18)  | B1–B2–H2  | 120.5(16)  |
| B1–B2–B3  | 60.36(19)  | B1–B2–B5  | 109.3(2)   |
| B1–B2–B6  | 58.80(18)  | B1–B2–Pt7 | 119.43(19) |
| H2–B2–B3  | 122.2(16)  | H2–B2–B5  | 121.3(16)  |
| H2–B2–B6  | 120.4(16)  | H2–B2–Pt7 | 107.1(16)  |
| B3–B2–B5  | 59.69(18)  | B3–B2–B6  | 107.6(2)   |
| B3–B2–Pt7 | 121.44(19) | B5–B2–B6  | 110.7(2)   |
| B5–B2–Pt7 | 68.90(14)  | B6–B2–Pt7 | 65.86(13)  |

|             |            |             |            |
|-------------|------------|-------------|------------|
| B1-B3-B2    | 59.29(18)  | B1-B3-H3    | 124.1(17)  |
| B1-B3-B4    | 59.91(18)  | B1-B3-B5    | 109.3(2)   |
| B1-B3-B10   | 109.1(2)   | B2-B3-H3    | 122.8(17)  |
| B2-B3-B4    | 107.8(2)   | B2-B3-B5    | 60.83(18)  |
| B2-B3-B10   | 110.1(2)   | H3-B3-B4    | 121.8(18)  |
| H3-B3-B5    | 118.0(18)  | H3-B3-B10   | 117.9(17)  |
| B4-B3-B5    | 110.4(2)   | B4-B3-B10   | 60.41(18)  |
| B5-B3-B10   | 62.43(18)  | B1-B4-B3    | 59.29(18)  |
| B1-B4-H4    | 118.3(17)  | B1-B4-Os9   | 121.51(19) |
| B1-B4-B10   | 108.2(2)   | B1-B4-B11   | 60.03(18)  |
| B3-B4-H4    | 112.5(17)  | B3-B4-Os9   | 123.4(2)   |
| B3-B4-B10   | 59.87(18)  | B3-B4-B11   | 110.1(2)   |
| H4-B4-Os9   | 112.2(17)  | H4-B4-B10   | 117.3(17)  |
| H4-B4-B11   | 124.7(17)  | Os9-B4-B10  | 69.70(14)  |
| Os9-B4-B11  | 68.03(14)  | B10-B4-B11  | 113.9(2)   |
| B2-B5-B3    | 59.48(18)  | B2-B5-H5    | 128.2(17)  |
| B2-B5-Pt7   | 64.28(13)  | B2-B5-B10   | 106.8(2)   |
| B2-B5-H510  | 123.3(13)  | B3-B5-H5    | 121.6(17)  |
| B3-B5-Pt7   | 117.21(19) | B3-B5-B10   | 59.48(18)  |
| B3-B5-H510  | 100.8(14)  | H5-B5-Pt7   | 113.9(17)  |
| H5-B5-B10   | 116.2(17)  | H5-B5-H510  | 108(2)     |
| Pt7-B5-B10  | 117.80(17) | Pt7-B5-H510 | 87.6(13)   |
| B10-B5-H510 | 43.8(14)   | B1-B6-B2    | 57.40(17)  |
| B1-B6-H6    | 121.8(16)  | B1-B6-Pt7   | 117.08(19) |
| B1-B6-B8    | 112.9(2)   | B1-B6-B11   | 60.74(18)  |
| B2-B6-H6    | 119.8(16)  | B2-B6-Pt7   | 64.65(13)  |
| B2-B6-B8    | 116.4(2)   | B2-B6-B11   | 108.5(2)   |
| H6-B6-Pt7   | 106.3(16)  | H6-B6-B8    | 115.9(16)  |
| H6-B6-B11   | 121.2(16)  | Pt7-B6-B8   | 72.67(14)  |
| Pt7-B6-B11  | 124.27(18) | B8-B6-B11   | 61.80(17)  |
| B2-Pt7-B5   | 46.81(11)  | B2-Pt7-B6   | 49.50(11)  |
| B2-Pt7-B8   | 83.68(11)  | B2-Pt7-P1   | 149.12(8)  |
| B2-Pt7-P2   | 97.96(8)   | B5-Pt7-B6   | 83.23(12)  |
| B5-Pt7-B8   | 88.78(11)  | B5-Pt7-P1   | 160.92(8)  |
| B5-Pt7-P2   | 87.37(8)   | B6-Pt7-B8   | 44.47(10)  |
| B6-Pt7-P1   | 104.20(8)  | B6-Pt7-P2   | 140.65(8)  |
| B8-Pt7-P1   | 84.78(7)   | B8-Pt7-P2   | 172.89(7)  |
| P1-Pt7-P2   | 97.01(3)   | B6-B8-Pt7   | 62.86(13)  |
| B6-B8-H8    | 116.8(17)  | B6-B8-Os9   | 116.29(18) |
| B6-B8-B11   | 59.82(17)  | B6-B8-H89   | 134.3(15)  |
| Pt7-B8-H8   | 107.9(18)  | Pt7-B8-Os9  | 120.44(12) |
| Pt7-B8-B11  | 114.47(17) | Pt7-B8-H89  | 87.6(16)   |
| H8-B8-Os9   | 119.6(17)  | H8-B8-B11   | 124.2(18)  |
| H8-B8-H89   | 105(2)     | Os9-B8-B11  | 65.33(13)  |
| Os9-B8-H89  | 48.8(16)   | B11-B8-H89  | 111.4(16)  |
| B4-Os9-B8   | 80.74(11)  | B4-Os9-B10  | 45.88(12)  |
| B4-Os9-B11  | 46.71(11)  | B4-Os9-H89  | 99.5(11)   |
| B4-Os9-C9   | 77.25(12)  | B4-Os9-P3   | 123.15(9)  |
| B4-Os9-P4   | 133.23(9)  | B8-Os9-B10  | 85.80(10)  |
| B8-Os9-B11  | 45.53(11)  | B8-Os9-H89  | 33.0(11)   |
| B8-Os9-C9   | 145.99(12) | B8-Os9-P3   | 123.71(8)  |
| B8-Os9-P4   | 83.98(7)   | B10-Os9-B11 | 81.00(11)  |
| B10-Os9-H89 | 80.0(11)   | B10-Os9-C9  | 96.87(11)  |
| B10-Os9-P3  | 82.35(8)   | B10-Os9-P4  | 169.65(8)  |
| B11-Os9-H89 | 77.0(11)   | B11-Os9-C9  | 101.21(12) |

|                |            |                |            |
|----------------|------------|----------------|------------|
| B11-Os9-P3     | 160.83(8)  | B11-Os9-P4     | 92.91(8)   |
| H89-Os9-C9     | 176.6(11)  | H89-Os9-P3     | 90.8(11)   |
| H89-Os9-P4     | 90.5(11)   | C9-Os9-P3      | 90.16(9)   |
| C9-Os9-P4      | 92.50(8)   | P3-Os9-P4      | 102.06(2)  |
| B3-B10-B4      | 59.72(18)  | B3-B10-B5      | 58.09(17)  |
| B3-B10-Os9     | 118.61(19) | B3-B10-H10     | 113.5(17)  |
| B3-B10-H510    | 98.9(13)   | B4-B10-B5      | 106.4(2)   |
| B4-B10-Os9     | 64.43(13)  | B4-B10-H10     | 129.7(18)  |
| B4-B10-H510    | 123.6(13)  | B5-B10-Os9     | 121.45(17) |
| B5-B10-H10     | 108.5(17)  | B5-B10-H510    | 43.2(13)   |
| Os9-B10-H10    | 120.9(17)  | Os9-B10-H510   | 91.3(13)   |
| H10-B10-H510   | 107(2)     | B1-B11-B4      | 58.85(18)  |
| B1-B11-B6      | 59.33(18)  | B1-B11-B8      | 108.8(2)   |
| B1-B11-Os9     | 118.02(19) | B1-B11-H11     | 115.4(16)  |
| B4-B11-B6      | 105.9(2)   | B4-B11-B8      | 111.9(2)   |
| B4-B11-Os9     | 65.26(14)  | B4-B11-H11     | 123.9(17)  |
| B6-B11-B8      | 58.37(17)  | B6-B11-Os9     | 118.32(18) |
| B6-B11-H11     | 116.9(17)  | B8-B11-Os9     | 69.14(13)  |
| B8-B11-H11     | 120.8(17)  | Os9-B11-H11    | 116.6(16)  |
| Os9-C9-O9      | 176.9(3)   | Pt7-P1-C11     | 113.93(9)  |
| Pt7-P1-C17     | 119.96(10) | Pt7-P1-C18     | 113.21(10) |
| C11-P1-C17     | 100.78(14) | C11-P1-C18     | 106.53(14) |
| C17-P1-C18     | 100.62(16) | P1-C11-C12     | 117.5(2)   |
| P1-C11-C16     | 124.1(2)   | C12-C11-C16    | 118.4(3)   |
| C11-C12-H12    | 119.3      | C11-C12-C13    | 121.3(3)   |
| H12-C12-C13    | 119.3      | C12-C13-H13    | 120.1      |
| C12-C13-C14    | 119.8(3)   | H13-C13-C14    | 120.1      |
| C13-C14-H14    | 120.1      | C13-C14-C15    | 119.8(3)   |
| H14-C14-C15    | 120.1      | C14-C15-H15    | 119.6      |
| C14-C15-C16    | 120.7(3)   | H15-C15-C16    | 119.6      |
| C11-C16-C15    | 120.0(3)   | C11-C16-H16    | 120.0      |
| C15-C16-H16    | 120.0      | P1-C17-H17A    | 109.5      |
| P1-C17-H17B    | 109.5      | P1-C17-H17C    | 109.5      |
| H17A-C17-H17B  | 109.5      | H17A-C17-H17C  | 109.5      |
| H17B-C17-H17C  | 109.5      | P1-C18-H18A    | 109.5      |
| P1-C18-H18B    | 109.5      | P1-C18-H18C    | 109.5      |
| H18A-C18-H18B  | 109.5      | H18A-C18-H18C  | 109.5      |
| H18B-C18-H18C  | 109.5      | Pt7-P2-C21     | 113.3(10)  |
| Pt7-P2-C21'    | 107.4(6)   | Pt7-P2-C27     | 117.60(12) |
| Pt7-P2-C28     | 119.88(12) | C21-P2-C27     | 99.3(15)   |
| C21-P2-C28     | 102.2(6)   | C21'-P2-C27    | 99.8(9)    |
| C21'-P2-C28    | 108.7(4)   | C27-P2-C28     | 101.45(18) |
| P2-C21-C22     | 116.6(10)  | P2-C21-C26     | 121.1(10)  |
| C22-C21-C26    | 122.1(10)  | C21-C22-H22    | 121.2      |
| C21-C22-C23    | 117.5(11)  | H22-C22-C23    | 121.2      |
| C22-C23-H23    | 120.1      | C22-C23-C24    | 119.8(11)  |
| H23-C23-C24    | 120.1      | C23-C24-H24    | 118.9      |
| C23-C24-C25    | 122.3(11)  | H24-C24-C25    | 118.9      |
| C24-C25-H25    | 120.8      | C24-C25-C26    | 118.3(11)  |
| H25-C25-C26    | 120.8      | C21-C26-C25    | 119.9(11)  |
| C21-C26-H26    | 120.1      | C25-C26-H26    | 120.1      |
| P2-C21'-C22'   | 126.8(7)   | P2-C21'-C26'   | 114.5(6)   |
| C22'-C21'-C26' | 118.6(6)   | C21'-C22'-H22' | 118.9      |
| C21'-C22'-C23' | 122.3(8)   | H22'-C22'-C23' | 118.9      |
| C22'-C23'-H23' | 120.9      | C22'-C23'-C24' | 118.2(8)   |

|                |            |                |            |
|----------------|------------|----------------|------------|
| H23'-C23'-C24' | 120.9      | C23'-C24'-H24' | 119.1      |
| C23'-C24'-C25' | 121.9(7)   | H24'-C24'-C25' | 119.1      |
| C24'-C25'-H25' | 120.6      | C24'-C25'-C26' | 118.9(7)   |
| H25'-C25'-C26' | 120.6      | C21'-C26'-C25' | 120.1(7)   |
| C21'-C26'-H26' | 119.9      | C25'-C26'-H26' | 119.9      |
| P2-C27-H27A    | 109.5      | P2-C27-H27B    | 109.5      |
| P2-C27-H27C    | 109.5      | H27A-C27-H27B  | 109.5      |
| H27A-C27-H27C  | 109.5      | H27B-C27-H27C  | 109.5      |
| P2-C28-H28A    | 109.5      | P2-C28-H28B    | 109.5      |
| P2-C28-H28C    | 109.5      | H28A-C28-H28B  | 109.5      |
| H28A-C28-H28C  | 109.5      | H28B-C28-H28C  | 109.5      |
| Os9-P3-C311    | 117.51(10) | Os9-P3-C321    | 120.73(9)  |
| Os9-P3-C331    | 112.59(9)  | C311-P3-C321   | 99.44(13)  |
| C311-P3-C331   | 102.66(13) | C321-P3-C331   | 101.13(13) |
| P3-C311-C312   | 119.8(2)   | P3-C311-C316   | 121.6(2)   |
| C312-C311-C316 | 118.4(3)   | C311-C312-H312 | 119.7      |
| C311-C312-C313 | 120.6(3)   | H312-C312-C313 | 119.7      |
| C312-C313-H313 | 119.9      | C312-C313-C314 | 120.2(3)   |
| H313-C313-C314 | 119.9      | C313-C314-H314 | 120.0      |
| C313-C314-C315 | 119.9(3)   | H314-C314-C315 | 120.0      |
| C314-C315-H315 | 119.8      | C314-C315-C316 | 120.4(3)   |
| H315-C315-C316 | 119.8      | C311-C316-C315 | 120.4(3)   |
| C311-C316-H316 | 119.8      | C315-C316-H316 | 119.8      |
| P3-C321-C322   | 123.4(2)   | P3-C321-C326   | 118.4(2)   |
| C322-C321-C326 | 118.2(3)   | C321-C322-H322 | 119.4      |
| C321-C322-C323 | 121.3(3)   | H322-C322-C323 | 119.4      |
| C322-C323-H323 | 120.2      | C322-C323-C324 | 119.7(3)   |
| H323-C323-C324 | 120.2      | C323-C324-H324 | 120.0      |
| C323-C324-C325 | 120.1(3)   | H324-C324-C325 | 120.0      |
| C324-C325-H325 | 119.8      | C324-C325-C326 | 120.4(3)   |
| H325-C325-C326 | 119.8      | C321-C326-C325 | 120.3(3)   |
| C321-C326-H326 | 119.9      | C325-C326-H326 | 119.9      |
| P3-C331-C332   | 119.6(2)   | P3-C331-C336   | 122.4(2)   |
| C332-C331-C336 | 118.0(3)   | C331-C332-H332 | 119.4      |
| C331-C332-C333 | 121.2(3)   | H332-C332-C333 | 119.4      |
| C332-C333-H333 | 120.1      | C332-C333-C334 | 119.9(3)   |
| H333-C333-C334 | 120.1      | C333-C334-H334 | 120.1      |
| C333-C334-C335 | 119.8(3)   | H334-C334-C335 | 120.1      |
| C334-C335-H335 | 119.9      | C334-C335-C336 | 120.3(3)   |
| H335-C335-C336 | 119.9      | C331-C336-C335 | 120.8(3)   |
| C331-C336-H336 | 119.6      | C335-C336-H336 | 119.6      |
| Os9-P4-C411    | 119.53(9)  | Os9-P4-C421    | 114.08(8)  |
| Os9-P4-C431    | 117.96(9)  | C411-P4-C421   | 99.10(12)  |
| C411-P4-C431   | 100.82(12) | C421-P4-C431   | 102.30(12) |
| P4-C411-C412   | 120.6(2)   | P4-C411-C416   | 122.1(2)   |
| C412-C411-C416 | 117.3(3)   | C411-C412-H412 | 119.3      |
| C411-C412-C413 | 121.4(3)   | H412-C412-C413 | 119.3      |
| C412-C413-H413 | 119.7      | C412-C413-C414 | 120.6(3)   |
| H413-C413-C414 | 119.7      | C413-C414-H414 | 120.5      |
| C413-C414-C415 | 119.0(3)   | H414-C414-C415 | 120.5      |
| C414-C415-H415 | 119.8      | C414-C415-C416 | 120.4(3)   |
| H415-C415-C416 | 119.8      | C411-C416-C415 | 121.4(3)   |
| C411-C416-H416 | 119.3      | C415-C416-H416 | 119.3      |
| P4-C421-C422   | 120.8(2)   | P4-C421-C426   | 120.7(2)   |
| C422-C421-C426 | 118.5(3)   | C421-C422-H422 | 119.6      |

|                |           |                |          |
|----------------|-----------|----------------|----------|
| C421–C422–C423 | 120.7(3)  | H422–C422–C423 | 119.6    |
| C422–C423–H423 | 120.0     | C422–C423–C424 | 120.1(3) |
| H423–C423–C424 | 120.0     | C423–C424–H424 | 120.0    |
| C423–C424–C425 | 120.0(3)  | H424–C424–C425 | 120.0    |
| C424–C425–H425 | 120.0     | C424–C425–C426 | 120.0(3) |
| H425–C425–C426 | 120.0     | C421–C426–C425 | 120.8(3) |
| C421–C426–H426 | 119.6     | C425–C426–H426 | 119.6    |
| P4–C431–C432   | 123.7(2)  | P4–C431–C436   | 118.3(2) |
| C432–C431–C436 | 117.7(3)  | C431–C432–H432 | 119.7    |
| C431–C432–C433 | 120.7(3)  | H432–C432–C433 | 119.7    |
| C432–C433–H433 | 119.6     | C432–C433–C434 | 120.7(3) |
| H433–C433–C434 | 119.6     | C433–C434–H434 | 120.3    |
| C433–C434–C435 | 119.4(3)  | H434–C434–C435 | 120.3    |
| C434–C435–H435 | 120.0     | C434–C435–C436 | 120.0(3) |
| H435–C435–C436 | 120.0     | C431–C436–C435 | 121.5(3) |
| C431–C436–H436 | 119.2     | C435–C436–H436 | 119.2    |
| Cl1–C1–H1A     | 109.5     | Cl1–C1–H1B     | 109.5    |
| Cl1–C1–C2      | 110.8(13) | H1A–C1–H1B     | 108.1    |
| H1A–C1–C2      | 109.5     | H1B–C1–C2      | 109.5    |
| C1–C2–H2A      | 108.6     | C1–C2–H2B      | 108.6    |
| C1–C2–Cl2      | 114.5(13) | H2A–C2–H2B     | 107.6    |
| H2A–C2–Cl2     | 108.6     | H2B–C2–Cl2     | 108.6    |
| Cl3–C3–H3A     | 109.1     | Cl3–C3–H3B     | 109.1    |
| Cl3–C3–C4      | 112.4(13) | H3A–C3–H3B     | 107.9    |
| H3A–C3–C4      | 109.1     | H3B–C3–C4      | 109.1    |
| C3–C4–H4A      | 110.1     | C3–C4–H4B      | 110.1    |
| C3–C4–Cl4      | 107.9(12) | H4A–C4–H4B     | 108.4    |
| H4A–C4–Cl4     | 110.1     | H4B–C4–Cl4     | 110.1    |

**Table S4** Bond lengths [Å] and angles [°] for [5,5,5-(PPh<sub>3</sub>)<sub>2</sub>(CO)-*nido*-5-OsB<sub>9</sub>H<sub>13</sub>] (**7**) with s.u.s. in parentheses.

|          |           |           |           |
|----------|-----------|-----------|-----------|
| Os5–B1   | 2.294(4)  | Os5–B2    | 2.334(4)  |
| Os5–B6   | 2.247(4)  | Os5–B10   | 2.385(4)  |
| Os5–H56  | 1.59(5)   | Os5–C1    | 1.878(4)  |
| Os5–P1   | 2.3862(8) | Os5–P2    | 2.4043(9) |
| B1–H1    | 1.07(4)   | B1–B2     | 1.814(6)  |
| B1–B3    | 1.781(7)  | B1–B4     | 1.817(6)  |
| B1–B10   | 1.763(6)  | B2–H2     | 1.06(4)   |
| B2–B3    | 1.788(6)  | B2–B6     | 1.746(6)  |
| B2–B7    | 1.795(7)  | B3–H3     | 1.12(5)   |
| B3–B4    | 1.770(7)  | B3–B7     | 1.753(7)  |
| B3–B8    | 1.742(7)  | B4–H4     | 1.26(4)   |
| B4–B8    | 1.781(7)  | B4–B9     | 1.708(7)  |
| B4–B10   | 1.796(6)  | B6–H6     | 1.09(4)   |
| B6–B7    | 1.784(6)  | B6–H56    | 1.47(5)   |
| B6–H67   | 1.40(5)   | B7–H7     | 1.08(5)   |
| B7–B8    | 1.964(7)  | B7–H67    | 1.19(5)   |
| B8–H8    | 1.11(5)   | B8–B9     | 1.787(7)  |
| B8–H89   | 1.29(5)   | B9–H9     | 1.12(5)   |
| B9–B10   | 1.821(6)  | B9–H89    | 1.26(5)   |
| B9–H910  | 1.37(5)   | B10–H10   | 1.06(4)   |
| B10–H910 | 1.24(4)   | C1–O1     | 1.152(4)  |
| P1–C111  | 1.837(4)  | P1–C121   | 1.838(3)  |
| P1–C131  | 1.839(4)  | C111–C112 | 1.388(5)  |



|             |            |            |            |
|-------------|------------|------------|------------|
| C111–C116   | 1.397(5)   | C112–H112  | 0.950      |
| C112–C113   | 1.389(6)   | C113–H113  | 0.950      |
| C113–C114   | 1.379(6)   | C114–H114  | 0.950      |
| C114–C115   | 1.386(6)   | C115–H115  | 0.950      |
| C115–C116   | 1.380(6)   | C116–H116  | 0.950      |
| C121–C122   | 1.391(5)   | C121–C126  | 1.394(5)   |
| C122–H122   | 0.950      | C122–C123  | 1.388(5)   |
| C123–H123   | 0.950      | C123–C124  | 1.388(6)   |
| C124–H124   | 0.950      | C124–C125  | 1.378(6)   |
| C125–H125   | 0.950      | C125–C126  | 1.390(5)   |
| C126–H126   | 0.950      | C131–C132  | 1.396(5)   |
| C131–C136   | 1.386(5)   | C132–H132  | 0.950      |
| C132–C133   | 1.383(5)   | C133–H133  | 0.950      |
| C133–C134   | 1.382(6)   | C134–H134  | 0.950      |
| C134–C135   | 1.385(6)   | C135–H135  | 0.950      |
| C135–C136   | 1.389(6)   | C136–H136  | 0.950      |
| P2–C211     | 1.842(4)   | P2–C221    | 1.851(4)   |
| P2–C231     | 1.851(3)   | C211–C212  | 1.385(5)   |
| C211–C216   | 1.397(5)   | C212–H212  | 0.950      |
| C212–C213   | 1.388(5)   | C213–H213  | 0.950      |
| C213–C214   | 1.376(6)   | C214–H214  | 0.950      |
| C214–C215   | 1.385(6)   | C215–H215  | 0.950      |
| C215–C216   | 1.388(6)   | C216–H216  | 0.950      |
| C221–C222   | 1.397(6)   | C221–C226  | 1.387(5)   |
| C222–H222   | 0.950      | C222–C223  | 1.381(6)   |
| C223–H223   | 0.950      | C223–C224  | 1.377(7)   |
| C224–H224   | 0.950      | C224–C225  | 1.375(7)   |
| C225–H225   | 0.950      | C225–C226  | 1.395(6)   |
| C226–H226   | 0.950      | C231–C232  | 1.395(5)   |
| C231–C236   | 1.399(5)   | C232–H232  | 0.950      |
| C232–C233   | 1.385(5)   | C233–H233  | 0.950      |
| C233–C234   | 1.372(7)   | C234–H234  | 0.950      |
| C234–C235   | 1.381(7)   | C235–H235  | 0.950      |
| C235–C236   | 1.393(6)   | C236–H236  | 0.950      |
| C2–H2A      | 1.000      | C2–C11     | 1.697(14)  |
| C2–C12      | 1.728(14)  | C2–C13     | 1.671(14)  |
| C2'–H2'     | 1.000      | C2'–C11'   | 1.750(15)  |
| C2'–C12'    | 1.704(15)  | C2'–C13'   | 1.723(15)  |
| C2''–H2''   | 1.000      | C2''–C11'' | 1.718(16)  |
| C2''–C12''  | 1.721(16)  | C2''–C13'' | 1.707(16)  |
|             |            |            |            |
| B1–Os5–B2   | 46.15(16)  | B1–Os5–B6  | 82.65(16)  |
| B1–Os5–B10  | 44.22(15)  | B1–Os5–H56 | 103.8(17)  |
| B1–Os5–C1   | 76.10(15)  | B1–Os5–P1  | 141.51(12) |
| B1–Os5–P2   | 121.71(12) | B2–Os5–B6  | 44.75(16)  |
| B2–Os5–B10  | 81.42(15)  | B2–Os5–H56 | 82.3(17)   |
| B2–Os5–C1   | 93.88(16)  | B2–Os5–P1  | 102.02(11) |
| B2–Os5–P2   | 158.93(12) | B6–Os5–B10 | 94.34(15)  |
| B6–Os5–H56  | 40.7(17)   | B6–Os5–C1  | 134.25(16) |
| B6–Os5–P1   | 84.53(11)  | B6–Os5–P2  | 126.24(11) |
| B10–Os5–H56 | 85.8(17)   | B10–Os5–C1 | 97.67(15)  |
| B10–Os5–P1  | 173.55(11) | B10–Os5–P2 | 80.58(11)  |
| H56–Os5–C1  | 174.4(17)  | H56–Os5–P1 | 89.2(17)   |
| H56–Os5–P2  | 85.5(17)   | C1–Os5–P1  | 87.59(11)  |
| C1–Os5–P2   | 99.29(11)  | P1–Os5–P2  | 94.94(3)   |

|            |           |            |           |
|------------|-----------|------------|-----------|
| Os5-B1-H1  | 114(2)    | Os5-B1-B2  | 68.09(19) |
| Os5-B1-B3  | 117.9(3)  | Os5-B1-B4  | 123.5(3)  |
| Os5-B1-B10 | 70.65(19) | H1-B1-B2   | 121(2)    |
| H1-B1-B3   | 121(2)    | H1-B1-B4   | 112(2)    |
| H1-B1-B10  | 116(2)    | B2-B1-B3   | 59.6(3)   |
| B2-B1-B4   | 112.7(3)  | B2-B1-B10  | 118.7(3)  |
| B3-B1-B4   | 58.9(3)   | B3-B1-B10  | 107.2(3)  |
| B4-B1-B10  | 60.2(2)   | Os5-B2-B1  | 65.76(19) |
| Os5-B2-H2  | 118(2)    | Os5-B2-B3  | 115.7(3)  |
| Os5-B2-B6  | 65.00(19) | Os5-B2-B7  | 113.1(3)  |
| B1-B2-H2   | 120(2)    | B1-B2-B3   | 59.3(3)   |
| B1-B2-B6   | 114.8(3)  | B1-B2-B7   | 106.1(3)  |
| H2-B2-B3   | 117(2)    | H2-B2-B6   | 119(2)    |
| H2-B2-B7   | 121(2)    | B3-B2-B6   | 111.3(3)  |
| B3-B2-B7   | 58.6(3)   | B6-B2-B7   | 60.5(2)   |
| B1-B3-B2   | 61.1(3)   | B1-B3-H3   | 124(2)    |
| B1-B3-B4   | 61.6(3)   | B1-B3-B7   | 109.4(3)  |
| B1-B3-B8   | 109.0(3)  | B2-B3-H3   | 115(2)    |
| B2-B3-B4   | 116.3(3)  | B2-B3-B7   | 60.9(3)   |
| B2-B3-B8   | 117.4(3)  | H3-B3-B4   | 118(2)    |
| H3-B3-B7   | 115(2)    | H3-B3-B8   | 118(2)    |
| B4-B3-B7   | 118.5(3)  | B4-B3-B8   | 60.9(3)   |
| B7-B3-B8   | 68.4(3)   | B1-B4-B3   | 59.5(3)   |
| B1-B4-H4   | 115(2)    | B1-B4-B8   | 105.7(3)  |
| B1-B4-B9   | 111.1(3)  | B1-B4-B10  | 58.4(2)   |
| B3-B4-H4   | 114(2)    | B3-B4-B8   | 58.7(3)   |
| B3-B4-B9   | 111.2(3)  | B3-B4-B10  | 106.3(3)  |
| H4-B4-B8   | 125(2)    | H4-B4-B9   | 127(2)    |
| H4-B4-B10  | 126(2)    | B8-B4-B9   | 61.6(3)   |
| B8-B4-B10  | 106.8(3)  | B9-B4-B10  | 62.6(3)   |
| Os5-B6-B2  | 70.3(2)   | Os5-B6-H6  | 127(2)    |
| Os5-B6-B7  | 117.7(3)  | Os5-B6-H56 | 45.0(18)  |
| Os5-B6-H67 | 122(2)    | B2-B6-H6   | 129(2)    |
| B2-B6-B7   | 61.1(3)   | B2-B6-H56  | 110.3(18) |
| B2-B6-H67  | 99(2)     | H6-B6-B7   | 114(2)    |
| H6-B6-H56  | 111(3)    | H6-B6-H67  | 104(3)    |
| B7-B6-H56  | 124.1(18) | B7-B6-H67  | 42(2)     |
| H56-B6-H67 | 96(3)     | B2-B7-B3   | 60.5(3)   |
| B2-B7-B6   | 58.4(2)   | B2-B7-H7   | 126(2)    |
| B2-B7-B8   | 106.6(3)  | B2-B7-H67  | 105(2)    |
| B3-B7-B6   | 111.2(3)  | B3-B7-H7   | 122(2)    |
| B3-B7-B8   | 55.5(3)   | B3-B7-H67  | 127(2)    |
| B6-B7-H7   | 118(2)    | B6-B7-B8   | 119.3(3)  |
| B6-B7-H67  | 51(2)     | H7-B7-B8   | 116(2)    |
| H7-B7-H67  | 108(3)    | B8-B7-H67  | 88(2)     |
| B3-B8-B4   | 60.3(3)   | B3-B8-B7   | 56.1(3)   |
| B3-B8-H8   | 122(2)    | B3-B8-B9   | 108.8(3)  |
| B3-B8-H89  | 129(2)    | B4-B8-B7   | 107.8(3)  |
| B4-B8-H8   | 126(2)    | B4-B8-B9   | 57.2(3)   |
| B4-B8-H89  | 100(2)    | B7-B8-H8   | 115(2)    |
| B7-B8-B9   | 118.5(3)  | B7-B8-H89  | 95(2)     |
| H8-B8-B9   | 121(2)    | H8-B8-H89  | 109(3)    |
| B9-B8-H89  | 45(2)     | B4-B9-B8   | 61.2(3)   |
| B4-B9-H9   | 127(2)    | B4-B9-B10  | 61.1(3)   |
| B4-B9-H89  | 105(2)    | B4-B9-H910 | 100.9(19) |

|                |            |                |            |
|----------------|------------|----------------|------------|
| B8-B9-H9       | 126(2)     | B8-B9-B10      | 105.4(3)   |
| B8-B9-H89      | 46(2)      | B8-B9-H910     | 116(2)     |
| H9-B9-B10      | 125(2)     | H9-B9-H89      | 110(3)     |
| H9-B9-H910     | 113(3)     | B10-B9-H89     | 119(2)     |
| B10-B9-H910    | 42.8(19)   | H89-B9-H910    | 96(3)      |
| Os5-B10-B1     | 65.12(19)  | Os5-B10-B4     | 119.7(3)   |
| Os5-B10-B9     | 123.3(3)   | Os5-B10-H10    | 116(2)     |
| Os5-B10-H910   | 88(2)      | B1-B10-B4      | 61.4(2)    |
| B1-B10-B9      | 108.4(3)   | B1-B10-H10     | 128(2)     |
| B1-B10-H910    | 126(2)     | B4-B10-B9      | 56.4(2)    |
| B4-B10-H10     | 117(2)     | B4-B10-H910    | 102(2)     |
| B9-B10-H10     | 110(2)     | B9-B10-H910    | 49(2)      |
| H10-B10-H910   | 106(3)     | Os5-C1-O1      | 172.4(3)   |
| Os5-P1-C111    | 114.36(11) | Os5-P1-C121    | 118.83(12) |
| Os5-P1-C131    | 115.64(12) | C111-P1-C121   | 102.29(16) |
| C111-P1-C131   | 99.85(16)  | C121-P1-C131   | 103.30(16) |
| P1-C111-C112   | 123.3(3)   | P1-C111-C116   | 118.0(3)   |
| C112-C111-C116 | 118.7(3)   | C111-C112-H112 | 119.8      |
| C111-C112-C113 | 120.4(4)   | H112-C112-C113 | 119.8      |
| C112-C113-H113 | 119.8      | C112-C113-C114 | 120.3(4)   |
| H113-C113-C114 | 119.8      | C113-C114-H114 | 120.2      |
| C113-C114-C115 | 119.7(4)   | H114-C114-C115 | 120.2      |
| C114-C115-H115 | 119.9      | C114-C115-C116 | 120.2(4)   |
| H115-C115-C116 | 119.9      | C111-C116-C115 | 120.6(4)   |
| C111-C116-H116 | 119.7      | C115-C116-H116 | 119.7      |
| P1-C121-C122   | 119.6(3)   | P1-C121-C126   | 121.7(3)   |
| C122-C121-C126 | 118.6(3)   | C121-C122-H122 | 119.6      |
| C121-C122-C123 | 120.9(4)   | H122-C122-C123 | 119.6      |
| C122-C123-H123 | 120.1      | C122-C123-C124 | 119.7(4)   |
| H123-C123-C124 | 120.1      | C123-C124-H124 | 120.0      |
| C123-C124-C125 | 120.1(3)   | H124-C124-C125 | 120.0      |
| C124-C125-H125 | 119.9      | C124-C125-C126 | 120.2(4)   |
| H125-C125-C126 | 119.9      | C121-C126-C125 | 120.5(3)   |
| C121-C126-H126 | 119.7      | C125-C126-H126 | 119.7      |
| P1-C131-C132   | 120.6(3)   | P1-C131-C136   | 121.3(3)   |
| C132-C131-C136 | 118.0(3)   | C131-C132-H132 | 119.6      |
| C131-C132-C133 | 120.9(4)   | H132-C132-C133 | 119.6      |
| C132-C133-H133 | 119.8      | C132-C133-C134 | 120.4(4)   |
| H133-C133-C134 | 119.8      | C133-C134-H134 | 120.2      |
| C133-C134-C135 | 119.6(4)   | H134-C134-C135 | 120.2      |
| C134-C135-H135 | 120.1      | C134-C135-C136 | 119.8(4)   |
| H135-C135-C136 | 120.1      | C131-C136-C135 | 121.3(4)   |
| C131-C136-H136 | 119.3      | C135-C136-H136 | 119.3      |
| Os5-P2-C211    | 116.87(12) | Os5-P2-C221    | 108.71(12) |
| Os5-P2-C231    | 123.58(11) | C211-P2-C221   | 105.05(17) |
| C211-P2-C231   | 99.77(17)  | C221-P2-C231   | 100.41(16) |
| P2-C211-C212   | 122.1(3)   | P2-C211-C216   | 119.2(3)   |
| C212-C211-C216 | 118.7(3)   | C211-C212-H212 | 119.6      |
| C211-C212-C213 | 120.9(4)   | H212-C212-C213 | 119.6      |
| C212-C213-H213 | 120.0      | C212-C213-C214 | 120.0(4)   |
| H213-C213-C214 | 120.0      | C213-C214-H214 | 120.0      |
| C213-C214-C215 | 120.0(4)   | H214-C214-C215 | 120.0      |
| C214-C215-H215 | 120.0      | C214-C215-C216 | 120.1(4)   |
| H215-C215-C216 | 120.0      | C211-C216-C215 | 120.3(4)   |
| C211-C216-H216 | 119.9      | C215-C216-H216 | 119.9      |

|                  |           |                  |           |
|------------------|-----------|------------------|-----------|
| P2-C221-C222     | 119.5(3)  | P2-C221-C226     | 122.6(3)  |
| C222-C221-C226   | 117.9(3)  | C221-C222-H222   | 119.3     |
| C221-C222-C223   | 121.4(4)  | H222-C222-C223   | 119.3     |
| C222-C223-H223   | 120.0     | C222-C223-C224   | 120.0(4)  |
| H223-C223-C224   | 120.0     | C223-C224-H224   | 120.2     |
| C223-C224-C225   | 119.6(4)  | H224-C224-C225   | 120.2     |
| C224-C225-H225   | 119.7     | C224-C225-C226   | 120.6(4)  |
| H225-C225-C226   | 119.7     | C221-C226-C225   | 120.4(4)  |
| C221-C226-H226   | 119.8     | C225-C226-H226   | 119.8     |
| P2-C231-C232     | 121.4(3)  | P2-C231-C236     | 120.8(3)  |
| C232-C231-C236   | 117.7(3)  | C231-C232-H232   | 119.4     |
| C231-C232-C233   | 121.2(4)  | H232-C232-C233   | 119.4     |
| C232-C233-H233   | 119.8     | C232-C233-C234   | 120.4(4)  |
| H233-C233-C234   | 119.8     | C233-C234-H234   | 120.1     |
| C233-C234-C235   | 119.8(4)  | H234-C234-C235   | 120.1     |
| C234-C235-H235   | 119.9     | C234-C235-C236   | 120.3(4)  |
| H235-C235-C236   | 119.9     | C231-C236-C235   | 120.6(4)  |
| C231-C236-H236   | 119.7     | C235-C236-H236   | 119.7     |
| H2A-C2-C11       | 107.9     | H2A-C2-C12       | 107.9     |
| H2A-C2-C13       | 107.9     | C11-C2-C12       | 110.8(11) |
| C11-C2-C13       | 113.8(11) | C12-C2-C13       | 108.3(11) |
| H2'-C2'-C11'     | 111.3     | H2'-C2'-C12'     | 111.3     |
| H2'-C2'-C13'     | 111.3     | C11'-C2'-C12'    | 112.3(13) |
| C11'-C2'-C13'    | 107.5(12) | C12'-C2'-C13'    | 102.7(12) |
| H2''-C2''-C11''  | 117.8     | H2''-C2''-C12''  | 117.8     |
| H2''-C2''-C13''  | 117.8     | C11''-C2''-C12'' | 103.0(15) |
| C11''-C2''-C13'' | 97.4(13)  | C12''-C2''-C13'' | 99.4(14)  |

## DFT CALCULATIONS

### 1. Tables of the DFT B3LYP/6-31G\*/LANL2DZ optimized geometries (Cartesian coordinates, in Angstroms). Energies (in Hartrees) in parenthesis.

**Table S5** Asymmetric isomer, [6,6,6-H(PPh<sub>3</sub>)<sub>2</sub>-*nido*-6-IrB<sub>9</sub>H<sub>13</sub>] (**1**) (-2408.761959)

|    | <b>x</b>    | <b>y</b>    | <b>z</b>    |
|----|-------------|-------------|-------------|
| B  | -1.02495600 | 4.28809600  | 0.17720000  |
| B  | -0.11564300 | 4.38244900  | -1.36659800 |
| B  | -0.92853200 | 2.69982500  | 0.87286700  |
| B  | 0.43848300  | 5.32462700  | 0.05245700  |
| B  | 0.15127600  | 4.29526600  | 1.47452400  |
| B  | 1.59078700  | 4.43658200  | -0.98529100 |
| B  | 1.77672700  | 4.53929800  | 0.78758300  |
| H  | -2.04233900 | 4.86093100  | 0.42117900  |
| H  | -0.42558500 | 5.01724600  | -2.32710500 |
| H  | -1.83910400 | 2.44601800  | 1.60028500  |
| H  | 0.32733400  | 6.50905400  | 0.05760000  |
| H  | -0.04094200 | 4.66226900  | 2.59023700  |
| H  | 2.43364300  | 4.92686200  | -1.66644500 |
| H  | 2.71453400  | 4.97744700  | 1.36995800  |
| B  | -1.06039900 | 2.92554600  | -0.97781000 |
| H  | -2.07512500 | 2.81438100  | -1.58722000 |
| Ir | 0.01633900  | 1.01094800  | -0.43541800 |
| P  | -1.89242500 | -0.30362800 | -0.01471300 |
| P  | 1.78727400  | -0.56509800 | -0.01402500 |
| B  | 0.59732300  | 2.85478400  | -1.73755600 |
| H  | 0.89115700  | 2.62759100  | -2.86979000 |
| H  | 2.22136900  | 3.66332900  | -0.12581600 |
| H  | 1.24389300  | 3.55869700  | 1.52058500  |
| H  | 0.02949500  | 1.85214700  | 1.19397000  |
| H  | 1.34822900  | 2.02268700  | -0.96600600 |
| H  | -0.04038800 | 0.39630600  | -1.90593000 |
| C  | 1.63401200  | -1.95501700 | 1.21057400  |
| C  | 2.14262100  | -1.84802900 | 2.51547500  |
| C  | 0.95228800  | -3.13161700 | 0.85385400  |
| C  | 1.96528800  | -2.88150200 | 3.43795600  |
| H  | 2.69213800  | -0.96376200 | 2.81784700  |
| C  | 0.78265000  | -4.16455500 | 1.77601500  |
| H  | 0.56368000  | -3.25445000 | -0.15035700 |
| C  | 1.28396200  | -4.04259600 | 3.07304800  |
| H  | 2.37190200  | -2.77793300 | 4.44052100  |
| H  | 0.25425900  | -5.06457100 | 1.47444400  |
| H  | 1.14945800  | -4.84763900 | 3.79037700  |
| C  | 3.24628300  | 0.37762800  | 0.64212400  |
| C  | 4.53938900  | 0.20802000  | 0.12451300  |
| C  | 3.06088600  | 1.28831900  | 1.69703400  |
| C  | 5.61524300  | 0.92702000  | 0.65050100  |

|   |             |             |             |
|---|-------------|-------------|-------------|
| H | 4.71414800  | -0.48110900 | -0.69374400 |
| C | 4.14007400  | 1.99371900  | 2.23191500  |
| H | 2.06716900  | 1.44816500  | 2.10488800  |
| C | 5.42144600  | 1.81727800  | 1.70658700  |
| H | 6.60735500  | 0.78721200  | 0.22976900  |
| H | 3.97355500  | 2.69170100  | 3.04735600  |
| H | 6.25993500  | 2.37585200  | 2.11300700  |
| C | 2.48847600  | -1.40057300 | -1.51220000 |
| C | 3.19413500  | -2.61309000 | -1.43272700 |
| C | 2.38627700  | -0.76089600 | -2.75818000 |
| C | 3.76359200  | -3.17997100 | -2.57443700 |
| H | 3.30091900  | -3.11985200 | -0.47954900 |
| C | 2.96316000  | -1.32648300 | -3.89671900 |
| H | 1.85527100  | 0.18166900  | -2.83857200 |
| C | 3.64769600  | -2.53982900 | -3.80972400 |
| H | 4.29991700  | -4.12186000 | -2.49499400 |
| H | 2.87355500  | -0.81555000 | -4.85147000 |
| H | 4.09123400  | -2.98229400 | -4.69770100 |
| C | -1.83154700 | -2.01788700 | -0.72525000 |
| C | -2.43033900 | -3.10632400 | -0.07226200 |
| C | -1.21706000 | -2.23885600 | -1.96960600 |
| C | -2.41053700 | -4.37987100 | -0.64468800 |
| H | -2.90640300 | -2.96889700 | 0.89188400  |
| C | -1.20164500 | -3.51200600 | -2.54273100 |
| H | -0.74094300 | -1.41544800 | -2.49010100 |
| C | -1.79589900 | -4.58818800 | -1.88039300 |
| H | -2.87710100 | -5.20945600 | -0.11988100 |
| H | -0.71832600 | -3.65955700 | -3.50455700 |
| H | -1.78038100 | -5.57998100 | -2.32427000 |
| C | -2.38360700 | -0.56719100 | 1.74692800  |
| C | -3.71263800 | -0.84880200 | 2.10847600  |
| C | -1.40741500 | -0.52358700 | 2.75153600  |
| C | -4.04973900 | -1.08653800 | 3.44160200  |
| H | -4.48886900 | -0.87357400 | 1.35073300  |
| C | -1.74544100 | -0.76413900 | 4.08391200  |
| H | -0.38134700 | -0.29313200 | 2.49135900  |
| C | -3.06682300 | -1.04548000 | 4.43258800  |
| H | -5.08275700 | -1.29760600 | 3.70469000  |
| H | -0.97410100 | -0.72541600 | 4.84800000  |
| H | -3.33156600 | -1.22602700 | 5.47098500  |
| C | -3.44527100 | 0.36080600  | -0.78242700 |
| C | -4.10636200 | 1.44853500  | -0.18824100 |
| C | -3.96491000 | -0.17806700 | -1.96758000 |
| C | -5.26452800 | 1.97187100  | -0.75968200 |
| H | -3.71125500 | 1.89661700  | 0.71615200  |
| C | -5.12059900 | 0.35540000  | -2.54330400 |
| H | -3.47874500 | -1.01961100 | -2.44765900 |
| C | -5.77525200 | 1.42850000  | -1.94054800 |
| H | -5.75985600 | 2.81468500  | -0.28576400 |
| H | -5.50751200 | -0.07570600 | -3.46277300 |
| H | -6.67483900 | 1.84211100  | -2.38838000 |

**Table S6.** Symmetric isomer of [6,6,6-H(PPh<sub>3</sub>)<sub>2</sub>-*nido*-6-IrB<sub>9</sub>H<sub>13</sub>] (-2408.752057)

|    | <b>x</b>    | <b>y</b>    | <b>z</b>    |
|----|-------------|-------------|-------------|
| B  | 0.56929400  | 4.31145700  | 1.10311500  |
| B  | -1.19790200 | 4.14561800  | 1.11563100  |
| B  | 1.27468000  | 2.89401700  | 0.37259700  |
| B  | -0.42779800 | 5.42558500  | 0.11748900  |
| B  | 1.06333300  | 4.68514900  | -0.53551400 |
| B  | -1.77380400 | 4.43570800  | -0.51756000 |
| B  | -0.39744600 | 4.96995800  | -1.53307100 |
| H  | 1.25661200  | 4.80406400  | 1.94408100  |
| H  | -1.95441000 | 4.50358700  | 1.96533600  |
| H  | 2.39617300  | 2.67000200  | 0.68370900  |
| H  | -0.52830400 | 6.56661500  | 0.43979300  |
| H  | 2.05960000  | 5.26325000  | -0.83216800 |
| H  | -2.86394900 | 4.82371800  | -0.79193500 |
| H  | -0.45750300 | 5.64216400  | -2.51118800 |
| B  | -0.17030600 | 2.73364100  | 1.42029000  |
| H  | -0.12430300 | 2.37971500  | 2.56108200  |
| Ir | -0.03649000 | 1.08964000  | -0.32868600 |
| P  | -1.81413900 | -0.49241700 | -0.05710500 |
| P  | 1.85597600  | -0.32175900 | -0.02475600 |
| B  | -1.63401200 | 2.63331000  | 0.36936300  |
| H  | -2.70099200 | 2.18958800  | 0.65253300  |
| H  | -1.27117700 | 3.98107900  | -1.66010100 |
| H  | 0.62826700  | 4.13276200  | -1.66048600 |
| H  | 1.09841200  | 2.32546800  | -0.84910600 |
| H  | -1.31772300 | 2.17031400  | -0.85608000 |
| H  | -0.00174600 | 0.48776900  | -1.82851900 |
| C  | 2.20125200  | -1.67267500 | -1.25356500 |
| C  | 3.41398000  | -2.38388800 | -1.16568100 |
| C  | 1.34309000  | -1.94969500 | -2.32236700 |
| C  | 3.73569100  | -3.36389700 | -2.10259100 |
| H  | 4.12108700  | -2.15737600 | -0.37373200 |
| C  | 1.66945000  | -2.92649000 | -3.26706500 |
| H  | 0.41878000  | -1.39635100 | -2.42362600 |
| C  | 2.86193000  | -3.63918900 | -3.15790500 |
| H  | 4.67637700  | -3.90112600 | -2.01641900 |
| H  | 0.98560100  | -3.12489200 | -4.08740400 |
| H  | 3.11718300  | -4.39675400 | -3.89411500 |
| C  | 1.89109400  | -1.12627400 | 1.63959100  |
| C  | 1.63656300  | -0.30874900 | 2.75458200  |
| C  | 2.16243500  | -2.48774900 | 1.84533900  |
| C  | 1.67292400  | -0.84019800 | 4.04419200  |
| H  | 1.40354300  | 0.74154700  | 2.61271600  |
| C  | 2.18394900  | -3.01763900 | 3.13782300  |
| H  | 2.34946500  | -3.14173600 | 1.00118500  |
| C  | 1.94420200  | -2.19593500 | 4.23985000  |
| H  | 1.47904100  | -0.19225200 | 4.89440500  |
| H  | 2.39105900  | -4.07511500 | 3.27983900  |
| H  | 1.96394600  | -2.61012600 | 5.24428800  |
| C  | 3.49597200  | 0.53352300  | -0.13980600 |
| C  | 4.41674600  | 0.56415700  | 0.91330000  |
| C  | 3.83576900  | 1.13409800  | -1.36281900 |
| C  | 5.65500400  | 1.19199100  | 0.74816700  |

|   |             |             |             |
|---|-------------|-------------|-------------|
| H | 4.17397500  | 0.10930200  | 1.86742900  |
| C | 5.06952400  | 1.75966800  | -1.52354800 |
| H | 3.13095600  | 1.11919600  | -2.18976200 |
| C | 5.98355000  | 1.79167600  | -0.46630700 |
| H | 6.35829900  | 1.21341600  | 1.57632000  |
| H | 5.31648000  | 2.22606500  | -2.47330800 |
| H | 6.94444600  | 2.28336600  | -0.59083500 |
| C | -1.56189400 | -2.23703800 | -0.64257400 |
| C | -0.83999600 | -3.12720600 | 0.16950900  |
| C | -2.08490200 | -2.70793900 | -1.85568900 |
| C | -0.63801800 | -4.44865700 | -0.22639200 |
| H | -0.44595100 | -2.79457200 | 1.12369800  |
| C | -1.88021000 | -4.03262700 | -2.25087800 |
| H | -2.66618400 | -2.05004900 | -2.49215300 |
| C | -1.15511900 | -4.90597600 | -1.44015900 |
| H | -0.07981600 | -5.12196700 | 0.41859300  |
| H | -2.29998100 | -4.38085400 | -3.19098700 |
| H | -1.00102400 | -5.93698500 | -1.74674000 |
| C | -2.46716600 | -0.81535600 | 1.64330400  |
| C | -3.32801100 | -1.90540600 | 1.87576200  |
| C | -2.13013400 | 0.02080700  | 2.71433100  |
| C | -3.84792900 | -2.13883700 | 3.14775300  |
| H | -3.59208000 | -2.57581400 | 1.06397400  |
| C | -2.65007400 | -0.21974100 | 3.98913600  |
| H | -1.46605400 | 0.86028700  | 2.55537000  |
| C | -3.50939200 | -1.29498500 | 4.20923200  |
| H | -4.51423600 | -2.98202300 | 3.30934900  |
| H | -2.37891200 | 0.44138300  | 4.80751300  |
| H | -3.91313500 | -1.47916400 | 5.20132900  |
| C | -3.28515700 | 0.04697500  | -1.04921100 |
| C | -4.58974700 | 0.01396300  | -0.53799100 |
| C | -3.08965600 | 0.49323600  | -2.36790100 |
| C | -5.67188600 | 0.40770200  | -1.32842300 |
| H | -4.76960600 | -0.30078700 | 0.48334900  |
| C | -4.17371400 | 0.87422400  | -3.15903100 |
| H | -2.08456100 | 0.55846900  | -2.77214000 |
| C | -5.46961500 | 0.83381200  | -2.64064600 |
| H | -6.67423800 | 0.38720300  | -0.90939100 |
| H | -4.00143600 | 1.21563500  | -4.17617800 |
| H | -6.31299900 | 1.14200000  | -3.25244600 |

**Table S7** Asymmetric isomer, [6,6,6-H(PPh<sub>3</sub>)<sub>2</sub>-*nido*-6-RhB<sub>9</sub>H<sub>13</sub>] (**2**) (-2413.541592)

|   | <b>x</b>    | <b>y</b>   | <b>z</b>    |
|---|-------------|------------|-------------|
| B | -1.17308900 | 4.34338100 | 0.08832100  |
| B | -0.27244100 | 4.43353100 | -1.46759300 |
| B | -1.01959500 | 2.79749600 | 0.85603800  |
| B | 0.24882900  | 5.43564700 | -0.07734900 |
| B | 0.00821400  | 4.44738600 | 1.37802500  |
| B | 1.43084900  | 4.56894900 | -1.09844600 |
| B | 1.62062400  | 4.71842800 | 0.67294600  |
| H | -2.21498400 | 4.88366700 | 0.30070200  |
| H | -0.62878900 | 5.03123800 | -2.43560800 |
| H | -1.94358900 | 2.54364500 | 1.56787600  |



|    |             |             |             |
|----|-------------|-------------|-------------|
| H  | 0.08742500  | 6.61385700  | -0.10775700 |
| H  | -0.18639300 | 4.84248000  | 2.48372400  |
| H  | 2.25353200  | 5.07986300  | -1.78910300 |
| H  | 2.54469600  | 5.20911200  | 1.23518600  |
| B  | -1.14353600 | 2.94232000  | -1.02578700 |
| H  | -2.15707000 | 2.75409600  | -1.61799400 |
| Rh | -0.03148900 | 1.09209800  | -0.45757200 |
| P  | -1.92874700 | -0.25789000 | -0.04431700 |
| P  | 1.83650500  | -0.46490900 | -0.04058800 |
| B  | 0.51144600  | 2.93729800  | -1.81077900 |
| H  | 0.79039800  | 2.70854800  | -2.94756600 |
| H  | 2.08925700  | 3.83645200  | -0.22248900 |
| H  | 1.12830200  | 3.74664200  | 1.43972600  |
| H  | -0.06176200 | 2.01045100  | 1.16904500  |
| H  | 1.24385300  | 2.14668800  | -1.04504000 |
| H  | -0.11207600 | 0.49402100  | -1.89456500 |
| C  | 1.76983400  | -1.86053800 | 1.18220500  |
| C  | 2.33785900  | -1.75611700 | 2.46223400  |
| C  | 1.08312500  | -3.04158000 | 0.84863100  |
| C  | 2.21627500  | -2.79917500 | 3.38344200  |
| H  | 2.88908200  | -0.86613700 | 2.74466800  |
| C  | 0.96991000  | -4.08352300 | 1.76882500  |
| H  | 0.64641900  | -3.15965600 | -0.13668800 |
| C  | 1.53189000  | -3.96545600 | 3.04159500  |
| H  | 2.66837200  | -2.69859800 | 4.36667600  |
| H  | 0.43734700  | -4.98725000 | 1.48603400  |
| H  | 1.44060800  | -4.77728000 | 3.75808600  |
| C  | 3.24731800  | 0.55864000  | 0.59175400  |
| C  | 4.54289900  | 0.46206900  | 0.06190900  |
| C  | 3.01612900  | 1.46487600  | 1.64166000  |
| C  | 5.57852600  | 1.24790200  | 0.57251800  |
| H  | 4.74909800  | -0.22227900 | -0.75343700 |
| C  | 4.05667400  | 2.23659800  | 2.16174600  |
| H  | 2.01730600  | 1.56962300  | 2.05633400  |
| C  | 5.34128900  | 2.13246800  | 1.62489000  |
| H  | 6.57368200  | 1.16439800  | 0.14404500  |
| H  | 3.85725500  | 2.92941000  | 2.97424900  |
| H  | 6.14879700  | 2.74276800  | 2.01948600  |
| C  | 2.54581700  | -1.26054400 | -1.55381700 |
| C  | 3.29529900  | -2.44767300 | -1.49932300 |
| C  | 2.38712400  | -0.61859400 | -2.79308200 |
| C  | 3.85723800  | -2.98607800 | -2.65839600 |
| H  | 3.44122700  | -2.95669800 | -0.55241500 |
| C  | 2.95695200  | -1.15557700 | -3.94889600 |
| H  | 1.81751600  | 0.30307200  | -2.85534100 |
| C  | 3.68851200  | -2.34285200 | -3.88604400 |
| H  | 4.42933900  | -3.90819100 | -2.59866300 |
| H  | 2.82419300  | -0.64365800 | -4.89808500 |
| H  | 4.12656200  | -2.76329600 | -4.78734400 |
| C  | -1.79985300 | -1.97298400 | -0.74052100 |
| C  | -2.36115900 | -3.07734600 | -0.08040300 |
| C  | -1.16825400 | -2.18099700 | -1.97818300 |
| C  | -2.28806800 | -4.35414900 | -0.64090800 |
| H  | -2.85079500 | -2.94778400 | 0.87819700  |
| C  | -1.09941600 | -3.45773000 | -2.53938400 |

|   |             |             |             |
|---|-------------|-------------|-------------|
| H | -0.72040600 | -1.34362100 | -2.50252200 |
| C | -1.65652400 | -4.54960300 | -1.87048000 |
| H | -2.72674300 | -5.19647700 | -0.11238100 |
| H | -0.60277800 | -3.59545200 | -3.49582900 |
| H | -1.59921200 | -5.54421800 | -2.30448700 |
| C | -2.37218100 | -0.53165700 | 1.72716000  |
| C | -3.68912700 | -0.80444600 | 2.13455400  |
| C | -1.35714900 | -0.50770400 | 2.69376200  |
| C | -3.97709800 | -1.05041300 | 3.47798500  |
| H | -4.49259500 | -0.81663500 | 1.40549300  |
| C | -1.64604400 | -0.75832000 | 4.03540600  |
| H | -0.33935500 | -0.28601600 | 2.39449600  |
| C | -2.95686400 | -1.02855900 | 4.43103800  |
| H | -5.00128100 | -1.25422700 | 3.77870300  |
| H | -0.84565000 | -0.73654700 | 4.76969000  |
| H | -3.18407900 | -1.21634800 | 5.47700000  |
| C | -3.51269200 | 0.33959200  | -0.79618200 |
| C | -4.18353700 | 1.43395100  | -0.22491100 |
| C | -4.04896700 | -0.25503500 | -1.94712600 |
| C | -5.36868900 | 1.90813100  | -0.78378300 |
| H | -3.77462800 | 1.92530200  | 0.65056300  |
| C | -5.23153300 | 0.23018600  | -2.51073200 |
| H | -3.55390100 | -1.10160700 | -2.40930700 |
| C | -5.89624500 | 1.30945200  | -1.93003500 |
| H | -5.87165700 | 2.75650500  | -0.32821200 |
| H | -5.63142900 | -0.24314500 | -3.40348900 |
| H | -6.81655900 | 1.68538200  | -2.36884700 |

**Table S8** Symmetric isomer, [6,6,6-H(PPh<sub>3</sub>)<sub>2</sub>-nido-6-RhB<sub>9</sub>H<sub>13</sub>] (**1**) (-2413.528223)

|    | <b>x</b>    | <b>y</b>    | <b>z</b>    |
|----|-------------|-------------|-------------|
| B  | 0.62641100  | 4.42842100  | 1.01388500  |
| B  | -1.13923100 | 4.29699000  | 0.99976600  |
| B  | 1.31196800  | 2.96892300  | 0.33272600  |
| B  | -0.32714300 | 5.52180400  | -0.03370000 |
| B  | 1.16135400  | 4.72168700  | -0.63085200 |
| B  | -1.68211300 | 4.52965400  | -0.65720100 |
| B  | -0.27697100 | 5.00993700  | -1.66794100 |
| H  | 1.30988500  | 4.93523700  | 1.84971800  |
| H  | -1.90269500 | 4.69902200  | 1.82331300  |
| H  | 2.41895600  | 2.71525400  | 0.67980900  |
| H  | -0.41123900 | 6.67679600  | 0.24087900  |
| H  | 2.17484300  | 5.26822600  | -0.92991600 |
| H  | -2.75956600 | 4.92715200  | -0.96692300 |
| H  | -0.30664300 | 5.66274900  | -2.66080000 |
| B  | -0.14706200 | 2.87366600  | 1.35681800  |
| H  | -0.12852200 | 2.53564400  | 2.50448100  |
| Rh | -0.01971500 | 1.15858200  | -0.35229800 |
| P  | -1.85055700 | -0.39188900 | -0.07770300 |
| P  | 1.88025000  | -0.26865300 | -0.04468800 |
| B  | -1.59460100 | 2.76565700  | 0.28706700  |
| H  | -2.66825200 | 2.34402700  | 0.58479500  |
| H  | -1.16469700 | 4.04175900  | -1.78628900 |
| H  | 0.72894100  | 4.15512900  | -1.75630400 |

|   |             |             |             |
|---|-------------|-------------|-------------|
| H | 1.13335800  | 2.39366900  | -0.84828200 |
| H | -1.27894100 | 2.27701400  | -0.89037600 |
| H | 0.01338200  | 0.53008100  | -1.80897600 |
| C | 2.19013300  | -1.66338600 | -1.22858200 |
| C | 3.38310900  | -2.40456200 | -1.12191800 |
| C | 1.32107000  | -1.94521500 | -2.28740100 |
| C | 3.67508700  | -3.41776600 | -2.03285500 |
| H | 4.09704500  | -2.17616600 | -0.33654400 |
| C | 1.61799500  | -2.95576000 | -3.20574500 |
| H | 0.41126000  | -1.36912000 | -2.40004800 |
| C | 2.79123900  | -3.69705500 | -3.07886600 |
| H | 4.60073300  | -3.97844000 | -1.93427600 |
| H | 0.92685400  | -3.15835000 | -4.01886000 |
| H | 3.02391400  | -4.48100300 | -3.79462700 |
| C | 1.91172200  | -1.00879000 | 1.64648500  |
| C | 1.71097700  | -0.13856200 | 2.73279100  |
| C | 2.11374300  | -2.37467900 | 1.89822400  |
| C | 1.73372200  | -0.62507000 | 4.04008500  |
| H | 1.52815300  | 0.91646500  | 2.55451300  |
| C | 2.12273300  | -2.85780700 | 3.20909600  |
| H | 2.25880700  | -3.06675900 | 1.07623200  |
| C | 1.93736300  | -1.98539200 | 4.28224800  |
| H | 1.58221600  | 0.06184300  | 4.86800200  |
| H | 2.27736700  | -3.91864200 | 3.38801800  |
| H | 1.94624600  | -2.36368900 | 5.30087600  |
| C | 3.52064000  | 0.57289400  | -0.20625800 |
| C | 4.47096200  | 0.59562400  | 0.82099800  |
| C | 3.83071900  | 1.16997000  | -1.43857400 |
| C | 5.70988700  | 1.21098400  | 0.61991500  |
| H | 4.25050500  | 0.14483900  | 1.78255400  |
| C | 5.06593200  | 1.78249600  | -1.63508100 |
| H | 3.10151600  | 1.16400300  | -2.24417600 |
| C | 6.00974700  | 1.80623500  | -0.60430500 |
| H | 6.43647600  | 1.22659600  | 1.42783800  |
| H | 5.28985300  | 2.24689700  | -2.59147200 |
| H | 6.97121300  | 2.28894800  | -0.75629800 |
| C | -1.62520500 | -2.15014500 | -0.62780200 |
| C | -0.91006400 | -3.03216500 | 0.19949700  |
| C | -2.15500800 | -2.63749700 | -1.83146000 |
| C | -0.72546900 | -4.36346400 | -0.17067000 |
| H | -0.50731200 | -2.68440400 | 1.14502000  |
| C | -1.96663000 | -3.97198500 | -2.20106100 |
| H | -2.72896400 | -1.98420800 | -2.47943000 |
| C | -1.25099000 | -4.83812000 | -1.37432200 |
| H | -0.17350900 | -5.03098500 | 0.48562300  |
| H | -2.39181800 | -4.33336300 | -3.13375800 |
| H | -1.10983700 | -5.87665400 | -1.66103200 |
| C | -2.52409800 | -0.66044800 | 1.62285700  |
| C | -3.39422200 | -1.73702100 | 1.88167100  |
| C | -2.19003700 | 0.20868600  | 2.66883200  |
| C | -3.92601700 | -1.92577000 | 3.15621800  |
| H | -3.65670800 | -2.43048500 | 1.08898300  |
| C | -2.72195300 | 0.01197800  | 3.94611100  |
| H | -1.52016600 | 1.03963500  | 2.48722000  |
| C | -3.58988800 | -1.05072300 | 4.19290400  |

|   |             |             |             |
|---|-------------|-------------|-------------|
| H | -4.59991100 | -2.75852000 | 3.33919200  |
| H | -2.45341000 | 0.69721600  | 4.74525100  |
| H | -4.00264000 | -1.20077800 | 5.18703900  |
| C | -3.28991300 | 0.16607700  | -1.10053000 |
| C | -4.60316800 | 0.16113900  | -0.61045800 |
| C | -3.06249700 | 0.59862000  | -2.41814400 |
| C | -5.66358300 | 0.57000700  | -1.42209700 |
| H | -4.80526900 | -0.14499500 | 0.40958800  |
| C | -4.12524300 | 0.99517900  | -3.23022300 |
| H | -2.04913000 | 0.64093100  | -2.80528900 |
| C | -5.43014300 | 0.98368200  | -2.73330200 |
| H | -6.67341100 | 0.57114000  | -1.02092500 |
| H | -3.92934700 | 1.32676900  | -4.24631500 |
| H | -6.25669600 | 1.30462900  | -3.36127200 |

**Table S9** Asymmetric isomer, [6,6,6-CO(PPh<sub>3</sub>)<sub>2</sub>-*nido*-6-RuB<sub>9</sub>H<sub>13</sub>] (**3**) (-2510.678579)

|   | <b>x</b>    | <b>y</b>    | <b>z</b>    |
|---|-------------|-------------|-------------|
| B | -0.59108800 | 4.39980300  | 0.15572300  |
| B | 0.36996300  | 4.48482400  | -1.35302600 |
| B | -0.71604800 | 2.75679600  | 0.70922400  |
| B | 0.99447500  | 5.24390800  | 0.14487700  |
| B | 0.52564900  | 4.16654000  | 1.47978800  |
| B | 2.05851900  | 4.28083200  | -0.92102000 |
| B | 2.19099200  | 4.23811900  | 0.86140700  |
| H | -1.54161700 | 5.07244600  | 0.41617000  |
| H | 0.17591600  | 5.21540300  | -2.27455600 |
| H | -1.65682000 | 2.56635500  | 1.41585500  |
| H | 1.03827800  | 6.42952700  | 0.23209600  |
| H | 0.33218700  | 4.47522200  | 2.61268100  |
| H | 2.98496100  | 4.70079700  | -1.53810300 |
| H | 3.15681800  | 4.50683300  | 1.49736200  |
| B | -0.75531300 | 3.12720900  | -1.08962500 |
| H | -1.74868700 | 3.19017800  | -1.74363000 |
| P | -2.01828500 | -0.15634600 | -0.00652500 |
| P | 1.81756100  | -0.59580300 | -0.05790000 |
| B | 0.91025600  | 2.91214200  | -1.80522700 |
| H | 1.18309200  | 2.74248600  | -2.95503000 |
| H | 2.54988200  | 3.37720000  | -0.09855800 |
| H | 1.51084600  | 3.28937200  | 1.50910600  |
| H | 0.13106500  | 1.80472300  | 0.95885800  |
| H | 1.48410600  | 1.95213100  | -1.10193800 |
| C | 1.57520900  | -2.25126000 | 0.74912300  |
| C | 1.98153100  | -2.53536800 | 2.06230100  |
| C | 0.97110500  | -3.27369300 | -0.00184700 |
| C | 1.77769200  | -3.80464000 | 2.61120200  |
| H | 2.47248000  | -1.77556100 | 2.65979800  |
| C | 0.77925400  | -4.54183400 | 0.54352700  |
| H | 0.65796100  | -3.08463900 | -1.02292300 |
| C | 1.17773700  | -4.81096500 | 1.85517600  |
| H | 2.10207900  | -4.00474000 | 3.62902600  |
| H | 0.31087000  | -5.31568100 | -0.05713500 |
| H | 1.02463300  | -5.79862400 | 2.28163900  |
| C | 2.93582500  | 0.27471500  | 1.14248700  |

|    |             |             |             |
|----|-------------|-------------|-------------|
| C  | 4.30440300  | 0.45313200  | 0.89072800  |
| C  | 2.40518000  | 0.76805500  | 2.34842200  |
| C  | 5.12035600  | 1.10075300  | 1.82232700  |
| H  | 4.74101500  | 0.08749100  | -0.03176200 |
| C  | 3.22575300  | 1.39830200  | 3.28443700  |
| H  | 1.34504400  | 0.66480400  | 2.56105200  |
| C  | 4.58710600  | 1.56878300  | 3.02267100  |
| H  | 6.17615800  | 1.23618800  | 1.60420900  |
| H  | 2.79548800  | 1.76990000  | 4.21027600  |
| H  | 5.22328200  | 2.07199100  | 3.74531100  |
| C  | 2.96586100  | -1.03936900 | -1.44861000 |
| C  | 3.77565700  | -2.18760800 | -1.38864900 |
| C  | 3.08331700  | -0.19328500 | -2.56270700 |
| C  | 4.66619200  | -2.48496700 | -2.42057000 |
| H  | 3.71276500  | -2.85358700 | -0.53491100 |
| C  | 3.97845000  | -0.49164300 | -3.59237200 |
| H  | 2.48342300  | 0.70607100  | -2.63358700 |
| C  | 4.76859400  | -1.63924400 | -3.52706000 |
| H  | 5.28013600  | -3.37947700 | -2.35731700 |
| H  | 4.05020900  | 0.17605000  | -4.44630100 |
| H  | 5.46013700  | -1.87379300 | -4.33176900 |
| C  | -2.19976400 | -1.96039500 | -0.42643400 |
| C  | -2.73582000 | -2.87670000 | 0.49124900  |
| C  | -1.89291400 | -2.41445300 | -1.72079600 |
| C  | -2.95299800 | -4.20780200 | 0.12807800  |
| H  | -2.99275600 | -2.55492200 | 1.49381100  |
| C  | -2.11994400 | -3.74238800 | -2.08616600 |
| H  | -1.49273400 | -1.73358400 | -2.46194600 |
| C  | -2.64896600 | -4.64544200 | -1.16114100 |
| H  | -3.36827200 | -4.89928900 | 0.85635900  |
| H  | -1.88501200 | -4.06703000 | -3.09633300 |
| H  | -2.82829500 | -5.67880800 | -1.44603900 |
| C  | -2.34819000 | -0.14608500 | 1.81416300  |
| C  | -3.56472200 | 0.27667000  | 2.36635000  |
| C  | -1.33974200 | -0.60870100 | 2.67464200  |
| C  | -3.75936100 | 0.25408300  | 3.75001200  |
| H  | -4.36090200 | 0.63155100  | 1.72202000  |
| C  | -1.53969700 | -0.64091300 | 4.05408600  |
| H  | -0.40119600 | -0.96567400 | 2.26423400  |
| C  | -2.74962100 | -0.20148000 | 4.59718200  |
| H  | -4.70501200 | 0.59566400  | 4.16209400  |
| H  | -0.74966700 | -1.00880900 | 4.70338900  |
| H  | -2.90362800 | -0.21668400 | 5.67270300  |
| C  | -3.57592600 | 0.53600000  | -0.75260500 |
| C  | -3.89848900 | 1.89114800  | -0.55999600 |
| C  | -4.45774200 | -0.26018300 | -1.50187700 |
| C  | -5.06857600 | 2.42777000  | -1.09643900 |
| H  | -3.23829200 | 2.53105000  | 0.00975700  |
| C  | -5.62183100 | 0.28485300  | -2.04853600 |
| H  | -4.24916800 | -1.31019700 | -1.66473000 |
| C  | -5.93225500 | 1.62896000  | -1.84772500 |
| H  | -5.29438500 | 3.47787600  | -0.93389400 |
| H  | -6.28574100 | -0.35011600 | -2.62916300 |
| H  | -6.83829200 | 2.05175900  | -2.27351900 |
| Ru | 0.04321600  | 1.00153300  | -0.67746000 |

|   |             |            |             |
|---|-------------|------------|-------------|
| C | -0.17027400 | 0.40139900 | -2.44567400 |
| O | -0.33554700 | 0.10935200 | -3.55429900 |

**Table S10** Symmetric isomer, [6,6,6-CO(PPh<sub>3</sub>)<sub>2</sub>-*nido*-6-RuB<sub>9</sub>H<sub>13</sub>] (**3**) (-2510.670697)

|   | x           | y           | z           |
|---|-------------|-------------|-------------|
| B | -1.00356800 | -4.23396200 | 0.86605200  |
| B | 0.77321200  | -4.27358000 | 0.90896000  |
| B | -1.53426000 | -2.80153400 | 0.03914300  |
| B | -0.11738600 | -5.50504900 | -0.04009400 |
| B | -1.50585800 | -4.64559600 | -0.76350600 |
| B | 1.34267000  | -4.70968500 | -0.68925300 |
| B | -0.06439300 | -5.12171400 | -1.71287000 |
| H | -1.75034500 | -4.60443500 | 1.71835000  |
| H | 1.45859500  | -4.67291700 | 1.79968200  |
| H | -2.64264900 | -2.44423400 | 0.28269700  |
| H | -0.15222000 | -6.63418600 | 0.33330100  |
| H | -2.55342300 | -5.12455100 | -1.06105800 |
| H | 2.38346600  | -5.23252000 | -0.93063400 |
| H | -0.05511900 | -5.82970600 | -2.66702000 |
| B | -0.08580700 | -2.72453400 | 1.11264500  |
| H | -0.09124100 | -2.29875200 | 2.22625800  |
| P | 1.89105900  | 0.27452500  | 0.07943900  |
| P | -1.90165700 | 0.35884200  | -0.06170300 |
| B | 1.40343300  | -2.86104400 | 0.11652700  |
| H | 2.50798200  | -2.56159200 | 0.43668300  |
| H | 0.91272800  | -4.22778500 | -1.84583100 |
| H | -0.99407800 | -4.18745400 | -1.89617400 |
| H | -1.20290700 | -2.31736200 | -1.14005700 |
| H | 1.18173100  | -2.35466000 | -1.08240300 |
| C | -1.58556700 | 2.18160700  | 0.09716400  |
| C | -1.79970000 | 2.88109000  | 1.29446400  |
| C | -1.17928700 | 2.90075900  | -1.03902000 |
| C | -1.60638700 | 4.26435600  | 1.35400200  |
| H | -2.13450000 | 2.35233600  | 2.17994000  |
| C | -1.00177000 | 4.28183000  | -0.98123700 |
| H | -1.01804400 | 2.38458700  | -1.98031100 |
| C | -1.21117900 | 4.96821800  | 0.21712500  |
| H | -1.78049600 | 4.78921200  | 2.28967000  |
| H | -0.69001300 | 4.81951100  | -1.87147700 |
| H | -1.07036400 | 6.04476900  | 0.26133500  |
| C | -2.81140100 | -0.02031100 | 1.50469800  |
| C | -4.21228800 | -0.05919400 | 1.56641400  |
| C | -2.07424800 | -0.24945900 | 2.67682400  |
| C | -4.85916800 | -0.31605800 | 2.77670900  |
| H | -4.80525400 | 0.09719700  | 0.67276300  |
| C | -2.72470800 | -0.49455700 | 3.88626600  |
| H | -0.99164700 | -0.25790100 | 2.64681100  |
| C | -4.11914100 | -0.53056800 | 3.93986100  |
| H | -5.94488500 | -0.35326000 | 2.80486800  |
| H | -2.13605000 | -0.67496800 | 4.78142900  |
| H | -4.62516900 | -0.73412400 | 4.87974500  |
| C | -3.23589200 | 0.37770100  | -1.35850600 |
| C | -4.11188400 | 1.47455000  | -1.46038500 |

|    |             |             |             |
|----|-------------|-------------|-------------|
| C  | -3.41749700 | -0.70142200 | -2.23586900 |
| C  | -5.13080500 | 1.48987700  | -2.41289600 |
| H  | -3.99900300 | 2.32524100  | -0.79686700 |
| C  | -4.43734600 | -0.68422400 | -3.18976800 |
| H  | -2.76631200 | -1.56345200 | -2.18013900 |
| C  | -5.29560400 | 0.41067500  | -3.28323200 |
| H  | -5.79343000 | 2.34900500  | -2.47472400 |
| H  | -4.55504800 | -1.53124500 | -3.85985400 |
| H  | -6.08628700 | 0.42467700  | -4.02847600 |
| C  | 2.07288600  | 2.03922500  | -0.49725100 |
| C  | 2.45704400  | 3.09682900  | 0.33895500  |
| C  | 2.00320100  | 2.27449800  | -1.88084400 |
| C  | 2.74075700  | 4.35794500  | -0.19212500 |
| H  | 2.55364100  | 2.94565900  | 1.40744700  |
| C  | 2.29907200  | 3.52910000  | -2.41091700 |
| H  | 1.73764900  | 1.47157300  | -2.55946200 |
| C  | 2.66477800  | 4.57957500  | -1.56629600 |
| H  | 3.03392400  | 5.16342300  | 0.47607900  |
| H  | 2.24806100  | 3.68223300  | -3.48566700 |
| H  | 2.89776700  | 5.55809400  | -1.97764400 |
| C  | 2.03721400  | 0.34181800  | 1.91809100  |
| C  | 2.84060600  | -0.57354700 | 2.61703500  |
| C  | 1.24299400  | 1.23702000  | 2.65501600  |
| C  | 2.86889900  | -0.57222500 | 4.01219200  |
| H  | 3.43683400  | -1.29881700 | 2.07632100  |
| C  | 1.27942200  | 1.24005000  | 4.05065700  |
| H  | 0.59158900  | 1.93903400  | 2.14455800  |
| C  | 2.09476700  | 0.33697500  | 4.73427900  |
| H  | 3.49536400  | -1.29110200 | 4.53270200  |
| H  | 0.66410300  | 1.94744800  | 4.60030000  |
| H  | 2.12072000  | 0.33659700  | 5.82051000  |
| C  | 3.56043800  | -0.27959700 | -0.52431300 |
| C  | 3.67910100  | -1.01990700 | -1.70785100 |
| C  | 4.72976200  | 0.16706000  | 0.11205200  |
| C  | 4.93591200  | -1.32614300 | -2.23235500 |
| H  | 2.78925700  | -1.36860900 | -2.21943800 |
| C  | 5.98526700  | -0.14827200 | -0.40722200 |
| H  | 4.66489500  | 0.76449900  | 1.01585300  |
| C  | 6.09235600  | -0.89741800 | -1.58054400 |
| H  | 5.00710400  | -1.90754500 | -3.14745000 |
| H  | 6.87955400  | 0.19694300  | 0.10469200  |
| H  | 7.07067400  | -1.14216900 | -1.98504100 |
| Ru | -0.00636300 | -1.11510100 | -0.63065700 |
| C  | 0.00397000  | -0.43775900 | -2.40183200 |
| O  | -0.00573200 | -0.21897800 | -3.54293700 |

**Table S11** Asymmetric isomer, [6,6,6-CO(PPh<sub>3</sub>)<sub>2</sub>-nido-6-OsB<sub>9</sub>H<sub>13</sub>] (**4**) (-2507.866089)

|   | x           | y          | x           |
|---|-------------|------------|-------------|
| B | -0.50410600 | 4.31643700 | 0.31720800  |
| B | 0.42926300  | 4.42613600 | -1.20408600 |
| B | -0.65665300 | 2.65597600 | 0.81291900  |
| B | 1.09746900  | 5.12630900 | 0.30342300  |
| B | 0.63037800  | 4.01447800 | 1.61172600  |

|   |             |             |             |
|---|-------------|-------------|-------------|
| B | 2.12018000  | 4.17368900  | -0.81078200 |
| B | 2.28639700  | 4.07889300  | 0.96680100  |
| H | -1.43455900 | 4.99681700  | 0.62523100  |
| H | 0.24174900  | 5.18480600  | -2.10397900 |
| H | -1.57789900 | 2.45557900  | 1.54073200  |
| H | 1.16785300  | 6.30736600  | 0.42692900  |
| H | 0.46022300  | 4.29087600  | 2.75655000  |
| H | 3.04022900  | 4.59129500  | -1.43863800 |
| H | 3.26796500  | 4.31056100  | 1.59305400  |
| B | -0.72483400 | 3.09264300  | -0.96314100 |
| H | -1.72771600 | 3.20021400  | -1.59540100 |
| P | -2.00240400 | -0.20229300 | 0.03828500  |
| P | 1.78353900  | -0.66606700 | -0.01803100 |
| B | 0.91428600  | 2.84957200  | -1.70884900 |
| H | 1.17523600  | 2.69721500  | -2.86277400 |
| H | 2.61489500  | 3.24092000  | -0.02410300 |
| H | 1.60127700  | 3.12174900  | 1.59920900  |
| H | 0.18831700  | 1.67143400  | 1.04556400  |
| H | 1.52446600  | 1.85633500  | -1.02576000 |
| C | 1.49294500  | -2.34470500 | 0.72471100  |
| C | 1.85570400  | -2.68039600 | 2.03835200  |
| C | 0.90517400  | -3.33301100 | -0.08229100 |
| C | 1.62244700  | -3.96650300 | 2.53399600  |
| H | 2.33600800  | -1.94865500 | 2.67817100  |
| C | 0.68401400  | -4.61781500 | 0.40994800  |
| H | 0.62773300  | -3.10377900 | -1.10526700 |
| C | 1.03765500  | -4.93818500 | 1.72305100  |
| H | 1.91253000  | -4.20688600 | 3.55345300  |
| H | 0.22823300  | -5.36473400 | -0.23291200 |
| H | 0.86219700  | -5.93911500 | 2.10793500  |
| C | 2.90125400  | 0.13967400  | 1.23013400  |
| C | 4.27365700  | 0.31027300  | 0.99445100  |
| C | 2.37064600  | 0.59148500  | 2.45243300  |
| C | 5.09264600  | 0.90869900  | 1.95618700  |
| H | 4.71217200  | -0.02199200 | 0.06056300  |
| C | 3.19336700  | 1.17261700  | 3.41768000  |
| H | 1.30823500  | 0.49639700  | 2.65575800  |
| C | 4.55865700  | 1.33492300  | 3.17134300  |
| H | 6.15117800  | 1.03927500  | 1.74878900  |
| H | 2.76181000  | 1.51247100  | 4.35501300  |
| H | 5.19691800  | 1.79958800  | 3.91756600  |
| C | 2.95295600  | -1.09727500 | -1.39711100 |
| C | 3.76804900  | -2.24103300 | -1.31852700 |
| C | 3.08866200  | -0.25327700 | -2.51003500 |
| C | 4.68130800  | -2.53581400 | -2.33076600 |
| H | 3.69192100  | -2.90531100 | -0.46454500 |
| C | 4.00534900  | -0.54992300 | -3.52138600 |
| H | 2.48455000  | 0.64134500  | -2.59705700 |
| C | 4.80070000  | -1.69235700 | -3.43744800 |
| H | 5.29866200  | -3.42677300 | -2.25276100 |
| H | 4.08948000  | 0.11562400  | -4.37580900 |
| H | 5.50941500  | -1.92490400 | -4.22766600 |
| C | -2.23590600 | -1.99364900 | -0.41441800 |
| C | -2.79182400 | -2.90959300 | 0.49148000  |
| C | -1.95058400 | -2.43483400 | -1.71844900 |



|    |             |             |             |
|----|-------------|-------------|-------------|
| C  | -3.04817400 | -4.22828800 | 0.10879900  |
| H  | -3.03290900 | -2.59849100 | 1.50120300  |
| C  | -2.21766800 | -3.74981900 | -2.10303700 |
| H  | -1.53765500 | -1.75451900 | -2.45288200 |
| C  | -2.76537200 | -4.65308200 | -1.18922700 |
| H  | -3.47710200 | -4.91962400 | 0.82926100  |
| H  | -1.99914600 | -4.06394200 | -3.12021100 |
| H  | -2.97538500 | -5.67626200 | -1.48959000 |
| C  | -2.34868400 | -0.21795200 | 1.85681300  |
| C  | -3.57261900 | 0.18905100  | 2.40487200  |
| C  | -1.35053500 | -0.69900400 | 2.71840400  |
| C  | -3.78209500 | 0.13711700  | 3.78559100  |
| H  | -4.36349100 | 0.55466200  | 1.76025000  |
| C  | -1.56462700 | -0.76079700 | 4.09472700  |
| H  | -0.40969200 | -1.04880600 | 2.30855300  |
| C  | -2.78062200 | -0.33403900 | 4.63405800  |
| H  | -4.73301800 | 0.46787000  | 4.19435200  |
| H  | -0.78142300 | -1.14226100 | 4.74446800  |
| H  | -2.94619700 | -0.37199100 | 5.70729900  |
| C  | -3.53851100 | 0.54825200  | -0.70128000 |
| C  | -3.85752900 | 1.89175100  | -0.43431100 |
| C  | -4.40611200 | -0.19250700 | -1.51994200 |
| C  | -5.00965700 | 2.46975500  | -0.96615400 |
| H  | -3.20964900 | 2.49071900  | 0.19151700  |
| C  | -5.55176100 | 0.39453200  | -2.06267700 |
| H  | -4.20154100 | -1.23259500 | -1.74032800 |
| C  | -5.85865700 | 1.72594600  | -1.78757600 |
| H  | -5.23298700 | 3.50959900  | -0.74477500 |
| H  | -6.20408900 | -0.19852900 | -2.69811400 |
| H  | -6.75045800 | 2.18169000  | -2.20939800 |
| Os | 0.05893800  | 0.92629400  | -0.62279500 |
| C  | -0.12900200 | 0.30254100  | -2.38248800 |
| O  | -0.27100500 | -0.01067400 | -3.49454700 |

**Table S12** [1,1,1-(CO)H(PPh<sub>3</sub>)-*isocloso*-1-RuB<sub>9</sub>H<sub>8</sub>-μ-(1,2)-{Pt(PMe<sub>2</sub>Ph)<sub>2</sub>}] (**6**) (-2896.913038)

|    | <b>x</b>    | <b>y</b>    | <b>z</b>    |
|----|-------------|-------------|-------------|
| Pt | -1.34680400 | -0.79062800 | -0.34213500 |
| Ru | 1.55691900  | -1.53722600 | -0.54189700 |
| H  | 0.24207900  | -0.19542200 | -0.79685900 |
| B  | -0.19343700 | -2.41232700 | 0.18867900  |
| B  | 1.95792700  | -3.49446800 | -1.50371500 |
| H  | 2.36101000  | -3.65208100 | -2.61162000 |
| B  | 2.52396000  | -2.44400600 | 1.23188500  |
| H  | 3.31788300  | -1.91351400 | 1.94101300  |
| B  | 0.28995700  | -3.56644700 | -1.03277700 |
| H  | -0.48828000 | -3.75934100 | -1.91879700 |
| B  | 2.90554800  | -3.52787300 | -0.05512900 |
| H  | 4.06953900  | -3.74659600 | -0.23078600 |
| B  | 0.84035900  | -2.59262100 | 1.57215500  |
| H  | 0.45124500  | -2.10739700 | 2.59295200  |
| B  | 0.16889100  | -4.02510500 | 0.70697800  |
| H  | -0.64935500 | -4.77768800 | 1.15300900  |

|   |             |             |             |
|---|-------------|-------------|-------------|
| B | 1.51088600  | -4.66725100 | -0.31579000 |
| H | 1.60924200  | -5.83523000 | -0.54079700 |
| B | 1.85532700  | -4.04731200 | 1.33698600  |
| H | 2.18558100  | -4.81525600 | 2.18917100  |
| C | 2.04479700  | -1.05599700 | -2.37132700 |
| O | 2.30033700  | -0.79768800 | -3.46401800 |
| P | -2.19833600 | 1.22280200  | -1.44896800 |
| C | -2.39375600 | 2.76608500  | -0.45360300 |
| C | -2.88864300 | 3.95846300  | -1.00499900 |
| H | -3.18568900 | 3.99720900  | -2.05001600 |
| C | -3.00342400 | 5.10967200  | -0.22519100 |
| H | -3.38944700 | 6.02495000  | -0.66637100 |
| C | -2.62263900 | 5.08663400  | 1.11954900  |
| H | -2.71198500 | 5.98401400  | 1.72604200  |
| C | -2.12801800 | 3.90761100  | 1.67963800  |
| H | -1.82560200 | 3.88284200  | 2.72326900  |
| C | -2.01613200 | 2.75556500  | 0.89690500  |
| H | -1.62456700 | 1.83761500  | 1.32752200  |
| C | -3.82509400 | 1.06953600  | -2.32537100 |
| H | -3.77006000 | 0.20980000  | -3.00161000 |
| H | -4.05956400 | 1.96301400  | -2.91383300 |
| H | -4.62752600 | 0.89348300  | -1.60568900 |
| C | -1.10753900 | 1.75571200  | -2.84536000 |
| H | -0.11646700 | 2.00487200  | -2.46025500 |
| H | -1.51557500 | 2.62030600  | -3.38016900 |
| H | -1.00489700 | 0.91857200  | -3.54361900 |
| P | -3.21109500 | -1.87787400 | 0.48321800  |
| C | -4.80361100 | -0.94785900 | 0.54978900  |
| C | -5.95682300 | -1.36614000 | -0.12998700 |
| H | -5.94283600 | -2.27017300 | -0.73017700 |
| C | -7.13988900 | -0.62620900 | -0.04699400 |
| H | -8.02319800 | -0.96454800 | -0.58205000 |
| C | -7.18810400 | 0.53801400  | 0.71988900  |
| H | -8.10854300 | 1.11171900  | 0.78498000  |
| C | -6.04535800 | 0.96419800  | 1.40250500  |
| H | -6.07183800 | 1.87232000  | 1.99854900  |
| C | -4.86332800 | 0.23004700  | 1.31400700  |
| H | -3.97716100 | 0.58471500  | 1.83358300  |
| C | -3.05060400 | -2.45951300 | 2.22998200  |
| H | -2.19277900 | -3.13234800 | 2.30247800  |
| H | -3.96222300 | -2.97695500 | 2.54692200  |
| H | -2.87365900 | -1.60609000 | 2.89012500  |
| C | -3.61222900 | -3.43159600 | -0.42271800 |
| H | -3.82032400 | -3.21692800 | -1.47471100 |
| H | -4.46511100 | -3.95298000 | 0.02457000  |
| H | -2.72977000 | -4.07471000 | -0.37936900 |
| P | 2.83169000  | 0.46775000  | 0.27012400  |
| C | 4.66947700  | 0.44222800  | 0.06699800  |
| C | 5.33669200  | -0.76849100 | -0.16486800 |
| H | 4.77660900  | -1.69372600 | -0.22094800 |
| C | 6.72471800  | -0.79140500 | -0.32601500 |
| H | 7.22436700  | -1.73900200 | -0.50698400 |
| C | 7.46122800  | 0.39059300  | -0.25827300 |
| H | 8.54032700  | 0.37060400  | -0.38604600 |
| C | 6.80538600  | 1.60380400  | -0.03217100 |

|   |             |            |             |
|---|-------------|------------|-------------|
| H | 7.37092300  | 2.53069000 | 0.01545900  |
| C | 5.42030800  | 1.63157600 | 0.12498700  |
| H | 4.92158500  | 2.58321800 | 0.28220700  |
| C | 2.52843300  | 0.89590600 | 2.04125200  |
| C | 3.54330400  | 1.33152600 | 2.90497000  |
| H | 4.56627600  | 1.40510800 | 2.55325500  |
| C | 3.25051600  | 1.66074000 | 4.23002000  |
| H | 4.04985900  | 1.98874000 | 4.88919600  |
| C | 1.94332200  | 1.56273100 | 4.70785000  |
| H | 1.71906700  | 1.81615800 | 5.74060500  |
| C | 0.92882800  | 1.11969800 | 3.85697900  |
| H | -0.08785000 | 1.01671000 | 4.22748900  |
| C | 1.21902000  | 0.77815600 | 2.53562600  |
| H | 0.43384200  | 0.39331900 | 1.89115800  |
| C | 2.41301000  | 2.04578400 | -0.62022400 |
| C | 1.61174100  | 3.04327300 | -0.04743300 |
| H | 1.23181100  | 2.92414500 | 0.96094200  |
| C | 1.29965100  | 4.20468000 | -0.76034900 |
| H | 0.67274700  | 4.96164100 | -0.29721300 |
| C | 1.78765000  | 4.38884900 | -2.05381900 |
| H | 1.54965400  | 5.29433000 | -2.60565200 |
| C | 2.58656800  | 3.40067100 | -2.63566000 |
| H | 2.97519700  | 3.53318900 | -3.64186900 |
| C | 2.89391700  | 2.23902400 | -1.92760600 |
| H | 3.52782600  | 1.49064200 | -2.39275600 |

**Table S13** [7,7-(PMe<sub>2</sub>Ph)<sub>2</sub>-9,9,9-(CO)(PPh<sub>3</sub>)<sub>2</sub>-nido-7,9-PtOsB<sub>9</sub>H<sub>11</sub>] (**7**). (-3931.277498)

|    | x           | y           | z           |
|----|-------------|-------------|-------------|
| B  | -1.26459500 | -0.06378600 | -3.43509500 |
| H  | -1.55029400 | 0.37008200  | -4.50994300 |
| B  | -2.46243500 | -0.94182100 | -2.51601900 |
| H  | -3.56596000 | -1.12303500 | -2.95035500 |
| B  | -1.08799800 | -1.80362700 | -3.16775600 |
| H  | -1.20354400 | -2.59838300 | -4.05126000 |
| B  | 0.33754800  | -0.72098800 | -3.07592100 |
| H  | 1.08143600  | -0.84798200 | -4.00208800 |
| B  | -1.64070500 | -2.21168700 | -1.55146400 |
| H  | -2.03868900 | -3.29900400 | -1.28129600 |
| B  | -1.88395500 | 0.74023200  | -1.97954200 |
| H  | -2.60845100 | 1.68762600  | -2.06845400 |
| Pt | -2.69381300 | -0.55186600 | -0.30816000 |
| B  | -0.69653700 | 0.78939900  | -0.66663900 |
| H  | -0.73538100 | 1.74251500  | 0.05272200  |
| Os | 1.43521500  | -0.19229100 | -1.11853400 |
| B  | 0.16451900  | -2.06857700 | -1.90921400 |
| H  | 0.70189200  | -3.13079600 | -1.91448400 |
| B  | -0.16556200 | 0.89157800  | -2.39704100 |
| H  | 0.15789100  | 1.93736900  | -2.86749900 |
| H  | -0.55998800 | -2.03016300 | -0.81234000 |
| H  | -0.00403300 | -0.11769400 | 0.01382500  |
| C  | 2.81937000  | -0.18860200 | -2.38037900 |
| O  | 3.64479600  | -0.14885700 | -3.20495200 |
| P  | -3.21749900 | 1.05907800  | 1.42056600  |

|   |             |             |             |
|---|-------------|-------------|-------------|
| C | -3.36849100 | 2.80074300  | 0.84922100  |
| C | -4.34414900 | 3.09736600  | -0.11646700 |
| H | -4.95573700 | 2.30099200  | -0.53177200 |
| C | -4.52771700 | 4.40579200  | -0.56026400 |
| H | -5.28536200 | 4.61905400  | -1.30930400 |
| C | -3.72991100 | 5.43582400  | -0.05577400 |
| H | -3.86897100 | 6.45501900  | -0.40624300 |
| C | -2.75058400 | 5.14874400  | 0.89533800  |
| H | -2.12128800 | 5.94329800  | 1.28762800  |
| C | -2.56995300 | 3.83893800  | 1.34810700  |
| H | -1.79597200 | 3.63735300  | 2.08103200  |
| C | -4.79140300 | 0.90644400  | 2.39532600  |
| H | -5.65558700 | 0.95197300  | 1.72964000  |
| H | -4.85939300 | 1.71955400  | 3.12558400  |
| H | -4.81435100 | -0.05049000 | 2.92521200  |
| C | -1.98314800 | 1.08825500  | 2.78825900  |
| H | -1.97805400 | 0.09922400  | 3.25745300  |
| H | -2.23452400 | 1.83727600  | 3.54614200  |
| H | -0.98577400 | 1.28809700  | 2.39536400  |
| P | -4.43908400 | -2.14649600 | 0.21326000  |
| C | -6.10167900 | -1.35958700 | 0.07225900  |
| C | -7.16075300 | -1.63164300 | 0.95050400  |
| H | -7.02468400 | -2.31505600 | 1.78343800  |
| C | -8.40666900 | -1.02588100 | 0.76996900  |
| H | -9.21592300 | -1.24360500 | 1.46206200  |
| C | -8.61264700 | -0.14808100 | -0.29543000 |
| H | -9.58295100 | 0.32026900  | -0.43632000 |
| C | -7.56633000 | 0.12426300  | -1.18032000 |
| H | -7.71966800 | 0.80254000  | -2.01537700 |
| C | -6.31733400 | -0.47125700 | -0.99625700 |
| H | -5.50423800 | -0.24933000 | -1.68273900 |
| C | -4.66147400 | -3.60444800 | -0.90544500 |
| H | -4.64274100 | -3.27173900 | -1.94612400 |
| H | -5.62122000 | -4.08500000 | -0.68925800 |
| H | -3.84808200 | -4.31796800 | -0.75970100 |
| C | -4.42319000 | -2.98183500 | 1.86594200  |
| H | -5.21523900 | -3.73304500 | 1.95627700  |
| H | -4.52317800 | -2.25450200 | 2.67642300  |
| H | -3.45312600 | -3.47742100 | 1.96938100  |
| P | 2.47579000  | -1.94200700 | 0.21286600  |
| C | 3.47121900  | -3.21559300 | -0.72260300 |
| C | 4.32126700  | -4.09571200 | -0.02644600 |
| H | 4.40203500  | -4.03254700 | 1.05381800  |
| C | 5.07333900  | -5.05291400 | -0.70650200 |
| H | 5.72333100  | -5.72123000 | -0.14755700 |
| C | 4.99683800  | -5.14593500 | -2.09813500 |
| H | 5.58840400  | -5.88671200 | -2.62985100 |
| C | 4.15757200  | -4.28145000 | -2.79919600 |
| H | 4.08650300  | -4.34282500 | -3.88154000 |
| C | 3.39766000  | -3.32709100 | -2.11786100 |
| H | 2.74048900  | -2.67792500 | -2.67911800 |
| C | 3.71255600  | -1.61171800 | 1.57971500  |
| C | 3.47606700  | -1.87626600 | 2.93764400  |
| H | 2.52870700  | -2.29624000 | 3.25630000  |
| C | 4.46064800  | -1.62261500 | 3.89814100  |

|   |             |             |             |
|---|-------------|-------------|-------------|
| H | 4.25584400  | -1.83941100 | 4.94371500  |
| C | 5.70079500  | -1.11245600 | 3.51775300  |
| H | 6.46734600  | -0.92092900 | 4.26403700  |
| C | 5.95253700  | -0.85574700 | 2.16769000  |
| H | 6.91326500  | -0.45797300 | 1.85485400  |
| C | 4.96807500  | -1.09964700 | 1.21196600  |
| H | 5.18476000  | -0.90027100 | 0.16809500  |
| C | 1.22167300  | -2.96892800 | 1.13131100  |
| C | 0.33090500  | -2.32922800 | 2.00894500  |
| H | 0.34771900  | -1.24776500 | 2.10283500  |
| C | -0.58047000 | -3.06583800 | 2.76596000  |
| H | -1.24361400 | -2.55272200 | 3.45825800  |
| C | -0.64127200 | -4.45612800 | 2.63641100  |
| H | -1.34887500 | -5.03205900 | 3.22762500  |
| C | 0.21467300  | -5.09825100 | 1.74196600  |
| H | 0.16789900  | -6.17711800 | 1.61982300  |
| C | 1.14338400  | -4.36240100 | 1.00107400  |
| H | 1.80446700  | -4.88083700 | 0.31649600  |
| P | 2.36766700  | 1.89951300  | -0.11520600 |
| C | 4.21205100  | 2.05167200  | 0.16789400  |
| C | 5.11257400  | 1.65095100  | -0.83460300 |
| H | 4.75204600  | 1.20521900  | -1.75209200 |
| C | 6.48790000  | 1.83951700  | -0.68343500 |
| H | 7.15886100  | 1.52731500  | -1.47939200 |
| C | 6.99575000  | 2.42664700  | 0.47701700  |
| H | 8.06608900  | 2.57530200  | 0.59429500  |
| C | 6.11381400  | 2.82700800  | 1.48051600  |
| H | 6.49234200  | 3.28801400  | 2.38923300  |
| C | 4.73753000  | 2.64684900  | 1.32587200  |
| H | 4.07777600  | 2.97743300  | 2.11880600  |
| C | 2.07184400  | 3.45574200  | -1.10528200 |
| C | 3.12158000  | 4.16100500  | -1.71419800 |
| H | 4.14511800  | 3.82346000  | -1.61024000 |
| C | 2.87200600  | 5.31550500  | -2.46066000 |
| H | 3.70362500  | 5.83850500  | -2.92571100 |
| C | 1.57179400  | 5.79703900  | -2.60151600 |
| H | 1.37933100  | 6.69725100  | -3.17941000 |
| C | 0.51889200  | 5.10814800  | -1.99734800 |
| H | -0.50311100 | 5.46182400  | -2.10214400 |
| C | 0.76327800  | 3.94473300  | -1.26864200 |
| H | -0.07280100 | 3.41699000  | -0.82904800 |
| C | 1.75260400  | 2.37203800  | 1.57830600  |
| C | 1.35034600  | 3.67034500  | 1.92619800  |
| H | 1.31608700  | 4.44814800  | 1.17210900  |
| C | 1.00218600  | 3.97966100  | 3.24496500  |
| H | 0.69678900  | 4.99312600  | 3.49341800  |
| C | 1.06460600  | 3.00341600  | 4.24069700  |
| H | 0.80559900  | 3.25011400  | 5.26708100  |
| C | 1.47555500  | 1.71074900  | 3.90791400  |
| H | 1.54497500  | 0.94254400  | 4.67367800  |
| C | 1.80780400  | 1.39886500  | 2.58874200  |
| H | 2.14729200  | 0.39777700  | 2.35071700  |

**2. Tables of the DFT B3LYP/6-31G\*/LANL2DZ optimized geometries found for the PH<sub>3</sub>-ligated models in the relaxed potential energy scan (PES) upon the rotation of the {M(X)(PH<sub>3</sub>)<sub>2</sub>} ligand sphere (Cartesian coordinates, in Angstroms). Energies (in Hartrees) in parentheses.**

**2.1 [6,6,6-H(PH<sub>3</sub>)<sub>2</sub>-*nido*-6-RhB<sub>9</sub>H<sub>13</sub>] model**

**Table S14 Low-energy asymmetric conformer**

|    | <b>x</b>    | <b>y</b>    | <b>z</b>    |
|----|-------------|-------------|-------------|
| B  | 2.30143200  | 1.35694300  | 0.28031000  |
| B  | 2.47664600  | 0.37245000  | -1.22369000 |
| B  | 0.78721600  | 1.10780100  | 1.06717300  |
| B  | 3.50735300  | 0.02464700  | 0.19925300  |
| B  | 2.50428500  | 0.27029800  | 1.64628500  |
| B  | 2.74740600  | -1.28579300 | -0.74189600 |
| B  | 2.90181000  | -1.35618000 | 1.03677300  |
| H  | 2.74420700  | 2.45366200  | 0.42067200  |
| H  | 3.05447700  | 0.71744700  | -2.20633300 |
| H  | 0.40516300  | 2.04916800  | 1.69872200  |
| H  | 4.66684100  | 0.28125100  | 0.15200100  |
| H  | 2.88293200  | 0.57039000  | 2.73231800  |
| H  | 3.31455000  | -2.11246500 | -1.37958800 |
| H  | 3.46259500  | -2.20923200 | 1.64282000  |
| B  | 0.91319800  | 1.14243800  | -0.83131800 |
| H  | 0.62008000  | 2.11254700  | -1.46079600 |
| Rh | -0.80775300 | -0.10487600 | -0.21560800 |
| P  | -2.11365100 | 1.75878700  | 0.14055600  |
| P  | -2.43940600 | -1.73356300 | 0.39408900  |
| B  | 1.05008700  | -0.54192800 | -1.54215500 |
| H  | 0.86974600  | -0.90201500 | -2.66095100 |
| H  | 2.05358200  | -1.93487100 | 0.17237900  |
| H  | 1.90598700  | -0.90240400 | 1.79023700  |
| H  | 0.10741500  | 0.07677300  | 1.40518700  |
| H  | 0.29074400  | -1.33059700 | -0.76018400 |
| H  | -1.47311300 | -0.19575400 | -1.63861300 |
| H  | -2.55338000 | -2.19705300 | 1.72703400  |
| H  | -3.81771300 | -1.50512600 | 0.16734300  |
| H  | -2.36320000 | -2.99665400 | -0.23337100 |
| H  | -2.29809200 | 2.26036200  | 1.44656800  |
| H  | -1.71148500 | 2.93947500  | -0.51239400 |
| H  | -3.46378300 | 1.71278400  | -0.27403900 |

**Table S15 High-energy asymmetric conformer**

|   | <b>x</b>   | <b>y</b>    | <b>z</b>    |
|---|------------|-------------|-------------|
| B | 2.13603300 | 0.60545400  | 1.36545900  |
| B | 2.41634400 | 1.23308300  | -0.32092900 |
| B | 0.67968200 | -0.27185900 | 1.52131900  |
| B | 3.50321900 | -0.01129600 | 0.44072100  |
| B | 2.43572600 | -1.12911300 | 1.31272900  |
| B | 3.01133900 | -0.07158700 | -1.28940100 |

|    |             |             |             |
|----|-------------|-------------|-------------|
| B  | 3.14201000  | -1.52325200 | -0.32116800 |
| H  | 2.42619900  | 1.20351600  | 2.35313100  |
| H  | 2.90501900  | 2.29168900  | -0.56447200 |
| H  | 0.18469800  | -0.25233400 | 2.60862100  |
| H  | 4.60544100  | 0.29385200  | 0.76340700  |
| H  | 2.78101300  | -1.82458300 | 2.21303600  |
| H  | 3.69545600  | 0.05564900  | -2.25178600 |
| H  | 3.82363100  | -2.47171300 | -0.53221700 |
| B  | 0.78723300  | 1.21939400  | 0.37115300  |
| H  | 0.43012200  | 2.31565500  | 0.68921700  |
| Rh | -0.80433600 | -0.10997000 | -0.42752600 |
| P  | -1.97840200 | 1.66133800  | 0.41242100  |
| P  | -2.61498800 | -1.55051900 | 0.14973500  |
| B  | 1.11700200  | 0.74168500  | -1.39606300 |
| H  | 0.97893600  | 1.43450800  | -2.35334200 |
| H  | 2.44300000  | -1.25826200 | -1.41106900 |
| H  | 2.04144100  | -1.93419200 | 0.34301300  |
| H  | 0.10156400  | -1.14430300 | 0.80749800  |
| H  | 0.56135900  | -0.43370600 | -1.60789500 |
| H  | -1.55675700 | 0.26988400  | -1.76387500 |
| H  | -2.61331200 | -1.90107500 | 1.51799700  |
| H  | -3.92732300 | -1.02768300 | 0.08353300  |
| H  | -2.91245700 | -2.83393700 | -0.37206900 |
| H  | -1.85535000 | 2.04160100  | 1.76298700  |
| H  | -1.76782000 | 2.89760400  | -0.22075300 |
| H  | -3.39183600 | 1.60165700  | 0.32229700  |

**Table S16** Intermediate-energy symmetric conformer

|    | <b>x</b>    | <b>y</b>    | <b>z</b>    |
|----|-------------|-------------|-------------|
| B  | 2.24376800  | -0.83689400 | 1.21680200  |
| B  | 2.24716400  | 0.94057800  | 1.13149300  |
| B  | 0.81893700  | -1.45197000 | 0.41705900  |
| B  | 3.48879800  | 0.00601200  | 0.24191700  |
| B  | 2.65666300  | -1.45512700 | -0.37886100 |
| B  | 2.65445000  | 1.39415100  | -0.52480700 |
| B  | 3.11970600  | -0.08279900 | -1.43249300 |
| H  | 2.63329300  | -1.51590700 | 2.11494400  |
| H  | 2.64297800  | 1.69973900  | 1.95986800  |
| H  | 0.43583900  | -2.53969500 | 0.73528400  |
| H  | 4.61722300  | 0.02450400  | 0.61600800  |
| H  | 3.15308800  | -2.51570100 | -0.58218000 |
| H  | 3.15401100  | 2.42458200  | -0.84288400 |
| H  | 3.84850800  | -0.12671100 | -2.36870200 |
| B  | 0.72761100  | 0.06550000  | 1.40725500  |
| H  | 0.26296600  | 0.12088000  | 2.50574000  |
| Rh | -0.79461800 | -0.00508100 | -0.33928900 |
| P  | -2.23017100 | 1.73345700  | 0.14241200  |
| P  | -2.24285900 | -1.73789600 | 0.12379900  |
| B  | 0.82966400  | 1.49572700  | 0.28255600  |
| H  | 0.46003600  | 2.60793400  | 0.52374500  |
| H  | 2.21422600  | 0.85807000  | -1.65835100 |
| H  | 2.22221900  | -1.04729300 | -1.56586500 |
| H  | 0.37406400  | -1.22337300 | -0.82846200 |

|   |             |             |             |
|---|-------------|-------------|-------------|
| H | 0.36307700  | 1.18576300  | -0.92818500 |
| H | -1.55742400 | -0.01534800 | -1.77080900 |
| H | -2.33183700 | -2.22504100 | 1.44490200  |
| H | -3.61891700 | -1.56362700 | -0.14480700 |
| H | -2.02347700 | -2.94799900 | -0.56056000 |
| H | -2.25976200 | 2.24686200  | 1.45565700  |
| H | -2.05446300 | 2.92928400  | -0.57862700 |
| H | -3.61618200 | 1.54241600  | -0.05647100 |

## 2.2 [6,6,6-H(PMe<sub>3</sub>)<sub>2</sub>-nido-6-IrB<sub>9</sub>H<sub>13</sub>]

**Table S17 Low-energy asymmetric conformer**

|    | <b>x</b>    | <b>y</b>    | <b>z</b>    |
|----|-------------|-------------|-------------|
| B  | -3.06283400 | -1.37032000 | 0.37007900  |
| B  | -3.29797000 | -0.39259100 | -1.11424700 |
| B  | -1.45793700 | -1.16021900 | 1.00309000  |
| B  | -4.22176800 | 0.00709300  | 0.36751200  |
| B  | -3.11813200 | -0.27974900 | 1.73824400  |
| B  | -3.47086600 | 1.28000300  | -0.62786000 |
| B  | -3.51905200 | 1.35728600  | 1.16311500  |
| H  | -3.53109100 | -2.44732800 | 0.57692100  |
| H  | -3.94841400 | -0.70420500 | -2.06339700 |
| H  | -1.07735300 | -2.08969000 | 1.65312800  |
| H  | -5.39185300 | -0.20270300 | 0.40871500  |
| H  | -3.42412700 | -0.57246800 | 2.84999100  |
| H  | -4.05023900 | 2.12471400  | -1.23229700 |
| H  | -4.01498800 | 2.22592500  | 1.80479500  |
| B  | -1.74925500 | -1.22494600 | -0.82820200 |
| H  | -1.57251800 | -2.20351200 | -1.48675200 |
| Ir | 0.07615300  | 0.01532900  | -0.29211700 |
| P  | 1.54854800  | -1.72765500 | 0.12609300  |
| P  | 1.55715000  | 1.79154900  | 0.15154200  |
| B  | -1.84990200 | 0.46176400  | -1.51781800 |
| H  | -1.71235300 | 0.81570000  | -2.64595600 |
| H  | -2.71434200 | 1.91545900  | 0.24900300  |
| H  | -2.48309500 | 0.87945800  | 1.84231000  |
| H  | -0.72111700 | -0.11550600 | 1.36083500  |
| H  | -1.05759400 | 1.26913200  | -0.77275900 |
| H  | 0.69384900  | 0.09022000  | -1.77506100 |
| C  | 1.98634000  | -2.08349100 | 1.88271100  |
| H  | 1.06793100  | -2.26371800 | 2.44659200  |
| H  | 2.63375400  | -2.96458400 | 1.95295100  |
| H  | 2.50096400  | -1.22520500 | 2.32340300  |
| C  | 0.97750300  | -3.36024600 | -0.50142500 |
| H  | 1.74171200  | -4.12588500 | -0.32674100 |
| H  | 0.04851300  | -3.63937800 | 0.00044600  |
| H  | 0.76929600  | -3.27992500 | -1.57139000 |
| C  | 3.19920100  | -1.56719900 | -0.68632800 |
| H  | 3.72965000  | -0.68899200 | -0.30719900 |
| H  | 3.81259200  | -2.45586400 | -0.50152700 |
| H  | 3.05666100  | -1.44640300 | -1.76403500 |
| C  | 2.71245000  | 1.70917200  | 1.59755700  |
| H  | 3.45113500  | 0.91515100  | 1.45158100  |



|   |             |            |             |
|---|-------------|------------|-------------|
| H | 3.24305100  | 2.65815700 | 1.73518900  |
| H | 2.14040600  | 1.48420600 | 2.50292100  |
| C | 2.67653000  | 2.32878900 | -1.21660500 |
| H | 3.24568800  | 3.22359900 | -0.94068900 |
| H | 3.37351000  | 1.52465700 | -1.47032900 |
| H | 2.07147400  | 2.54154700 | -2.10272400 |
| C | 0.63194500  | 3.34781200 | 0.52057600  |
| H | 1.31863800  | 4.17654100 | 0.72688600  |
| H | 0.00075200  | 3.60720700 | -0.33443600 |
| H | -0.01496000 | 3.19433200 | 1.38965600  |

**Table S18 High-energy asymmetric conformer**

|    | <b>x</b>    | <b>y</b>    | <b>z</b>    |
|----|-------------|-------------|-------------|
| B  | -2.84487700 | -0.64317800 | 1.43107000  |
| B  | -3.20614700 | -1.20557800 | -0.23841200 |
| B  | -1.33793500 | 0.15241000  | 1.55576000  |
| B  | -4.21034800 | 0.08060800  | 0.59406200  |
| B  | -3.03040200 | 1.11793900  | 1.41398400  |
| B  | -3.79999800 | 0.11985900  | -1.15985500 |
| B  | -3.81872500 | 1.56589700  | -0.19259200 |
| H  | -3.13096200 | -1.23510200 | 2.42519000  |
| H  | -3.74875600 | -2.23179700 | -0.51434100 |
| H  | -0.81870600 | 0.10265400  | 2.63195500  |
| H  | -5.31416600 | -0.16870000 | 0.95974100  |
| H  | -3.30775300 | 1.82624100  | 2.32957500  |
| H  | -4.51821200 | 0.01517000  | -2.10049000 |
| H  | -4.46059100 | 2.55285800  | -0.35167600 |
| B  | -1.55082300 | -1.28821200 | 0.38948300  |
| H  | -1.23584800 | -2.40080200 | 0.68120500  |
| Ir | 0.07306900  | 0.03215000  | -0.45745100 |
| P  | 1.46281000  | -1.69640500 | 0.20001500  |
| P  | 1.65679500  | 1.70528800  | 0.07009200  |
| B  | -1.87455100 | -0.72833000 | -1.32078500 |
| H  | -1.82191600 | -1.29915700 | -2.36418400 |
| H  | -3.19216400 | 1.28950300  | -1.31475700 |
| H  | -2.66333700 | 1.91317100  | 0.42160500  |
| H  | -0.75605300 | 1.04593100  | 0.85307300  |
| H  | -1.31127600 | 0.53322200  | -1.49701100 |
| H  | 0.75804300  | -0.25083200 | -1.88688900 |
| C  | 1.46168600  | -2.23787700 | 1.96312400  |
| H  | 0.44421100  | -2.49957900 | 2.25920100  |
| H  | 2.11773000  | -3.10552200 | 2.09688900  |
| H  | 1.80589600  | -1.42239600 | 2.60508700  |
| C  | 1.09139000  | -3.23763600 | -0.74263200 |
| H  | 1.74014900  | -4.05552600 | -0.40865700 |
| H  | 0.04580000  | -3.51418300 | -0.60381600 |
| H  | 1.26253600  | -3.04531000 | -1.80552800 |
| C  | 3.27290700  | -1.54524400 | -0.15646400 |
| H  | 3.74577700  | -0.77706400 | 0.46061100  |
| H  | 3.76933400  | -2.50076500 | 0.04505300  |
| H  | 3.41345900  | -1.28960700 | -1.21052000 |
| C  | 2.29767300  | 1.61313500  | 1.80133100  |
| H  | 2.93132200  | 0.73276400  | 1.93737800  |

|   |            |            |             |
|---|------------|------------|-------------|
| H | 2.88043500 | 2.50729000 | 2.04919000  |
| H | 1.44818300 | 1.53036600 | 2.48583200  |
| C | 3.17897500 | 1.99943500 | -0.93914000 |
| H | 3.75889100 | 2.83767700 | -0.53637000 |
| H | 3.81131800 | 1.10947600 | -0.96572100 |
| H | 2.87663900 | 2.23193600 | -1.96471600 |
| C | 0.89970000 | 3.39343600 | 0.06128500  |
| H | 1.62400600 | 4.15960800 | 0.36127500  |
| H | 0.53114600 | 3.61688600 | -0.94418000 |
| H | 0.04955000 | 3.41419300 | 0.74953200  |

**Table S19 Intermediate-energy symmetric conformer**

|    | <b>x</b>    | <b>x</b>    | <b>z</b>    |
|----|-------------|-------------|-------------|
| B  | -2.98010700 | 0.87632400  | 1.22403800  |
| B  | -2.98685900 | -0.89920000 | 1.19898100  |
| B  | -1.55634100 | 1.45733300  | 0.40956300  |
| B  | -4.23631100 | 0.00641600  | 0.28534400  |
| B  | -3.40098000 | 1.43665400  | -0.38665500 |
| B  | -3.40875900 | -1.41032700 | -0.42860800 |
| B  | -3.86818400 | 0.02897700  | -1.38772100 |
| H  | -3.36348400 | 1.59141000  | 2.09804700  |
| H  | -3.37575100 | -1.63603200 | 2.05216300  |
| H  | -1.21708600 | 2.55981000  | 0.71325100  |
| H  | -5.36379400 | 0.00442900  | 0.66488500  |
| H  | -3.89899700 | 2.48898700  | -0.63111700 |
| H  | -3.91619300 | -2.45039400 | -0.70427700 |
| H  | -4.59124300 | 0.04463000  | -2.33006800 |
| B  | -1.46413000 | -0.02172800 | 1.45313300  |
| H  | -1.03568500 | -0.04133400 | 2.56799800  |
| Ir | 0.09439300  | 0.00207300  | -0.31688000 |
| P  | 1.52146800  | -1.80793300 | 0.06769000  |
| P  | 1.53114100  | 1.80369600  | 0.06869400  |
| B  | -1.57087000 | -1.46930400 | 0.36494400  |
| H  | -1.23916800 | -2.58166000 | 0.63959200  |
| H  | -2.95914800 | -0.92205300 | -1.57521500 |
| H  | -2.95452200 | 0.98050200  | -1.54826000 |
| H  | -1.07689800 | 1.22264000  | -0.84032600 |
| H  | -1.08012300 | -1.20493000 | -0.87062300 |
| H  | 0.80760000  | 0.00488000  | -1.78965500 |
| C  | 1.54333200  | -2.43939100 | 1.80027000  |
| H  | 0.52889100  | -2.70879400 | 2.10017100  |
| H  | 2.20239300  | -3.31022500 | 1.89181300  |
| H  | 1.89489500  | -1.64695700 | 2.46781600  |
| C  | 1.09939700  | -3.28384200 | -0.95589600 |
| H  | 1.73680300  | -4.13255200 | -0.68465500 |
| H  | 0.05279000  | -3.55575200 | -0.81172800 |
| H  | 1.25604800  | -3.03701300 | -2.01034100 |
| C  | 3.33053000  | -1.67967200 | -0.29459100 |
| H  | 3.83601800  | -1.05628400 | 0.44578500  |
| H  | 3.77428500  | -2.68033200 | -0.25667100 |
| H  | 3.49184100  | -1.25619700 | -1.28887000 |
| C  | 1.60332700  | 2.39858700  | 1.81289700  |
| H  | 1.96750600  | 1.59039100  | 2.45429900  |

|   |            |            |             |
|---|------------|------------|-------------|
| H | 2.26917700 | 3.26408500 | 1.90586300  |
| H | 0.59836100 | 2.66713600 | 2.14475600  |
| C | 3.32664400 | 1.68315700 | -0.35799600 |
| H | 3.77294000 | 2.68234200 | -0.31195800 |
| H | 3.85902700 | 1.04044100 | 0.34537400  |
| H | 3.44934200 | 1.28469500 | -1.36830500 |
| C | 1.08092600 | 3.30133100 | -0.91061200 |
| H | 1.72830400 | 4.14279000 | -0.64044200 |
| H | 1.20650000 | 3.07623300 | -1.97405200 |
| H | 0.03972200 | 3.57232900 | -0.73078300 |

### 2.3 [6,6,6-(CO)(PH<sub>3</sub>)<sub>2</sub>-*nido*-6-RuB<sub>9</sub>H<sub>13</sub>] model

**Table S20 Low-energy asymmetric conformer**

|    | <b>x</b>    | <b>y</b>    | <b>z</b>    |
|----|-------------|-------------|-------------|
| B  | 2.52714700  | -1.34157800 | 0.33793800  |
| B  | 1.02978100  | -0.83831000 | 1.17263500  |
| B  | 2.52987100  | 0.10840100  | 1.39684500  |
| B  | 3.69054800  | 0.00005600  | 0.04191300  |
| B  | 1.05330800  | -1.41582300 | -0.57146200 |
| B  | 1.06231100  | 0.99806100  | 1.23407200  |
| B  | 2.79805000  | 1.50627300  | 0.36580600  |
| B  | 3.15215900  | 0.93733500  | -1.29841800 |
| C  | -1.73145900 | 0.58387100  | 1.48976100  |
| O  | -2.34340100 | 0.86116200  | 2.42645500  |
| Ru | -0.69252700 | 0.06085600  | -0.01471000 |
| H  | 2.99629000  | -2.40301400 | 0.60664700  |
| H  | 0.71148100  | -1.53240500 | 2.08954900  |
| H  | 3.01084900  | 0.18153700  | 2.48388100  |
| H  | 4.84600900  | -0.15670500 | 0.27223900  |
| H  | 0.74077300  | -2.50590800 | -0.95201100 |
| H  | 0.76113000  | 1.69385600  | 2.15287800  |
| H  | 3.27231600  | 2.54207600  | 0.70422900  |
| H  | 3.75905700  | 1.54740300  | -2.11654600 |
| H  | 0.43054800  | -0.52857500 | -1.31688100 |
| H  | 0.39033400  | 1.44599500  | 0.17004800  |
| H  | 2.20602800  | 1.73954800  | -0.79208700 |
| H  | 2.25079700  | 0.18800500  | -1.93062200 |
| P  | -1.92572300 | -1.91549600 | -0.29879100 |
| H  | -1.65751100 | -2.98134100 | 0.58414700  |
| H  | -3.33584700 | -1.88557300 | -0.17375600 |
| H  | -1.83599100 | -2.60943100 | -1.52337200 |
| P  | -1.98614500 | 1.41099200  | -1.49413200 |
| H  | -3.32611400 | 1.13642800  | -1.86885700 |
| H  | -2.18432100 | 2.76482700  | -1.13861600 |
| H  | -1.48445400 | 1.63482400  | -2.79711200 |
| B  | 2.83847800  | -0.81322200 | -1.30077900 |
| H  | 3.32553000  | -1.48014300 | -2.15565600 |

**Table S21 High-energy asymmetric conformer**

|    | <b>x</b>    | <b>y</b>    | <b>z</b>    |
|----|-------------|-------------|-------------|
| B  | 2.43878200  | -0.88632400 | 1.09943600  |
| B  | 0.98462100  | 0.13272200  | 1.29999600  |
| B  | 2.54853300  | 0.90712700  | 0.99300400  |
| B  | 3.71448000  | -0.17248100 | 0.11697400  |
| B  | 0.99577900  | -1.49281900 | 0.39296600  |
| B  | 1.12941200  | 1.53221600  | 0.14050500  |
| B  | 3.04143000  | 1.33649500  | -0.60805000 |
| B  | 3.30725700  | -0.11175200 | -1.56135900 |
| C  | -1.78466500 | 1.65991600  | -0.47200800 |
| O  | -2.39467300 | 2.63038600  | -0.61106900 |
| Ru | -0.69798300 | 0.11762500  | -0.20980000 |
| H  | 2.81124400  | -1.53975200 | 2.02252100  |
| H  | 0.65254700  | 0.24594500  | 2.44464600  |
| H  | 2.99092000  | 1.61748500  | 1.84047100  |
| H  | 4.84225400  | -0.24610100 | 0.48465000  |
| H  | 0.60084900  | -2.53172400 | 0.83421900  |
| H  | 0.87214500  | 2.67720500  | 0.34341300  |
| H  | 3.61336300  | 2.34014500  | -0.88358000 |
| H  | 3.99161800  | -0.23753800 | -2.52312900 |
| H  | 0.43096200  | -1.25559600 | -0.72086400 |
| H  | 0.63190200  | 1.15795300  | -1.02396900 |
| H  | 2.51391000  | 0.91998900  | -1.75085100 |
| H  | 2.28645900  | -0.97725300 | -1.66041800 |
| P  | -1.73208400 | -0.38841400 | 1.79550200  |
| H  | -1.73176500 | 0.62732400  | 2.76839400  |
| H  | -3.12207000 | -0.68205700 | 1.79952900  |
| H  | -1.27822900 | -1.47676500 | 2.56360400  |
| P  | -2.21530000 | -1.42140700 | -1.20894900 |
| H  | -3.56889800 | -1.42565800 | -0.79399600 |
| H  | -2.45822900 | -1.59193500 | -2.59473100 |
| H  | -1.90767000 | -2.76512700 | -0.90200000 |
| B  | 2.73224000  | -1.50640400 | -0.52962500 |
| H  | 3.15342400  | -2.58123100 | -0.81363100 |

**Table S22 Intermediate-energy asymmetric conformer**

|    | <b>x</b>    | <b>y</b>    | <b>z</b>    |
|----|-------------|-------------|-------------|
| B  | 2.49831800  | -0.91283400 | 1.06393200  |
| B  | 0.99241100  | -0.02418200 | 1.41190300  |
| B  | 2.49836700  | 0.87591300  | 1.09522000  |
| B  | 3.67806900  | -0.00192900 | 0.07174400  |
| B  | 1.03011100  | -1.49854700 | 0.34371100  |
| B  | 1.02950500  | 1.48209400  | 0.39176800  |
| B  | 2.81299100  | 1.43774800  | -0.53650600 |
| B  | 3.17570900  | 0.03099000  | -1.57530200 |
| C  | -1.74552100 | 0.00975800  | -1.77125200 |
| O  | -2.25619800 | 0.01413000  | -2.80702300 |
| Ru | -0.69510200 | 0.00073400  | -0.14701100 |
| H  | 2.94940200  | -1.63437300 | 1.89757100  |
| H  | 0.62147000  | -0.04268800 | 2.54902700  |
| H  | 2.94788200  | 1.56856300  | 1.95386600  |

|   |             |             |             |
|---|-------------|-------------|-------------|
| H | 4.82918100  | -0.00786800 | 0.36831500  |
| H | 0.71398300  | -2.60953500 | 0.65620200  |
| H | 0.71111000  | 2.58299600  | 0.73615300  |
| H | 3.29569400  | 2.48614800  | -0.81951100 |
| H | 3.81094500  | 0.04772600  | -2.57786300 |
| H | 0.42127500  | -1.22656900 | -0.80466400 |
| H | 0.42681700  | 1.24316900  | -0.76788900 |
| H | 2.25687300  | 0.99144100  | -1.64987400 |
| H | 2.25399900  | -0.92613200 | -1.68366400 |
| P | -1.94380000 | 1.71237600  | 0.85000300  |
| H | -1.86406200 | 3.01066600  | 0.30666800  |
| H | -3.35323800 | 1.59852300  | 0.92629700  |
| H | -1.68117100 | 2.01416300  | 2.20205800  |
| P | -1.94045700 | -1.71739400 | 0.84162900  |
| H | -3.34789200 | -1.59574300 | 0.93982900  |
| H | -1.87761000 | -3.01010300 | 0.28261500  |
| H | -1.65949500 | -2.03578900 | 2.18609700  |
| B | 2.80930800  | -1.41544100 | -0.58881500 |
| H | 3.29194900  | -2.45228800 | -0.91180300 |

---

<sup>i</sup> Sheldrick, G. M., 2008, CELL\_NOW, University of Göttingen

<sup>ii</sup> Sheldrick, G. M., 2008, TWINABS, University of Göttingen
